# Supplementary material for: An unusual four-step cascade reaction for accessing furo[3,4-c]pyridine-1,4-dionesviarhodium catalysis
Source: Royal Society of Chemistry journal article supplement (doi:10.1039/d3qo00909b), 2023-01-01

## Supporting Information

### An Unusual Four-Step Cascade Reaction for Accessing to Furo[3,4-c]pyridine-1,4-diones via Rhodium Catalysis

Yidi Li,<sup>a,e,#</sup> Huiying Xu,<sup>c,#</sup> Zhi Zhou,<sup>\*,c</sup> Lin Huang,<sup>d,b</sup> Zhenhao Tang,<sup>b</sup> Wei Yi<sup>\*,c</sup> and Xiaowei Wu<sup>\*,a,b,d,e</sup>

<sup>a</sup>Drug Discovery and Development Center, Shanghai Institute of Materia Medica, Chinese Academy of Sciences, Shanghai 201203, China

<sup>b</sup>School of Pharmaceutical Sciences, Southern Medical University, Guangzhou 510515, China

<sup>c</sup>Guangzhou Municipal and Guangdong Provincial Key Laboratory of Protein Modification and Degradation & Molecular Target and Clinical Pharmacology, State Key Laboratory of Respiratory Disease, School of Pharmaceutical Sciences & the Fifth Affiliated Hospital, Guangzhou Medical University, Guangzhou, Guangdong 511436, China

<sup>d</sup>Zhongshan Institute for Drug Discovery, Shanghai Institute of Materia Medica, Chinese Academy of Sciences, Zhongshan 528400, China

<sup>e</sup>University of Chinese Academy of Sciences, No.19A Yuquan Road, Beijing 100049, China

|                                                                                                                      |    |
|----------------------------------------------------------------------------------------------------------------------|----|
| General Information.....                                                                                             | 2  |
| Preparation of Starting Materials .....                                                                              | 2  |
| General Procedure for the Synthesis of Furo[3,4-c]pyridine-1,4-diones <b>3</b> .....                                 | 5  |
| Characterization Data of Products <b>3</b> .....                                                                     | 5  |
| NOESY Experiments for Product <b>3a</b> , <b>3h</b> , <b>3n</b> , <b>3p</b> , <b>3q</b> .....                        | 12 |
| Mechanistic Experiments.....                                                                                         | 16 |
| X-ray data of compound <b>3o-1</b> ( <b>3o-1</b> is a lactone ring-opening structure of <b>3o</b> , CCDC 2281784) .. | 18 |
| Computational Mechanistic Studies.....                                                                               | 19 |
| References.....                                                                                                      | 79 |
| Copies of <sup>1</sup> H, <sup>13</sup> C NMR and <sup>19</sup> F NMR spectra .....                                  | 80 |

## General Information

The chemical reagents were purchased from commercial sources and used directly without purification. Analytical thin-layer chromatography (TLC): HSGF 254 (0.15-0.2 mm thickness). Detection was conducted under UV light at 254 nm. Preparative thin layer chromatography was HSGF 254 (0.4-0.5 mm thickness). Yields refer to isolated compounds.  $^1\text{H}$ ,  $^{13}\text{C}$ , and  $^{19}\text{F}$  NMR spectra were collected on a Bruker 500 MHz instrument in chloroform-*d* or DMSO-*d*<sub>6</sub>. Chemical shifts ( $\delta$ ) are expressed as parts per million (ppm). Proton coupling patterns were recorded as singlet (s), broad (br), doublet (d), triplet (t), quartet (q), and multiplet (m). HRMS (high-resolution mass) were measured on a spectrometer with an electrospray ionization (ESI) source.

## Preparation of Starting Materials

General procedure A for the preparation of **1a**, **1o**, **1p**, **1q**, **1r**, **1s**, **1t**, **1u**.<sup>1</sup>

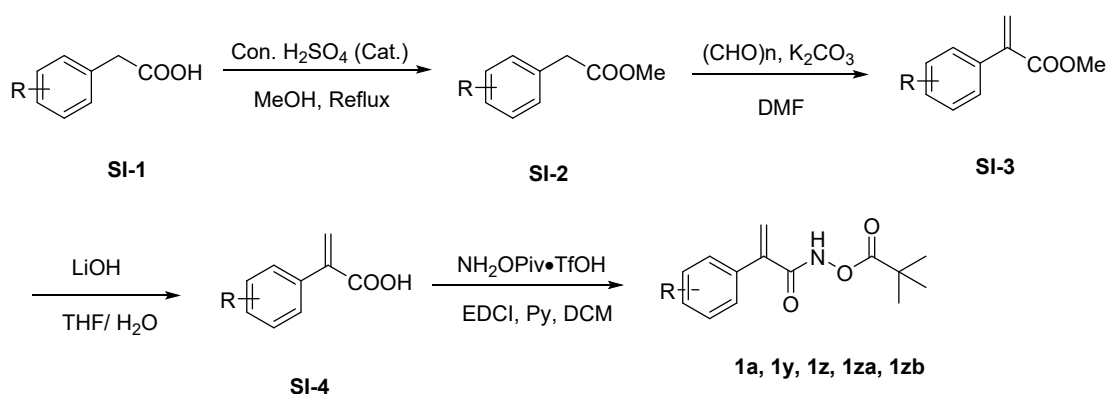

**Step 1:** To a solution of aryl acetic acids **SI-1** (7.3 mmol) in MeOH (20 mL), some drops of concentrated sulfuric acid were added. The reaction was refluxed for 8 hours, then it was cooled to room temperature. The solvent was concentrated under reduced pressure, and the residue was dissolved in EtOAc (30 mL), washed with H<sub>2</sub>O (30 mL) and brine (30 mL), dried with Na<sub>2</sub>SO<sub>4</sub>, filtered, and concentrated under reduced pressure. The crude product was used for the next step without further purification.

**Step 2:** A mixture of ester **SI-2** (7.0 mmol), paraformaldehyde (1.5 eq) and K<sub>2</sub>CO<sub>3</sub> (1 eq) in DMF (10 mL) was heated at 80°C for 1-3 h. The mixture was cooled to room temperature, water (30 mL) and Et<sub>2</sub>O (30 mL) were added, and the organic layer was separated. The collected organic layers were washed with brine (10 mL), dried with Na<sub>2</sub>SO<sub>4</sub> and concentrated under reduced pressure. The

resulting crude product was purified by column chromatography eluting with PE/EtOAc from 50:1 to 20:1.

**Step 3:** A 50 mL RBF was charged with methyl acrylate **SI-3** (7.0 mmol), LiOH (5 eq) and THF/H<sub>2</sub>O (1:1, 0.25 M) sequentially. The reaction flask was subjected to an 80°C preheated oil bath and stirred overnight, at which time the resulting mixture was cooled to room temperature and extracted with Et<sub>2</sub>O. The aqueous phase was acidified with 2N HCl and extracted with EtOAc (30 mL x 2). The combined organic layers were concentrated under vacuum. The crude product was used for the next step without further purification.

**Step 4:** To a solution of acrylic acid **SI-4** (2.0 mmol) in DCM (20 mL) was added pyridine (7.1 eq), EDCI (2eq) and NH<sub>2</sub>OPiv.TfOH (1.2 eq), and stirred at room temperature overnight. The mixture was washed with 2N HCl (20 mL), saturated aq. NaHCO<sub>3</sub> (20 mL) and brine (20 mL), dried over Na<sub>2</sub>SO<sub>4</sub> and concentrated under reduced pressure to give the crude products, which was purified by column chromatography eluting with PE/EtOAc from 20:1 to 5:1.

General procedure B for the preparation of **2a-2n**.<sup>2</sup>

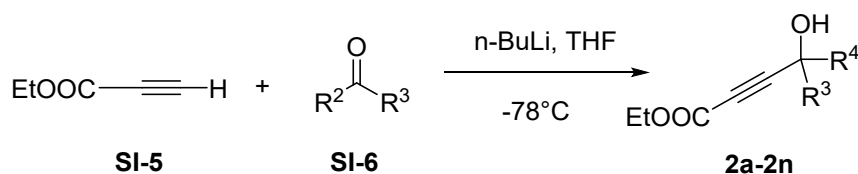

To a solution of ethyl propiolate **SI-5** (0.3 mL, 3 mmol) in THF (15 mL) was added dropwise a solution of n-BuLi (1.6 M in hexane, 2.1 mL, 3.3 mmol) at -78 °C. After stirring for 0.5 h, **SI-6** (3.3 mmol) was added to the solution, and the resulting mixture was stirred at that temperature for additional 3 h. The reaction was then quenched with sat. aq. NH<sub>4</sub>Cl, and the product was extracted with EtOAc. The combined organic layer was washed with brine, dried over Na<sub>2</sub>SO<sub>4</sub> and evaporated. The crude mixture was purified by silica gel column chromatography (hexane/EtOAc = 5:1).

Characterization Data of **2k**

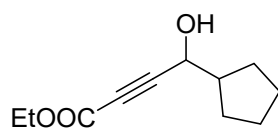

<sup>1</sup>H NMR (500 MHz, Chloroform-*d*) δ 4.33 (d, *J* = 7.2 Hz, 1H), 4.22 (m, 2H), 2.44 – 2.36 (m, 1H), 2.22

(h,  $J = 8.0$  Hz, 1H), 1.80 (m, 2H), 1.69 – 1.51 (m, 4H), 1.48 – 1.38 (m, 2H), 1.29 (t,  $J = 7.2$  Hz, 3H).

#### Preparation of **1a-D**<sup>1</sup>

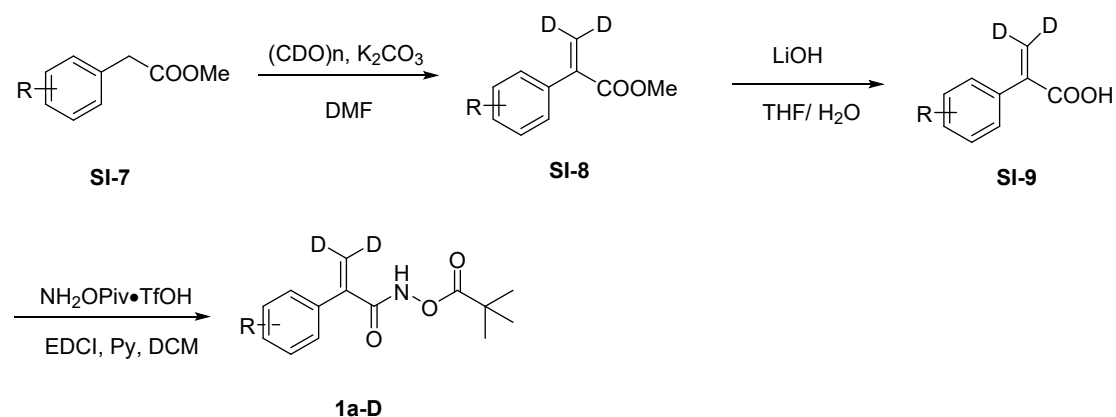

**Step 1:** A mixture of ester **SI-7** (7.0 mmol), D-paraformaldehyde (1.5 eq) and  $\text{K}_2\text{CO}_3$  (1 eq) in DMF (10 mL) was heated at 80°C for 1-3 h. The mixture was cooled at room temperature, water (30 mL) and Et<sub>2</sub>O (30 mL) were added, and the organic layer was separated. The collected organic layers were washed with brine (10 mL), dried with  $\text{Na}_2\text{SO}_4$  and concentrated under reduced pressure. The resulting crude product was purified by column chromatography eluting with PE/EtOAc from 50:1 to 20:1.

**Step 2:** A 50 mL RBF was charged with methyl acrylate **SI-8** (7.0 mmol), LiOH (5 eq) and THF/H<sub>2</sub>O (1:1, 0.25 M) sequentially. The reaction flask was subjected to an 80°C preheated oil bath and stirred overnight, at which time the resulting mixture was cooled to room temperature and extracted with Et<sub>2</sub>O. The aqueous phase was acidified with 2N HCl and extracted with EtOAc (30 mL x 2). The combined organic layers were concentrated under vacuum. The crude product was used for the next step without further purification.

**Step 3:** To a solution of acrylic acid **SI-9** (2.0 mmol) in DCM (20 mL) was added pyridine (7.1 eq), EDCI (2eq) and  $\text{NH}_2\text{OPiv}\cdot\text{TfOH}$  (1.2 eq), and stirred at room temperature overnight. The mixture was washed with 2N HCl (20 mL), saturated aq.  $\text{NaHCO}_3$  (20 mL) and brine (20 mL), dried over  $\text{Na}_2\text{SO}_4$  and concentrated under reduced pressure to give the crude product, which was purified by column chromatography eluting with PE/EtOAc from 20:1 to 5:1.

### General Procedure for the Synthesis of Furo[3,4-c]pyridine-1,4-diones **3**

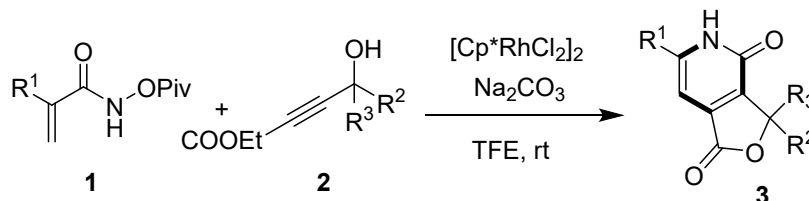

In an 8 mL reaction tube, the mixture of **1** (0.2 mmol), **2** (0.24 mmol), [Cp\*RhCl<sub>2</sub>]<sub>2</sub> (3.0 mol%) and Na<sub>2</sub>CO<sub>3</sub> (1.0 eq.) was added TFE (1.0 mL). Then the resulting mixture was stirred for 6 ~ 12 h. When the reaction was finished, the desired product precipitated out as a solid, and the product was simply collected by filtration. After that, the rest reaction mixture was subjected to flash chromatography on silica gel (dichloromethane/methanol) to provide the desired products **3**.

### Characterization Data of Products **3**

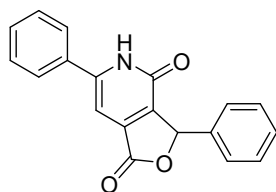

**3,6-diphenyl-3,5-dihydrofuro[3,4-c]pyridine-1,4-dione (3a)**: white solid (47mg, yield 78%), <sup>1</sup>H NMR (500 MHz, DMSO-*d*<sub>6</sub>) δ 12.45 (s, 1H), 7.81 (s, 2H), 7.52 (dd, *J* = 5.1, 2.0 Hz, 3H), 7.43 – 7.40 (m, 3H), 7.38 (dd, *J* = 6.8, 3.0 Hz, 2H), 6.86 (s, 1H), 6.59 (s, 1H). <sup>13</sup>C NMR (126 MHz, DMSO) δ 169.21, 158.50, 134.57, 130.26, 129.14, 128.78, 128.60, 127.50, 127.31, 81.60. HRMS (ESI) *m/z* calculated for C<sub>19</sub>H<sub>14</sub>NO<sub>3</sub><sup>+</sup> [M+H]<sup>+</sup> 304.0968, found: 304.0964.

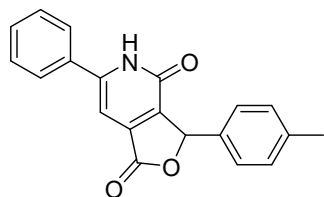

**6-phenyl-3-(p-tolyl)-3,5-dihydrofuro[3,4-c]pyridine-1,4-dione (3b)**: white solid (37mg, yield 58%), <sup>1</sup>H NMR (500 MHz, DMSO-*d*<sub>6</sub>) δ 12.44 (s, 1H), 7.88 – 7.70 (m, 2H), 7.52 (dd, *J* = 5.1, 2.0 Hz, 3H),

7.29 – 7.17 (m, 4H), 6.98 – 6.74 (s, 1H), 6.54 (s, 1H), 2.32 (s, 3H).  $^{13}\text{C}$  NMR (126 MHz, DMSO)  $\delta$  169.82, 159.08, 139.23, 137.16, 132.16, 130.82, 129.72, 129.36, 128.06, 127.87, 82.17, 31.16, 21.28. HRMS (ESI)  $m/z$  calculated for  $\text{C}_{20}\text{H}_{16}\text{NO}_3^+$   $[\text{M}+\text{H}]^+$  318.1125, found: 318.1121.

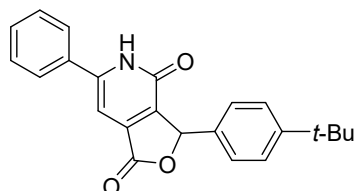

**3-(4-(tert-butyl)phenyl)-6-phenyl-3,5-dihydrofuro[3,4-c]pyridine-1,4-dione (3c):** white solid (43mg, yield 60%),  $^1\text{H}$  NMR (500 MHz,  $\text{DMSO}-d_6$ )  $\delta$  12.42 (s, 1H), 7.80 (dd,  $J = 6.6, 3.0$  Hz, 2H), 7.50 (dd,  $J = 5.0, 1.9$  Hz, 3H), 7.44 – 7.39 (m, 2H), 7.32 – 7.22 (m, 2H), 6.87 (s, 1H), 6.54 (s, 1H), 1.26 (s, 9H).  $^{13}\text{C}$  NMR (126 MHz, DMSO)  $\delta$  169.80, 159.11, 152.25, 137.17, 132.18, 130.83, 129.36, 127.88, 127.83, 126.00, 82.09, 62.43, 34.89, 31.50. HRMS (ESI)  $m/z$  calculated for  $\text{C}_{23}\text{H}_{22}\text{NO}_3^{2+}$   $[\text{M}+\text{H}]^+$  360.1589, found: 360.1591.

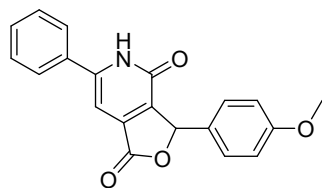

**3-(4-methoxyphenyl)-6-phenyl-3,5-dihydrofuro[3,4-c]pyridine-1,4-dione (3d):** white solid (38mg, yield 57%),  $^1\text{H}$  NMR (500 MHz,  $\text{DMSO}-d_6$ )  $\delta$  7.87 – 7.78 (m, 2H), 7.50 (m, 3H), 7.32 – 7.24 (m, 2H), 6.98 – 6.93 (m, 2H), 6.87 (s, 1H), 6.50 (d,  $J = 3.3$  Hz, 1H), 3.76 (s, 3H).  $^{13}\text{C}$  NMR (126 MHz, DMSO)  $\delta$  169.85, 162.48, 160.41, 159.27, 137.21, 130.76, 129.61, 129.35, 129.29, 127.85, 127.11, 127.02, 114.56, 113.69, 82.12, 55.69. HRMS (ESI)  $m/z$  calculated for  $\text{C}_{20}\text{H}_{16}\text{NO}_4^{2+}$   $[\text{M}+\text{H}]^+$  334.1068, found: 334.1070.

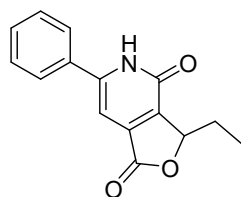

**3-ethyl-6-phenyl-3,5-dihydrofuro[3,4-c]pyridine-1,4-dione (3e):** white solid (26mg, yield 50%),  $^1\text{H}$  NMR (500 MHz,  $\text{DMSO}-d_6$ )  $\delta$  12.42 (s, 1H), 7.78 (dd,  $J = 6.5, 3.0$  Hz, 2H), 7.49 (dd,  $J = 5.0, 1.9$  Hz,

3H), 6.77 (s, 1H), 5.53 (dd,  $J = 7.2, 3.4$  Hz, 1H), 2.22 (m, 1H), 1.77 (m, 1H), 0.88 (t,  $J = 7.4$  Hz, 3H).  $^{13}\text{C}$  NMR (126 MHz, DMSO)  $\delta$  169.75, 159.44, 150.15, 137.32, 133.27, 130.75, 129.35, 127.81, 97.97, 82.27, 24.94, 9.13. HRMS (ESI)  $m/z$  calculated for  $\text{C}_{15}\text{H}_{14}\text{NO}_3^{2+} [\text{M}+\text{H}]^+$  256.0963, found: 256.0989.

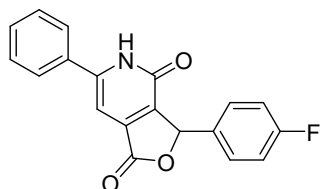

**3-(4-fluorophenyl)-6-phenyl-3,5-dihydrofuro[3,4-c]pyridine-1,4-dione (3f)** : white solid (40mg, yield 62%),  $^1\text{H}$  NMR (500 MHz,  $\text{DMSO}-d_6$ )  $\delta$  7.83 (dd,  $J = 6.6, 2.9$  Hz, 2H), 7.50 (m, 4H), 7.48 – 7.38 (m, 2H), 7.24 (m, 2H), 6.88 (s, 1H), 6.58 (d,  $J = 3.7$  Hz, 1H).  $^{13}\text{C}$  NMR (126 MHz,  $\text{DMSO}-d_6$ )  $\delta$  199.02, 174.52, 168.68, 166.73, 164.14, 155.93, 143.34, 141.89, 138.29, 136.30, 135.52, 135.20, 135.13, 134.09, 132.61, 131.94, 120.89, 120.72, 120.25, 120.07, 102.76, 86.13. HRMS (ESI)  $m/z$  calculated for  $\text{C}_{19}\text{H}_{13}\text{FNO}_3^+ [\text{M}+\text{H}]^+$  322.0874, found: 322.0871.

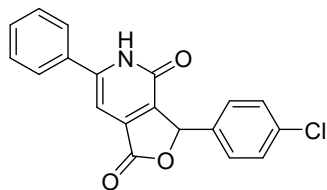

**3-(4-chlorophenyl)-6-phenyl-3,5-dihydrofuro[3,4-c]pyridine-1,4-dione (3g)**: white solid (48mg, yield 71%),  $^1\text{H}$  NMR (500 MHz,  $\text{DMSO}-d_6$ )  $\delta$  12.46 (s, 1H), 7.89 – 7.79 (m, 2H), 7.52 (dd,  $J = 5.2, 1.9$  Hz, 3H), 7.50 – 7.46 (m, 2H), 7.46 – 7.41 (m, 2H), 6.89 (s, 1H), 6.62 (s, 1H).  $^{13}\text{C}$  NMR (126 MHz, DMSO)  $\delta$  168.57, 157.98, 136.10, 133.26, 133.10, 129.80, 128.94, 128.29, 128.13, 126.82, 126.41, 80.12. HRMS (ESI)  $m/z$  calculated for  $\text{C}_{19}\text{H}_{13}\text{ClNO}_3^+ [\text{M}+\text{H}]^+$  338.0578, found: 338.0574.

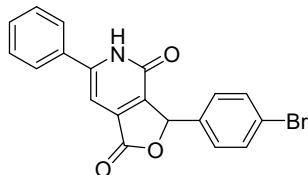

**3-(4-bromophenyl)-6-phenyl-3,5-dihydrofuro[3,4-c]pyridine-1,4-dione (3h)**: white solid (55mg, yield 72%),  $^1\text{H}$  NMR (500 MHz,  $\text{DMSO}-d_6$ )  $\delta$  7.91 – 7.84 (m, 2H), 7.61 – 7.55 (m, 2H), 7.45 (m, 3H), 7.35 (d,  $J = 8.5$  Hz, 2H), 6.85 (s, 1H), 6.47 (d,  $J = 1.9$  Hz, 1H).  $^{13}\text{C}$  NMR (126 MHz, DMSO)  $\delta$  136.91, 134.70, 130.80, 130.50, 129.49, 129.11, 128.66, 128.23, 127.94, 126.43, 126.12, 121.38, 95.27, 80.58.

HRMS (ESI)  $m/z$  calculated for  $C_{19}H_{13}BrNO_3^+ [M+H]^+$  382.0073, found: 382.0080.

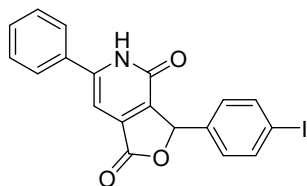

**3-(4-iodophenyl)-6-phenyl-3,5-dihydrofuro[3,4-c]pyridine-1,4-dione (3i):** white solid (65mg, yield 76%),  $^1H$  NMR (500 MHz,  $DMSO-d_6$ )  $\delta$  7.87 – 7.80 (m, 2H), 7.79 – 7.72 (m, 2H), 7.54 – 7.45 (m, 3H), 7.20 (d,  $J = 8.1$  Hz, 2H), 6.87 (s, 1H), 6.69 – 6.34 (m, 1H).  $^{13}C$  NMR (126 MHz,  $DMSO$ )  $\delta$  136.64, 136.39, 135.14, 134.66, 129.35, 129.13, 128.58, 128.23, 127.91, 126.40, 126.12, 94.55, 80.79, 30.09. HRMS (ESI)  $m/z$  calculated for  $C_{19}H_{13}INO_3^+ [M+H]^+$  429.9929, found: 429.9929.

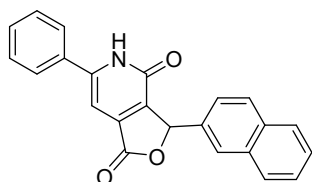

**3-(naphthalen-2-yl)-6-phenyl-3,5-dihydrofuro[3,4-c]pyridine-1,4-dione (3j):** white solid (42mg, yield 59%),  $^1H$  NMR (500 MHz,  $DMSO-d_6$ )  $\delta$  7.97 – 7.91 (m, 4H), 7.88 (dd,  $J = 9.6, 7.4$  Hz, 2H), 7.54 – 7.48 (m, 2H), 7.45 – 7.33 (m, 4H), 6.89 (s, 1H), 6.57 (s, 1H).  $^{13}C$  NMR (126 MHz,  $DMSO$ )  $\delta$  195.68, 167.16, 162.75, 150.84, 136.27, 135.12, 134.58, 132.77, 130.05, 129.77, 129.34, 129.08, 128.26, 128.03, 127.64, 127.58, 127.21, 126.93, 124.97, 106.20, 82.72. HRMS (ESI)  $m/z$  calculated for  $C_{23}H_{16}NO_3^{2+} [M+H]^+$  354.1119, found: 354.1123.

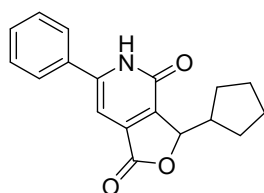

**3-cyclopentyl-6-phenyl-3,5-dihydrofuro[3,4-c]pyridine-1,4-dione (3k):** white solid (10mg, yield 17%),  $^1H$  NMR (500 MHz,  $DMSO-d_6$ )  $\delta$  12.44 (s, 1H), 7.81 (dd,  $J = 6.5, 3.0$  Hz, 2H), 7.51 (dd,  $J = 5.0, 1.9$  Hz, 3H), 6.80 (s, 1H), 5.65 (d,  $J = 3.3$  Hz, 1H), 2.78 (m, 1H), 1.92 (m,  $J = 11.0, 7.7, 3.9$  Hz, 1H), 1.70 – 1.58 (m, 2H), 1.58 – 1.42 (m, 2H), 1.32 (m, 1H), 0.98 (m, 1H).  $^{13}C$  NMR (126 MHz,  $DMSO$ )  $\delta$  169.92, 159.38, 150.05, 137.36, 133.20, 130.76, 129.35, 127.80, 97.83, 83.18, 29.28, 25.89, 25.67, 25.03. HRMS (ESI)  $m/z$  calculated for  $C_{18}H_{18}NO_3^+ [M+H]^+$  296.1281, found: 296.1279.



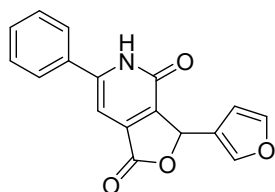

**3-(furan-3-yl)-6-phenyl-3,5-dihydrofuro[3,4-c]pyridine-1,4-dione (3l):** white solid (36mg, yield 61%),  $^1\text{H NMR}$  (500 MHz,  $\text{DMSO-}d_6$ )  $\delta$  7.93 – 7.82 (m, 3H), 7.69 – 7.62 (m, 1H), 7.48 – 7.41 (m, 3H), 6.83 (s, 1H), 6.50 (d,  $J = 1.7$  Hz, 1H), 6.47 – 6.41 (m, 1H).  $^{13}\text{C NMR}$  (126 MHz,  $\text{CDCl}_3$ )  $\delta$  194.30, 174.30, 171.56, 164.00, 155.61, 152.94, 149.31, 147.53, 142.07, 138.11, 135.56, 132.59, 131.88, 125.38, 114.37, 102.80, 79.95. HRMS (ESI)  $m/z$  calculated for  $\text{C}_{17}\text{H}_{11}\text{NNaO}_4^+$   $[\text{M}+\text{Na}]^+$  316.0580, found: 316.0580.

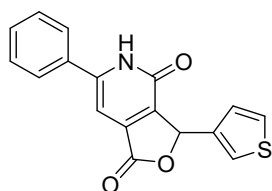

**6-phenyl-3-(thiophen-3-yl)-3,5-dihydrofuro[3,4-c]pyridine-1,4-dione (3m):** white solid (36mg, yield 58%),  $^1\text{H NMR}$  (500 MHz,  $\text{DMSO-}d_6$ )  $\delta$  7.94 – 7.83 (m, 2H), 7.65 (d,  $J = 2.9$  Hz, 1H), 7.53 (m, 1H), 7.49 – 7.43 (m, 3H), 7.13 (dd,  $J = 5.0, 1.2$  Hz, 1H), 6.83 (s, 1H), 6.55 (d,  $J = 3.0$  Hz, 1H).  $^{13}\text{C NMR}$  (126 MHz,  $\text{DMSO}$ )  $\delta$  188.61, 165.27, 143.35, 135.98, 135.01, 131.11, 129.69, 128.84, 128.27, 128.21, 126.77, 126.46, 126.04, 125.81, 125.33, 125.04, 76.92. HRMS (ESI)  $m/z$  calculated for  $\text{C}_{17}\text{H}_{12}\text{NO}_3\text{S}^+$   $[\text{M}+\text{H}]^+$  310.0532, found: 310.0532.

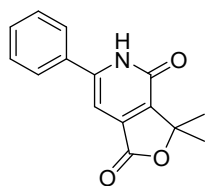

**3,3-dimethyl-6-phenyl-3,5-dihydrofuro[3,4-c]pyridine-1,4-dione (3n):** white solid (19mg, yield 38%),  $^1\text{H NMR}$  (500 MHz,  $\text{DMSO-}d_6$ )  $\delta$  12.43 (s, 1H), 7.76 (dd,  $J = 6.7, 2.9$  Hz, 2H), 7.49 (dd,  $J = 5.0, 1.9$  Hz, 3H), 6.74 (s, 1H), 1.63 (s, 6H).  $^{13}\text{C NMR}$  (126 MHz,  $\text{DMSO}$ )  $\delta$  168.67, 159.08, 150.29, 143.53, 136.28, 133.35, 130.72, 129.35, 127.83, 98.01, 86.14, 24.84. HRMS (ESI)  $m/z$  calculated for  $\text{C}_{15}\text{H}_{14}\text{NO}_3^+$   $[\text{M}+\text{H}]^+$  256.0968, found: 256.0990.

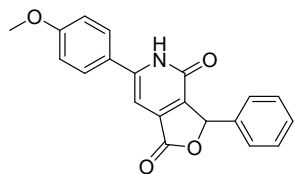

**6-(4-methoxyphenyl)-3-phenyl-3,5-dihydrofuro[3,4-c]pyridine-1,4-dione (3o):** white solid (55mg, yield 83%),  $^1\text{H NMR}$  (500 MHz,  $\text{DMSO-}d_6$ )  $\delta$  7.94 – 7.86 (m, 2H), 7.36 – 7.27 (m, 5H), 6.97 – 6.88 (m, 2H), 6.70 (s, 1H), 6.28 (s, 1H), 3.79 (s, 3H).  $^{13}\text{C NMR}$  (126 MHz, DMSO)  $\delta$  171.71, 159.39, 136.99, 134.19, 129.74, 128.91, 128.21, 128.10, 127.99, 127.85, 127.34, 126.40, 113.45, 93.22, 82.42, 55.02. HRMS (ESI)  $m/z$  calculated for  $\text{C}_{20}\text{H}_{16}\text{NO}_4^+$   $[\text{M}+\text{H}]^+$  334.1074, found: 334.1079.

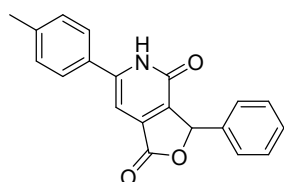

**3-phenyl-6-(p-tolyl)-3,5-dihydrofuro[3,4-c]pyridine-1,4-dione (3p):** white solid (43mg, yield 68%),  $^1\text{H NMR}$  (500 MHz,  $\text{DMSO-}d_6$ )  $\delta$  12.33 (s, 1H), 7.79 (d,  $J = 8.3$  Hz, 2H), 7.44 – 7.39 (m, 3H), 7.37 (dd,  $J = 6.8, 3.0$  Hz, 2H), 7.10 – 7.01 (m, 2H), 6.82 (s, 1H), 6.57 (s, 1H), 3.83 (s, 3H).  $^{13}\text{C NMR}$  (126 MHz, DMSO)  $\delta$  169.32, 160.89, 158.54, 136.62, 134.71, 129.11, 128.80, 128.59, 128.24, 127.49, 114.19, 81.59, 55.31. HRMS (ESI)  $m/z$  calculated for  $\text{C}_{20}\text{H}_{15}\text{KNO}_3^+$   $[\text{M}+\text{K}]^+$  356.0684, found: 356.0688.

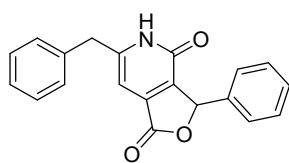

**6-benzyl-3-phenyl-3,5-dihydrofuro[3,4-c]pyridine-1,4-dione (3q):** white solid (43mg, yield 68%),  $^1\text{H NMR}$  (500 MHz,  $\text{DMSO-}d_6$ )  $\delta$  12.43 (s, 1H), 7.40 – 7.30 (m, 9H), 7.29 – 7.24 (m, 1H), 6.48 (s, 1H), 6.37 (s, 1H), 3.94 (s, 2H).  $^{13}\text{C NMR}$  (126 MHz, DMSO)  $\delta$  169.90, 158.94, 153.02, 138.56, 137.59, 136.98, 135.16, 129.63, 129.48, 129.13, 127.96, 127.40, 98.00, 82.15, 38.41. HRMS (ESI)  $m/z$  calculated for  $\text{C}_{20}\text{H}_{16}\text{NO}_3^+$   $[\text{M}+\text{H}]^+$  318.1125, found: 318.1121.

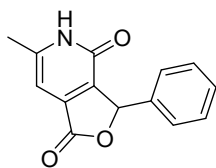

**6-methyl-3-phenyl-3,5-dihydrofuro[3,4-c]pyridine-1,4-dione (3r):** white solid (10mg, yield 20%),  $^1\text{H NMR}$  (500 MHz,  $\text{DMSO-}d_6$ )  $\delta$  12.22 (s, 1H), 7.41 – 7.35 (m, 3H), 7.30 (m, 2H), 6.47 (s, 1H), 6.41 (d,  $J = 15.2$  Hz, 1H), 2.28 (s, 3H).  $^{13}\text{C NMR}$  (126 MHz,  $\text{DMSO}$ )  $\delta$  169.98, 158.89, 150.18, 137.94, 136.97, 135.33, 129.63, 129.38, 129.12, 128.34, 127.95, 98.11, 82.11, 19.22. HRMS (ESI)  $m/z$  calculated for  $\text{C}_{14}\text{H}_{12}\text{NO}_3^+$   $[\text{M}+\text{H}]^+$  242.0812, found: 242.0810.

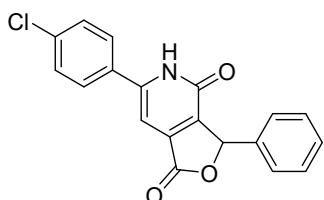

**6-(4-chlorophenyl)-3-phenyl-3,5-dihydrofuro[3,4-c]pyridine-1,4-dione (3s):** white solid (42mg, yield 63%),  $^1\text{H NMR}$  (500 MHz,  $\text{DMSO-}d_6$ )  $\delta$  12.49 (s, 1H), 7.85 (s, 2H), 7.58 (d,  $J = 8.5$  Hz, 2H), 7.45 – 7.40 (m, 3H), 7.37 (dd,  $J = 6.8, 3.1$  Hz, 2H), 6.91 (s, 1H), 6.60 (s, 1H).  $^{13}\text{C NMR}$  (126 MHz,  $\text{DMSO}$ )  $\delta$  169.11, 158.45, 136.57, 135.05, 134.49, 129.22, 129.16, 128.74, 128.60, 127.51, 81.60. HRMS (ESI)  $m/z$  calculated for  $\text{C}_{19}\text{H}_{12}\text{ClKNO}_3^+$   $[\text{M}+\text{K}]^+$  376.0137, found: 376.0138.

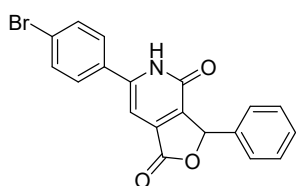

**6-(4-bromophenyl)-3-phenyl-3,5-dihydrofuro[3,4-c]pyridine-1,4-dione (3t):** white solid (46mg, yield 60%),  $^1\text{H NMR}$  (500 MHz,  $\text{DMSO-}d_6$ )  $\delta$  12.49 (s, 1H), 7.88 – 7.68 (m, 4H), 7.43 – 7.35 (m, 5H), 6.91 (s, 1H), 6.59 (s, 1H).  $^{13}\text{C NMR}$  (126 MHz,  $\text{DMSO}$ )  $\delta$  169.10, 158.45, 134.48, 131.67, 129.42, 129.16, 128.60, 127.51, 123.85, 81.60. HRMS (ESI)  $m/z$  calculated for  $\text{C}_{19}\text{H}_{13}\text{BrNO}_3^+$   $[\text{M}+\text{H}]^+$  382.0073, found: 382.0071.

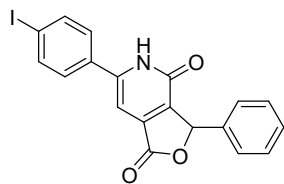

**6-(4-iodophenyl)-3-phenyl-3,5-dihydrofuro[3,4-c]pyridine-1,4-dione (3u):** white solid (46mg, yield 60%),  $^1\text{H NMR}$  (500 MHz,  $\text{DMSO-}d_6$ )  $\delta$  12.46 (s, 1H), 7.94 – 7.81 (m, 2H), 7.68 – 7.56 (m, 2H), 7.48 – 7.33 (m, 5H), 6.91 (s, 1H), 6.58 (s, 1H).  $^{13}\text{C NMR}$  (126 MHz,  $\text{DMSO}$ )  $\delta$  169.13, 158.49, 137.53, 136.59, 134.49, 129.29, 129.16, 128.61, 127.52, 97.50, 81.62. HRMS (ESI)  $m/z$  calculated for  $\text{C}_{19}\text{H}_{13}\text{INO}_3^+$   $[\text{M}+\text{H}]^+$  429.9935, found: 429.9932.

### NOESY Experiments for Product 3a, 3h, 3n, 3p, 3q

#### 1) NOESY spectra of product 3a

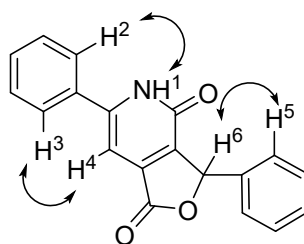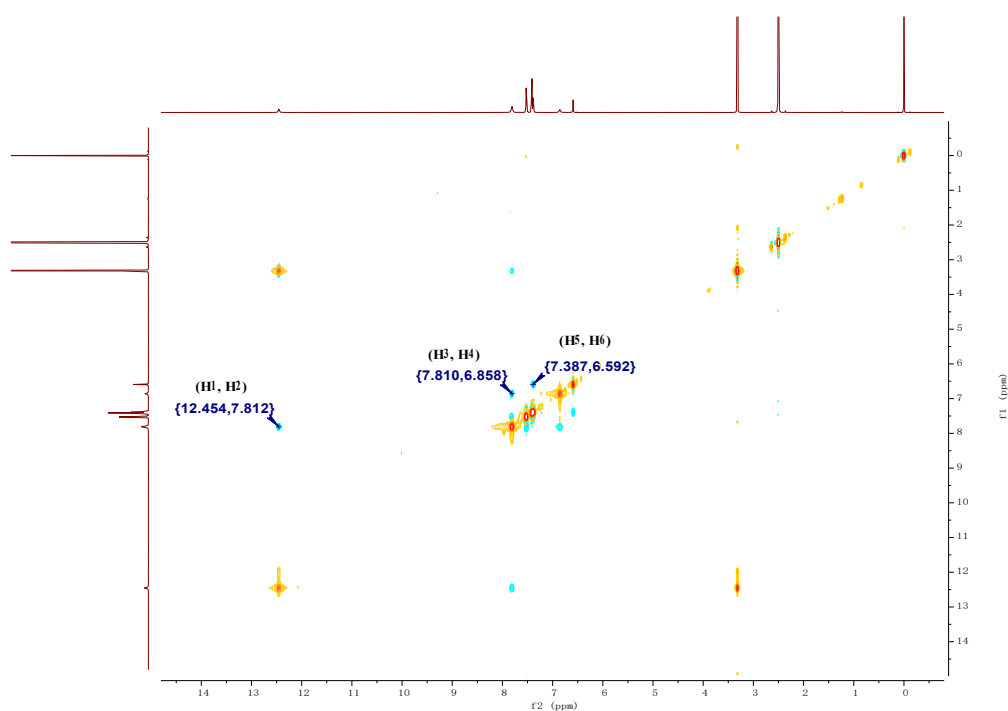

2) NOESY spectra of product **3h**

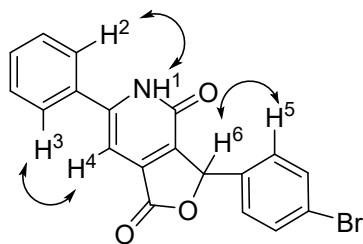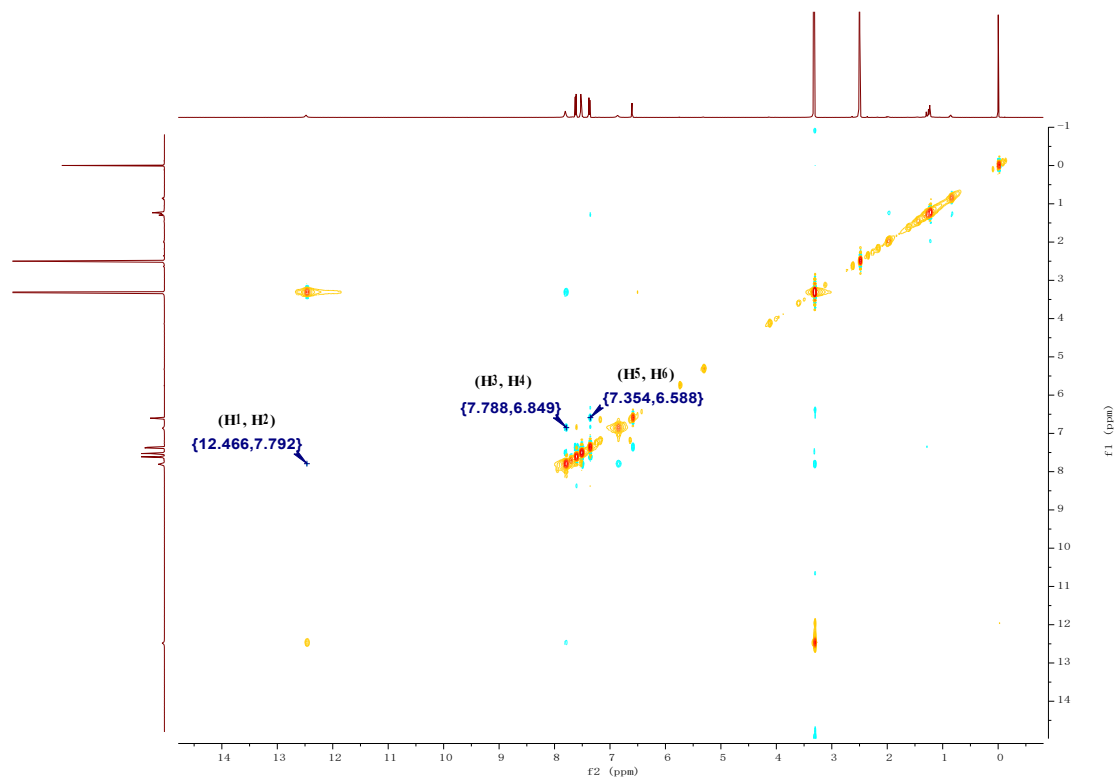

3) NOESY spectra of product **3n**

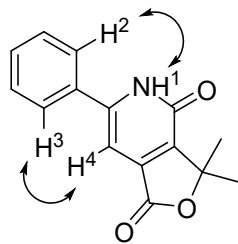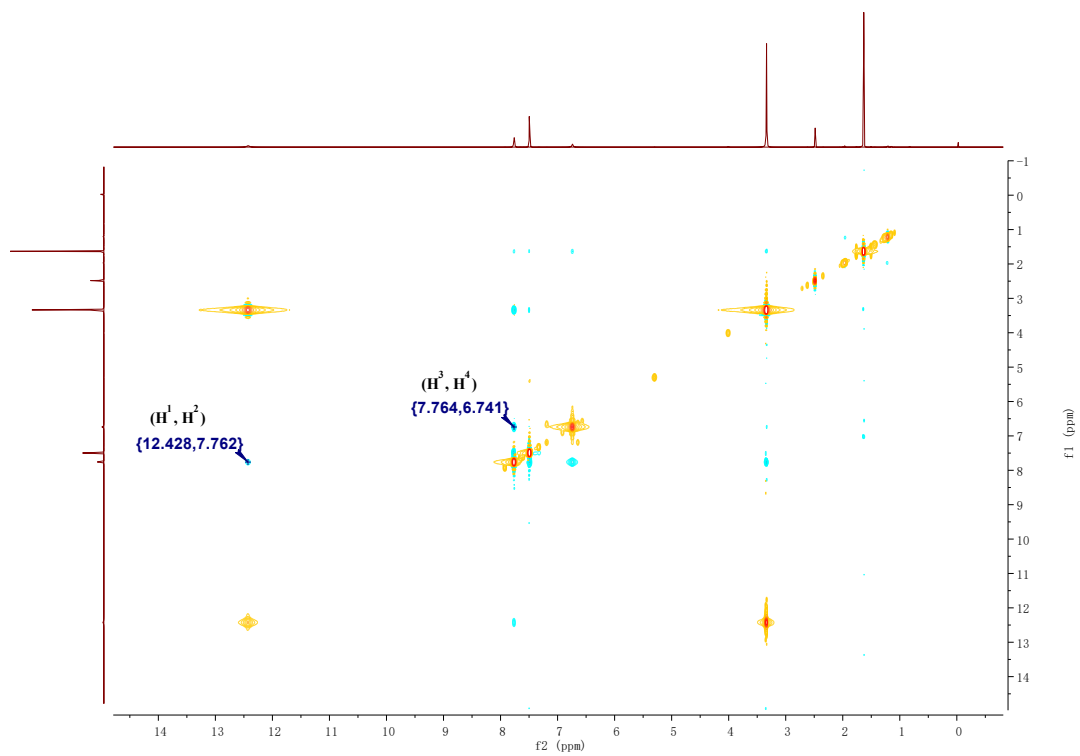

4) NOESY spectra of product **3p**

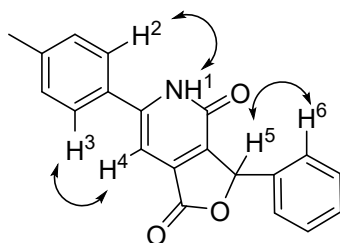

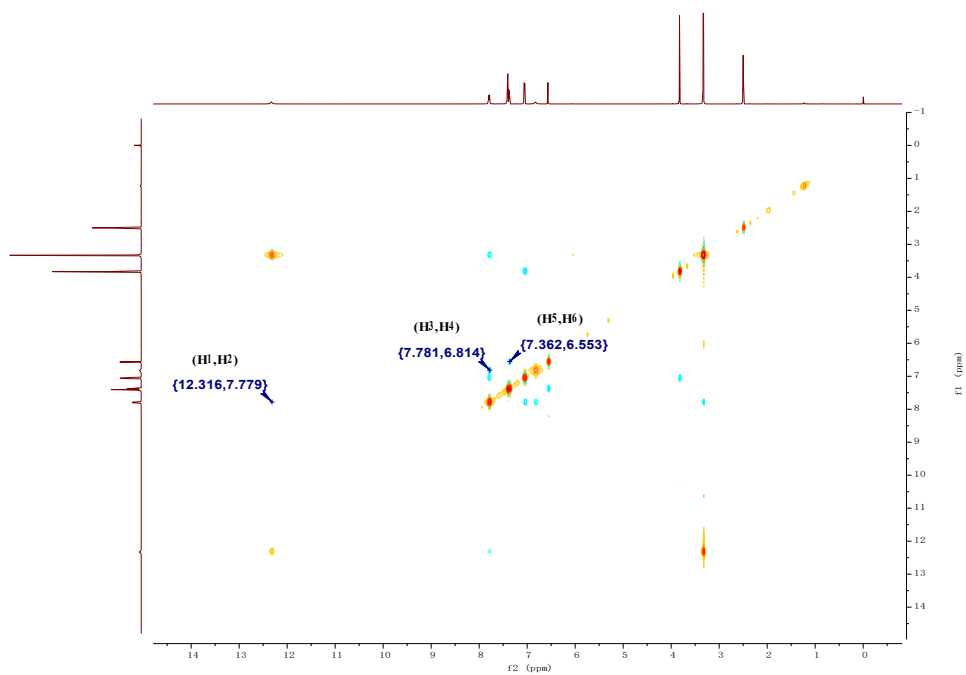

5) NOESY spectra of product 3q

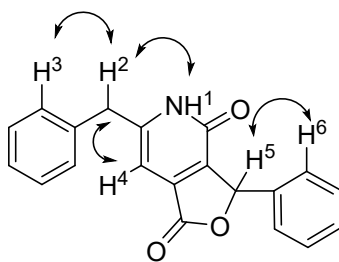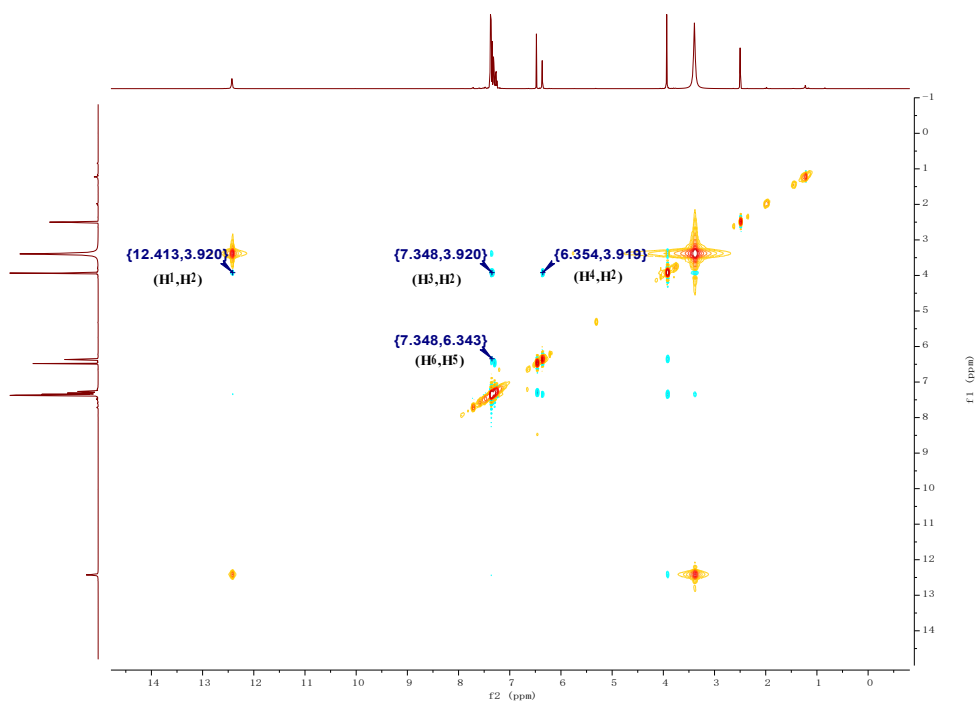

## Mechanistic Experiments

### Deuterium Incorporation Experiment A

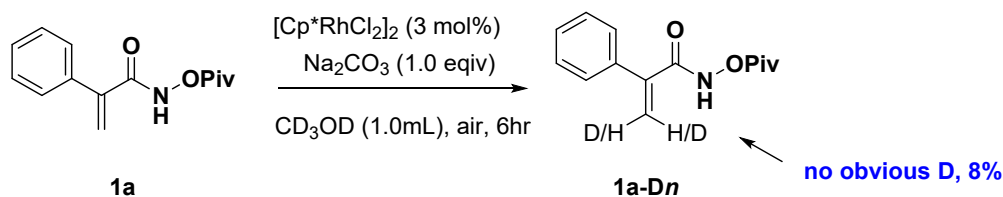

To a mixture of **1a** (49.5 mg, 0.2 mmol, 1.0 eq.),  $[\text{Cp}^*\text{RhCl}_2]_2$  (3.7 mg, 0.006 mmol, 3 mol%) and  $\text{Na}_2\text{CO}_3$  (21.2 mg, 0.2 mmol, 1.0 eq.) in a 10 mL reaction tube was added  $\text{CD}_3\text{OD}$  (1.0 mL). Then the resulting mixture was stirred at the temperature for 6.0 h. After removal of the solvents under vacuum, the residue obtained was directly used for  $^1\text{H}$  NMR analysis. The reaction of **1a** (49.5 mg, 0.2 mmol, 1.0 eq.) without **2a** provided the product **1a-D<sub>n</sub>**. Found no obvious H/D exchange occurred at the olefinic bond of the **1a** (8% D).

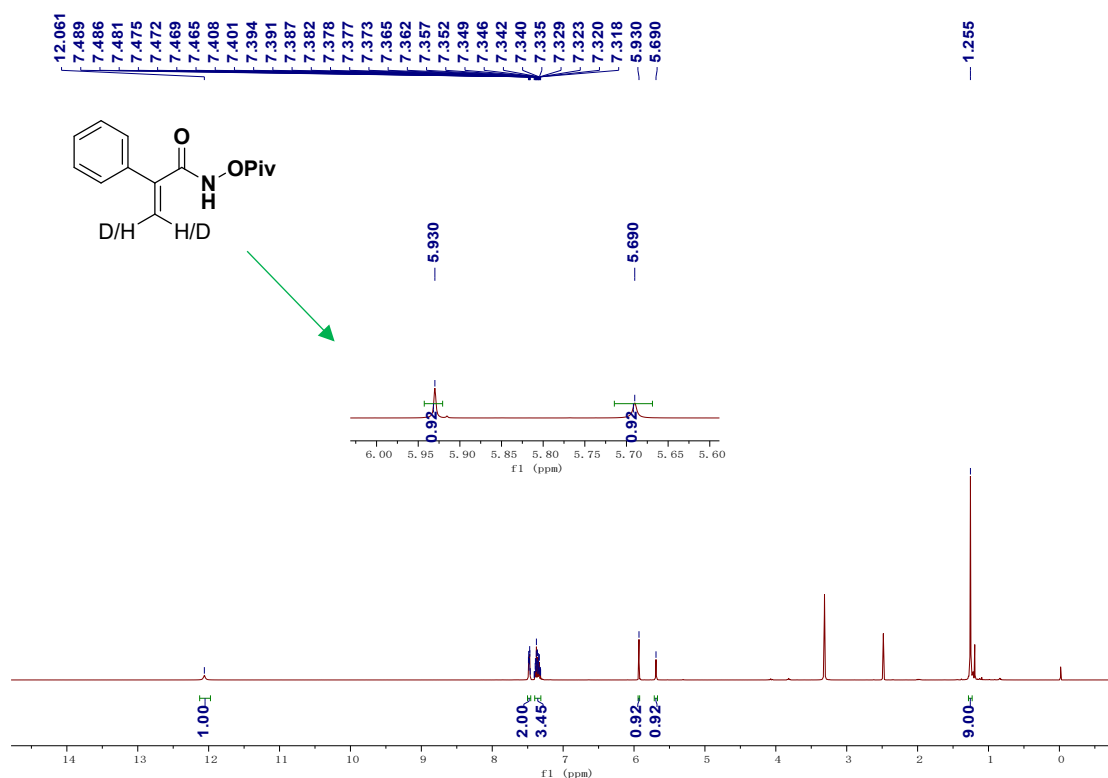

### Deuterium Incorporation Experiment B

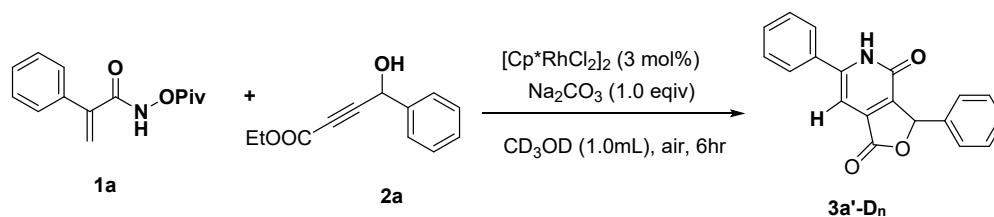



To a mixture of **1a** (49.5 mg, 0.2 mmol, 1.0 eq.), **2a** (49.0 mg, 0.24 mmol, 1.2 eq.), [Cp\*RhCl<sub>2</sub>]<sub>2</sub> (3.7 mg, 0.006 mmol, 3 mmol%) and Na<sub>2</sub>CO<sub>3</sub> (21.2 mg, 0.2mmol, 1.0 eq.) in a 10 mL reaction tube was added CD<sub>3</sub>OD (1.0 mL). Then the resulting mixture was stirred at the temperature for 6.0 h. After removal of the solvents under vacuum, the residue obtained was directly used for <sup>1</sup>H NMR analysis.

The reaction of **1a** (49.5 mg, 0.2 mmol, 1.0 eq.) with **2a** (51.7 mg, 0.3 mmol, 1.5 eq.) provided the product **3a-D<sub>n</sub>**, found almost no deuterium incorporation at the hydrogen of the olefinic bond.

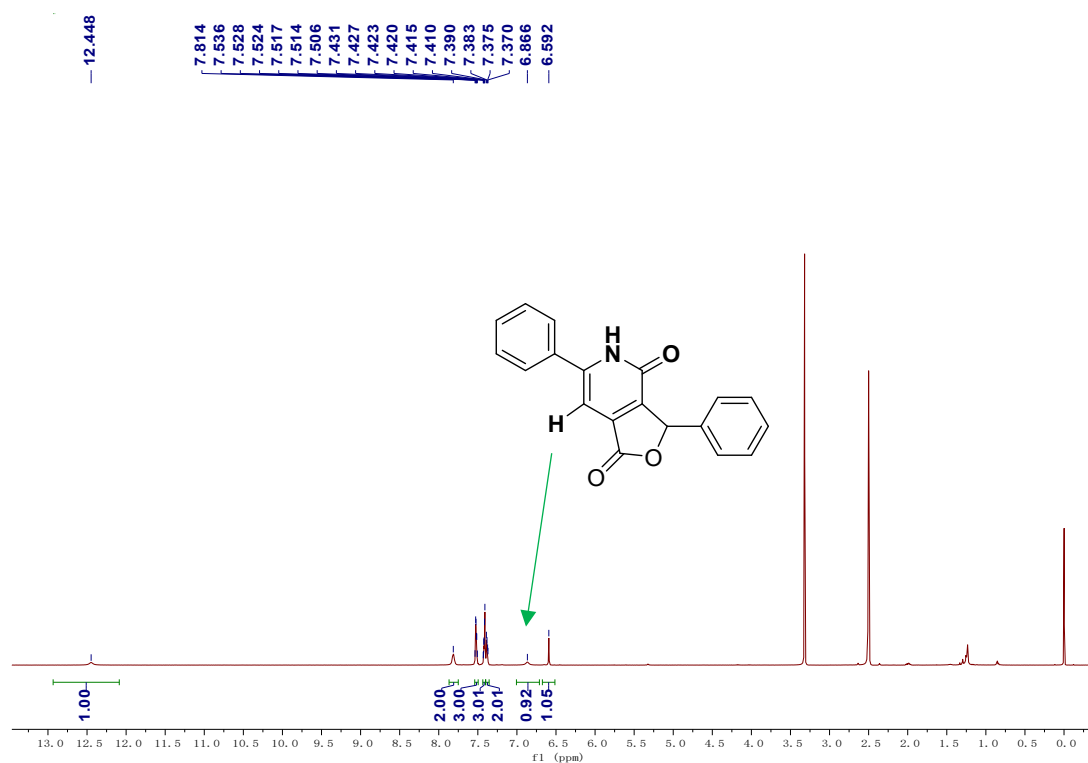

## Determination of the KIE

Two parallel reactions for KIE value measurement

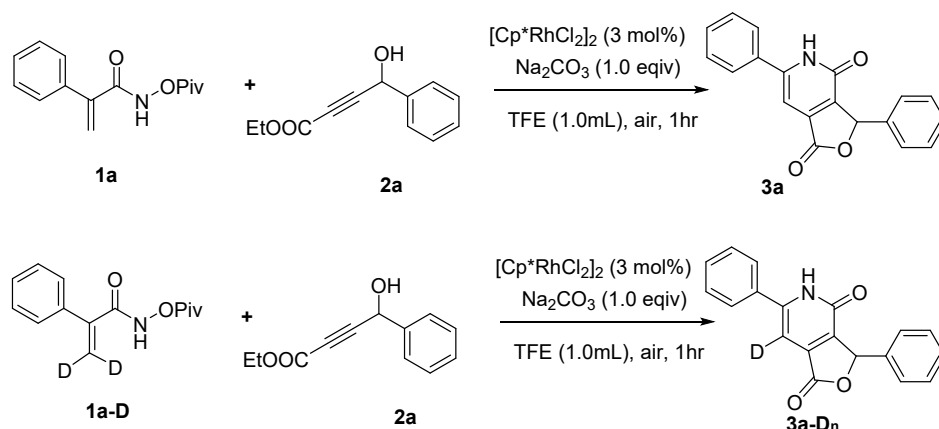

To a mixture of **1a** (49.5 mg, 0.2 mmol, 1.0 eq.), **2a** (49.0 mg, 0.24 mmol, 1.2 eq.),  $[\text{Cp}^*\text{RhCl}_2]_2$  (3.7 mg, 0.006 mmol, 3 mol%) and  $\text{Na}_2\text{CO}_3$  (21.2 mg, 0.2 mmol, 1.0 eq.) in a 10 mL reaction tube was added TFE (1.0 mL). Then the resulting mixture was stirred at the temperature for 1.0 h. The reaction was finished to provide the product **3a** (29.0 mg, 48% yield).

To a mixture of **1a-D** (49.8 mg, 0.2 mmol, 1.0 eq.), **2a** (49.0 mg, 0.24 mmol, 1.2 eq.),  $[\text{Cp}^*\text{RhCl}_2]_2$  (3.7 mg, 0.006 mmol, 3 mol%) and  $\text{Na}_2\text{CO}_3$  (21.2 mg, 0.2 mmol, 1.0 eq.) in a 10 mL reaction tube was added EA (1.0 mL). Then the resulting mixture was stirred at the temperature for 1.0 h. The reaction was finished to provide the product **3a-D<sub>n</sub>** (30 mg, 49% yield). The ratio of **3aa/3aa-D<sub>n</sub>** was 0.98 (0.48/0.49)

#### X-ray data of compound 3o-1 (3o-1 is a lactone ring-opening structure of 3o, CCDC 2281784)

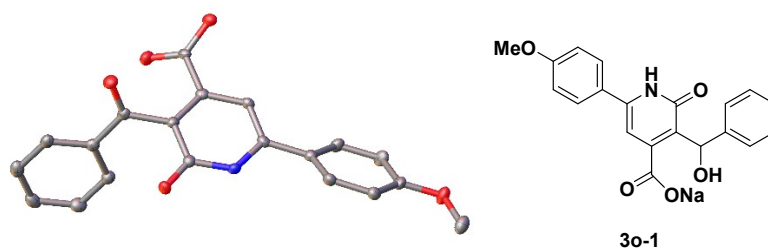

**Table S1.** Crystal data and structure refinement for compound **3o-1**.<sup>a</sup>

| Identification code | <b>3o-1</b>                                                    |
|---------------------|----------------------------------------------------------------|
| Empirical formula   | $\text{C}_{43}\text{H}_{43}\text{N}_3\text{Na}_2\text{O}_{15}$ |
| Formula weight      | 887.8                                                          |
| Temperature/K       | 150                                                            |
| Crystal system      | orthorhombic                                                   |
| Space group         | P n a 21                                                       |
| a/Å                 | 12.0888(6)                                                     |
| b/Å                 | 11.2367(5)                                                     |

|                                             |                                                   |
|---------------------------------------------|---------------------------------------------------|
| c/Å                                         | 29.9061(11)                                       |
| $\alpha$ /°                                 | 90                                                |
| $\beta$ /°                                  | 90                                                |
| $\gamma$ /°                                 | 90                                                |
| Volume/Å <sup>3</sup>                       | 4062.4(3)                                         |
| Z                                           | 4                                                 |
| $\rho_{\text{calc}}$ /cm <sup>3</sup>       | 1.452                                             |
| $\mu$ /mm <sup>-1</sup>                     | 0.707                                             |
| F(000)                                      | 1861.9                                            |
| Crystal size/mm <sup>3</sup>                | 0.01 × 0.01 × 0.02                                |
| Radiation                                   | Ga K $\alpha$ ( $\lambda$ = 1.34050)              |
| 2 $\Theta$ range for data collection/°      | 2.5630 to 60.3280                                 |
| Index ranges                                | -15 ≤ h ≤ 15, -14 ≤ k ≤ 14, -37 ≤ l ≤ 38          |
| Reflections collected                       | 7034                                              |
| Data/restraints/parameters                  | 3689/1/581                                        |
| Goodness-of-fit on F <sup>2</sup>           | 1.0430                                            |
| Final R indexes [ $I \geq 2\sigma(I)$ ]     | R <sub>1</sub> = 0.0374, wR <sub>2</sub> = 0.0935 |
| Final R indexes [all data]                  | R <sub>1</sub> = 0.0450, wR <sub>2</sub> = 0.0886 |
| Largest diff. peak/hole / e Å <sup>-3</sup> | 0.5323/-0.2566                                    |

---

<sup>a</sup>Note: We got the crystal structure of **3o** derivative (**3o-1**), in which the lactone ring of **3o** was open and formed sodium carboxylate salt. We provided the X-ray crystallography data of ring-opening structure of **3o** in the revised SI (**3o-1**, CCDC number: 2281784).

## Computational Mechanistic Studies

### Computational details:

Density functional theory (DFT)<sup>3</sup> calculations were performed by using Gaussian 09 quantum chemical package.<sup>4</sup> Unless otherwise specified, geometry optimizations were performed using B3LYP<sup>5</sup> functional with Grimme D3 correction (EmpiricalDispersion=GD3BJ).<sup>6</sup> Herein, the Stuttgart/Dresden effective core potential (SDD)<sup>7</sup> was used for Rh in conjunction with a standard 6-31G(d,p) basis set<sup>8</sup> for all other atoms. This level of theory is denoted as B3LYP-D3(BJ)/6-31G(d,p) SDD or B3D3/BS1. Frequency analysis was conducted at the same level of theory to verify the stationary points to be real minima or saddle points and to obtain the thermodynamic energy corrections. Intrinsic reaction coordinate (IRC) calculations<sup>9</sup> were carried out to confirm that all transition state structures connect the corresponding reactants and products. Solvent effects in 2,2,2-

TriFluoroEthanol (TFE) were estimated by using the SMD<sup>10</sup> solvation method at the M06<sup>11</sup> level of theory with Grimme D3 correction (EmpiricalDispersion=GD3). Herein, SDD was used for Rh and 6-31G(d,p) basis set was used for hydrogen atoms meanwhile the 6-311++G(d,p) basis set was used for all other atoms. This level of theory is denoted as M06-D3 SMD/6-311++G(d,p) SDD or M06D3 SMD/BS2. If not noted, the energies presented in this paper are the (M06D3 SMD/BS2)-calculated single point energies with (B3D3/BS1)-calculated thermodynamic corrections which were calculated under standard conditions (1 atm and 298.15 K) (denoted as  $\Delta G_{\text{sol}}(\text{M06-D3 SMD/6-311++G(d,p) SDD//B3LYP-D3(BJ)/6-31G(d,p) SDD})$  or  $\Delta G$  for clarity). The 3D diagrams of optimized structures are illustrated using CYLView.<sup>12</sup>

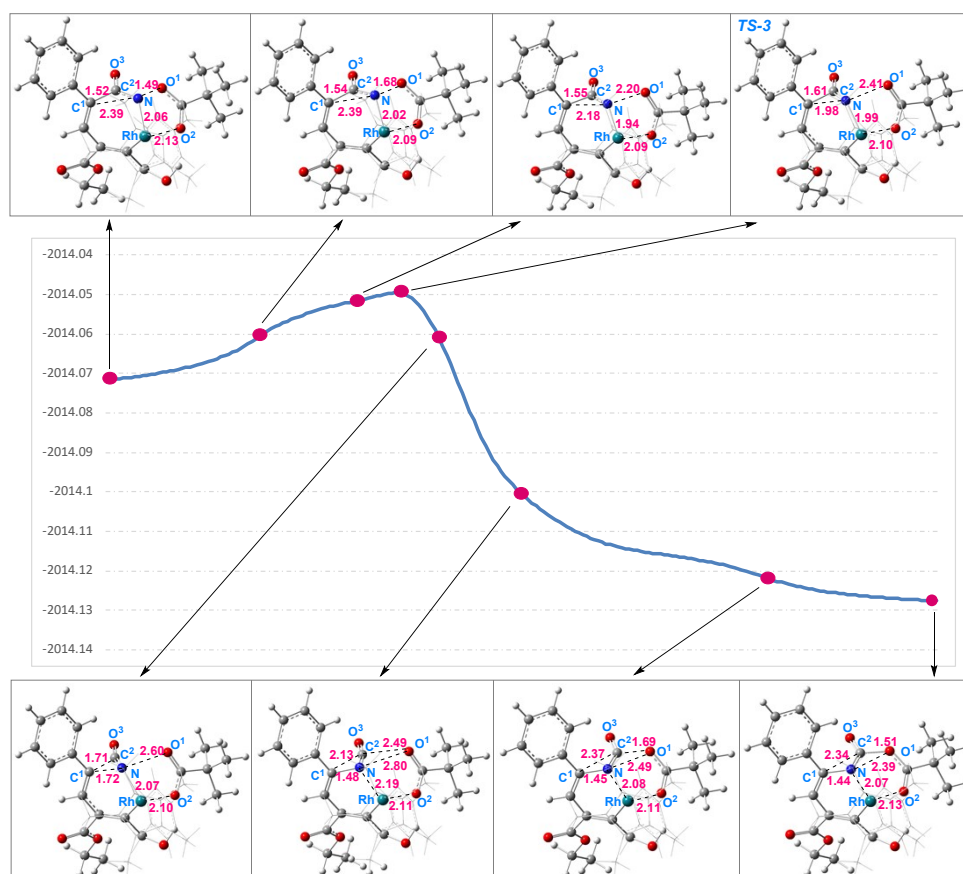

Figure S1. the geometry change along the intrinsic reaction coordinate (IRC) corresponding with TS-3

### Various energy values for the reported species and imaginary frequencies for the transition states

Table S1. Energy, enthalpy and free energy corrections of the structures calculated at B3LYP-

D3(BJ)/6-31G(d,p) SDD, single point energies at the M06-D3 SMD/6-311++G(d,p) SDD//B3LYP-D3(BJ)/6-31G(d,p) SDD level (in Hartree) and imaginary frequencies (in cm<sup>-1</sup>) of the transition states.

| Structures       | corr. to ZPE | corr. to <i>E</i> | corr. to <i>H</i> | corr. to <i>G</i> | SP <sub>SMD</sub> | Imaginary frequency |
|------------------|--------------|-------------------|-------------------|-------------------|-------------------|---------------------|
| 2a               | 0.214498     | 0.229484          | 0.230428          | 0.168075          | -689.843664       | —                   |
| HOAc             | 0.062006     | 0.066586          | 0.067531          | 0.034715          | -229.036865       | —                   |
| Cp*Rh(OAc)(OPiv) | 0.411727     | 0.439702          | 0.440646          | 0.353085          | -1075.268944      | —                   |
| EtOH             | 0.080204     | 0.084486          | 0.085431          | 0.054825          | -154.989869       | —                   |
| PC               | 0.277946     | 0.295268          | 0.296212          | 0.230832          | -1011.893720      | —                   |
| INT-0            | 0.488166     | 0.520121          | 0.521066          | 0.424395          | -1323.081328      | —                   |
| INT-1            | 0.707712     | 0.754282          | 0.755227          | 0.628139          | -2012.978727      | —                   |
| TS-1             | 0.706370     | 0.752772          | 0.753717          | 0.624637          | -2012.964423      | -399.06             |
| INT-2            | 0.708800     | 0.755092          | 0.628979          | 0.628979          | -2013.018542      | —                   |
| TS-2             | 0.708598     | 0.754161          | 0.755105          | 0.630803          | -2013.008086      | -154.74             |
| INT-3            | 0.710213     | 0.755844          | 0.756789          | 0.632762          | -2013.020534      | —                   |
| TS-3             | 0.705707     | 0.751987          | 0.752931          | 0.626506          | -2013.001913      | -351.79             |
| INT-4            | 0.709984     | 0.755898          | 0.756842          | 0.630809          | -2013.078182      | —                   |
| TS-4             | 0.708570     | 0.754396          | 0.755340          | 0.628693          | -2013.068435      | -72.34              |
| INT-5            | 0.708211     | 0.755185          | 0.756129          | 0.625890          | -2013.074173      | —                   |
| TS-5             | 0.707436     | 0.753902          | 0.754846          | 0.626496          | -2013.058696      | -185.80             |
| INT-6            | 0.708875     | 0.755476          | 0.756420          | 0.628902          | -2013.076463      | —                   |
| TS-6             | 0.707316     | 0.753907          | 0.754851          | 0.626586          | -2013.070315      | -150.62             |
| INT-7            | 0.707545     | 0.754081          | 0.755025          | 0.627403          | -2013.074825      | —                   |
| TS-7             | 0.706020     | 0.751719          | 0.752664          | 0.625949          | -2013.046231      | -519.05             |
| INT-8            | 0.709339     | 0.754750          | 0.755694          | 0.629940          | -2013.110663      | —                   |
| INT-9            | 0.708422     | 0.754301          | 0.755245          | 0.628233          | -2013.091863      | —                   |
| TS-8             | 0.704990     | 0.750457          | 0.751401          | 0.625790          | -2013.091180      | -764.10             |
| INT-10           | 0.709555     | 0.756011          | 0.756955          | 0.627792          | -2013.111598      | —                   |
| TS-9             | 0.710534     | 0.755072          | 0.756016          | 0.633649          | -2013.095321      | -74.44              |
| INT-4i           | 0.706854     | 0.753665          | 0.754610          | 0.626552          | -2012.987038      | —                   |
| TS-4i            | 0.706320     | 0.752467          | 0.753411          | 0.627132          | -2012.987810      | -49.24              |
| TS-3ii           | 0.708815     | 0.753929          | 0.754873          | 0.630447          | -2012.986325      | -357.43             |
| INT-4ii          | 0.710463     | 0.755790          | 0.756734          | 0.632688          | -2013.022200      | —                   |
| TS-5i            | 0.706841     | 0.753023          | 0.753967          | 0.627137          | -2013.039625      | -452.56             |
| INT-6i           | 0.711634     | 0.757295          | 0.758240          | 0.632457          | -2013.137003      | —                   |
| INT-10i          | 0.360804     | 0.383523          | 0.384467          | 0.306322          | -1166.892244      | —                   |
| TS-9i            | 0.355709     | 0.377634          | 0.378578          | 0.302891          | -1166.817638      | -1126.96            |

**Cartesian coordinates of the optimized structures**

2a

C -1.77733700 0.70427000 -0.19881900

|   |             |             |             |
|---|-------------|-------------|-------------|
| C | -0.86514300 | 0.08268800  | 0.29888200  |
| C | 0.21289500  | -0.68609500 | 0.93737300  |
| O | 0.25586400  | -0.46028600 | 2.34224500  |
| H | -0.65375000 | -0.45801100 | 2.66728300  |
| H | 0.02775300  | -1.75197100 | 0.72442000  |
| C | 1.55794700  | -0.30736000 | 0.33329600  |
| C | 2.33597400  | 0.69411400  | 0.91759100  |
| C | 1.99736500  | -0.93883300 | -0.83254900 |
| C | 3.55206600  | 1.05560600  | 0.33807700  |
| H | 1.98752100  | 1.16844600  | 1.82747000  |
| C | 3.21001600  | -0.57161400 | -1.41404300 |
| H | 1.38909100  | -1.71698500 | -1.28626700 |
| C | 3.99043200  | 0.42685200  | -0.82847000 |
| H | 4.15804400  | 1.83021600  | 0.79858500  |
| H | 3.54708000  | -1.06777400 | -2.31905000 |
| H | 4.93732900  | 0.71075700  | -1.27771600 |
| C | -2.83359200 | 1.42338500  | -0.87396400 |
| O | -3.12195700 | 1.27509600  | -2.04378700 |
| O | -3.45345200 | 2.27407200  | -0.03284500 |
| C | -4.52803600 | 3.04686800  | -0.61972800 |
| C | -5.08169100 | 3.94386200  | 0.46866500  |
| H | -5.28174500 | 2.35793200  | -1.01334900 |
| H | -4.12962200 | 3.61687100  | -1.46447100 |
| H | -5.89991600 | 4.54993800  | 0.06824600  |
| H | -5.46684000 | 3.35178300  | 1.30345800  |
| H | -4.30802500 | 4.61591300  | 0.84997100  |

#### HOAc

|   |             |             |             |
|---|-------------|-------------|-------------|
| C | -0.09230100 | 0.12513500  | -0.00000800 |
| O | -0.64460700 | 1.20202200  | -0.00003500 |
| O | -0.77806500 | -1.04599300 | -0.00001400 |
| H | -1.71910600 | -0.80340100 | -0.00004500 |
| C | 1.39615600  | -0.10987700 | 0.00004900  |
| H | 1.68113500  | -0.69192000 | 0.88127100  |
| H | 1.68119400  | -0.69199000 | -0.88110800 |
| H | 1.91502700  | 0.84752600  | 0.00003000  |

#### Cp\*Rh(OAc)(OPiv)

|    |             |             |             |
|----|-------------|-------------|-------------|
| Rh | -0.65129200 | 0.22273500  | 0.06702300  |
| C  | -1.52749800 | -1.37448400 | -1.10742300 |
| C  | -1.13011000 | -1.90473100 | 0.16483300  |
| C  | -1.82682100 | -1.17681000 | 1.19154100  |
| C  | -2.72368600 | -0.23264200 | 0.53679100  |
| C  | -2.53599900 | -0.34861900 | -0.86962600 |

|   |             |             |             |
|---|-------------|-------------|-------------|
| C | 0.02498300  | 2.65084100  | -0.09569600 |
| O | -0.43609400 | 2.17903700  | 0.99455200  |
| O | -0.00695800 | 1.91488400  | -1.13485300 |
| O | 1.34649400  | 0.10731200  | 0.54028500  |
| C | 2.16817200  | -0.49329700 | -0.27495500 |
| O | 1.84682200  | -1.14834400 | -1.26986700 |
| C | -3.63538200 | 0.70747000  | 1.25765800  |
| H | -4.50280900 | 0.16765800  | 1.65574300  |
| H | -3.11727000 | 1.18237400  | 2.09436600  |
| H | -3.99920100 | 1.49741500  | 0.59869800  |
| C | -3.22229000 | 0.43651300  | -1.94148500 |
| H | -4.00435700 | -0.16741500 | -2.41676400 |
| H | -3.68660000 | 1.33935500  | -1.54090200 |
| H | -2.51271700 | 0.73963900  | -2.71474800 |
| C | -1.73377900 | -1.39985900 | 2.66720500  |
| H | -1.87413300 | -0.46440200 | 3.21374500  |
| H | -2.50367700 | -2.10622900 | 3.00215800  |
| H | -0.75886800 | -1.80548400 | 2.94365800  |
| C | -0.13621600 | -3.00000000 | 0.37854200  |
| H | 0.31964600  | -2.92944000 | 1.36803600  |
| H | -0.63477700 | -3.97413500 | 0.30243600  |
| H | 0.65736000  | -2.94068000 | -0.36610900 |
| C | -1.03790900 | -1.84207100 | -2.43946100 |
| H | 0.04725600  | -1.95396100 | -2.41219300 |
| H | -1.49946900 | -2.80255300 | -2.70030200 |
| H | -1.28653700 | -1.12365600 | -3.22307500 |
| C | 0.64440400  | 4.01835800  | -0.14263300 |
| H | 1.71502100  | 3.91481800  | 0.06366600  |
| H | 0.52740500  | 4.45728000  | -1.13506800 |
| H | 0.20598200  | 4.66411000  | 0.62011100  |
| C | 3.64777700  | -0.31203600 | 0.13499900  |
| C | 3.96133800  | 1.19614200  | 0.17508100  |
| C | 3.84377900  | -0.91829000 | 1.53792100  |
| C | 4.55792200  | -1.01616000 | -0.87750000 |
| H | 3.79740500  | 1.65467800  | -0.80614100 |
| H | 3.32234000  | 1.70218200  | 0.90254000  |
| H | 5.00868300  | 1.35870400  | 0.45396500  |
| H | 3.61289800  | -1.98970800 | 1.53670800  |
| H | 4.88441400  | -0.80049000 | 1.86029000  |
| H | 3.19352300  | -0.42700800 | 2.26550700  |
| H | 5.60737200  | -0.89776800 | -0.58517300 |
| H | 4.32977200  | -2.08356500 | -0.93361600 |
| H | 4.42528300  | -0.59986100 | -1.87925700 |

**EtOH**

|   |             |             |             |
|---|-------------|-------------|-------------|
| O | -1.14924500 | -0.39882500 | -0.00001600 |
| C | -0.08763600 | 0.54861000  | -0.00001300 |
| C | 1.22150600  | -0.22229200 | 0.00000100  |
| H | -0.13631700 | 1.20151600  | 0.88679900  |
| H | -0.13635700 | 1.20155600  | -0.88679600 |
| H | 2.07370400  | 0.46449500  | 0.00011200  |
| H | 1.28652500  | -0.86048500 | 0.88602100  |
| H | 1.28668200  | -0.86040900 | -0.88605700 |
| H | -1.98349800 | 0.08602200  | 0.00012200  |

**PC**

|   |             |             |             |
|---|-------------|-------------|-------------|
| N | 1.21389500  | -1.08020300 | -0.54016300 |
| C | 1.92731900  | 0.02983000  | -0.14689400 |
| C | 1.28678900  | 1.24526900  | -0.09548900 |
| C | -0.14096600 | -1.14414400 | -0.92829700 |
| O | -0.63114000 | -2.20661000 | -1.30261700 |
| C | -0.08120300 | 1.25490400  | -0.44553700 |
| C | -0.77958900 | 0.14574500  | -0.81955300 |
| C | -2.21249000 | 0.52037000  | -1.09827200 |
| O | -2.21987400 | 1.95732100  | -0.93638800 |
| H | -2.48424700 | 0.30772200  | -2.13915900 |
| C | -3.21285400 | -0.13323300 | -0.15760000 |
| C | -3.80567800 | 0.58835000  | 0.88077700  |
| C | -3.52379500 | -1.48667400 | -0.33146200 |
| C | -4.70495400 | -0.04180800 | 1.74261800  |
| H | -3.57753500 | 1.64084600  | 1.00122300  |
| C | -4.41961500 | -2.11108400 | 0.53438100  |
| H | -3.03675100 | -2.05052500 | -1.11942800 |
| C | -5.01369000 | -1.39113000 | 1.57293700  |
| H | -5.16673100 | 0.52677200  | 2.54435400  |
| H | -4.65332400 | -3.16250900 | 0.39645800  |
| H | -5.71448100 | -1.87919100 | 2.24371500  |
| C | 3.35455200  | -0.16353500 | 0.17140900  |
| C | 4.13431300  | -1.09234700 | -0.53651300 |
| C | 3.95439500  | 0.59137100  | 1.19142400  |
| C | 5.48243400  | -1.26181000 | -0.22895100 |
| H | 3.69840800  | -1.65648600 | -1.35604400 |
| C | 5.30252100  | 0.42104500  | 1.49411300  |
| H | 3.35211600  | 1.29175300  | 1.76027000  |
| C | 6.07001600  | -0.50692500 | 0.78703600  |
| H | 6.07596800  | -1.97616700 | -0.79066600 |
| H | 5.75214600  | 1.00580800  | 2.29038100  |
| H | 7.12022900  | -0.64044500 | 1.02652700  |



|   |             |             |             |
|---|-------------|-------------|-------------|
| H | 1.81114900  | 2.15645200  | 0.15639400  |
| C | -1.00094200 | 2.42225300  | -0.51512500 |
| O | -0.78027700 | 3.58176200  | -0.27565700 |
| H | 1.67673200  | -1.98108400 | -0.54160400 |

**INT-0**

|    |             |             |             |
|----|-------------|-------------|-------------|
| N  | 0.01654200  | 0.73713200  | 0.79908100  |
| C  | 2.21403700  | 0.04810700  | 0.21266500  |
| C  | 1.55462400  | -1.11307800 | 0.02194600  |
| C  | -2.60105800 | -1.28127100 | -0.50124900 |
| C  | -1.56454600 | -1.73930000 | -1.43037100 |
| C  | -0.93030700 | -2.91111900 | -0.86156500 |
| C  | -1.43667500 | -3.05773100 | 0.45665600  |
| C  | -2.49870900 | -2.06138900 | 0.65914300  |
| Rh | -0.45467500 | -1.09113200 | 0.26294300  |
| C  | 1.30571300  | 1.21358800  | 0.52613400  |
| O  | 1.60617600  | 2.39660900  | 0.52680900  |
| C  | -3.30264200 | -1.93269800 | 1.91369000  |
| H  | -4.04654900 | -2.73618300 | 1.98148400  |
| H  | -2.66536500 | -2.00035100 | 2.79987800  |
| H  | -3.83142200 | -0.97863300 | 1.95269700  |
| C  | -3.55751900 | -0.16449800 | -0.77384400 |
| H  | -4.43155000 | -0.53255900 | -1.32529900 |
| H  | -3.91457000 | 0.29008500  | 0.15314700  |
| H  | -3.08325200 | 0.61415700  | -1.37191400 |
| C  | -1.34191200 | -1.17428800 | -2.79571300 |
| H  | -2.14829600 | -1.48512800 | -3.47261100 |
| H  | -1.32038800 | -0.08279000 | -2.75645400 |
| H  | -0.39474100 | -1.51757100 | -3.21557000 |
| C  | 0.09728600  | -3.76598700 | -1.53370300 |
| H  | -0.38087100 | -4.53591600 | -2.15043000 |
| H  | 0.74456800  | -3.17014600 | -2.18121100 |
| H  | 0.73404900  | -4.27047900 | -0.80331000 |
| C  | -1.06812500 | -4.11322600 | 1.45045000  |
| H  | -1.77592800 | -4.95094700 | 1.40626600  |
| H  | -0.06823100 | -4.50784900 | 1.25992000  |
| H  | -1.08542900 | -3.71949300 | 2.46986100  |
| O  | -0.91648500 | 1.79566200  | 0.94213100  |
| C  | -1.30080900 | 2.38531000  | -0.22682100 |
| O  | -1.02615300 | 1.95432800  | -1.32538800 |
| C  | -2.08547900 | 3.66650000  | 0.05260800  |
| C  | -3.05303500 | 3.48276800  | 1.23548700  |
| H  | -2.51925900 | 3.22111900  | 2.15058100  |
| H  | -3.60005100 | 4.41562100  | 1.40590100  |

|   |             |             |             |
|---|-------------|-------------|-------------|
| H | -3.78749600 | 2.69686500  | 1.02866800  |
| C | -1.03353700 | 4.74753200  | 0.39486700  |
| H | -0.35024400 | 4.90331800  | -0.44442000 |
| H | -1.53913500 | 5.69411200  | 0.61280600  |
| H | -0.43677400 | 4.45133500  | 1.25983600  |
| C | -2.85757100 | 4.05908500  | -1.21377900 |
| H | -2.18497100 | 4.15469000  | -2.06828200 |
| H | -3.61522300 | 3.30946700  | -1.46432800 |
| H | -3.36514600 | 5.01561800  | -1.05525500 |
| C | 3.67664800  | 0.22811900  | 0.12283000  |
| C | 4.25206700  | 1.41732500  | -0.35903700 |
| C | 4.53239800  | -0.82450000 | 0.49448100  |
| C | 5.63561100  | 1.53453100  | -0.47965300 |
| H | 3.60582000  | 2.24194400  | -0.62958600 |
| C | 5.91358600  | -0.70513400 | 0.36858000  |
| H | 4.10300900  | -1.73393500 | 0.90393900  |
| C | 6.47274700  | 0.47666000  | -0.12197200 |
| H | 6.06165800  | 2.45914400  | -0.85877000 |
| H | 6.55521300  | -1.52991700 | 0.66579100  |
| H | 7.55035600  | 0.57417300  | -0.21622100 |
| H | 2.08975800  | -2.01336200 | -0.28250300 |

**INT-1**

|    |             |             |             |
|----|-------------|-------------|-------------|
| N  | 0.70835100  | 0.20643100  | 0.77214300  |
| C  | -1.52376900 | 0.63955200  | 1.27668700  |
| C  | -1.65154800 | -0.62931400 | 0.85269200  |
| C  | 0.56535900  | -2.90658900 | 1.66442400  |
| C  | -0.59102400 | -3.48690200 | 1.03021500  |
| C  | -0.24750300 | -3.77220400 | -0.33071100 |
| C  | 1.16074200  | -3.47135900 | -0.51569500 |
| C  | 1.65724700  | -2.94014600 | 0.69943900  |
| Rh | -0.03319500 | -1.56278200 | 0.04315200  |
| C  | -0.13293700 | 1.20265300  | 1.18774800  |
| O  | 0.21275200  | 2.35185600  | 1.46145800  |
| C  | 3.06777900  | -2.52804100 | 0.97853800  |
| H  | 3.64382400  | -3.38524600 | 1.34917000  |
| H  | 3.55983300  | -2.16547200 | 0.07323000  |
| H  | 3.10556600  | -1.74675800 | 1.73810700  |
| C  | 0.68815200  | -2.45324600 | 3.08579600  |
| H  | 1.20523100  | -3.20821100 | 3.69060800  |
| H  | 1.24778200  | -1.51611600 | 3.14232900  |
| H  | -0.29585500 | -2.28203600 | 3.52647600  |
| C  | -1.92053300 | -3.74920300 | 1.66293600  |
| H  | -1.97062300 | -4.78218600 | 2.02698000  |

|   |             |             |             |
|---|-------------|-------------|-------------|
| H | -2.09574900 | -3.08443300 | 2.51094900  |
| H | -2.73288800 | -3.60701700 | 0.94571700  |
| C | -1.15000500 | -4.39645600 | -1.34929000 |
| H | -1.13434000 | -5.48954300 | -1.25852900 |
| H | -2.17714700 | -4.04779700 | -1.23305300 |
| H | -0.83153600 | -4.14191500 | -2.36233900 |
| C | 1.94879600  | -3.70209000 | -1.76699500 |
| H | 2.48689200  | -4.65627600 | -1.71154900 |
| H | 1.29478200  | -3.74234600 | -2.64088800 |
| H | 2.66693700  | -2.89702500 | -1.92883000 |
| O | 2.01054600  | 0.69086000  | 0.46839500  |
| C | 2.79136100  | 0.93705500  | 1.57827300  |
| O | 2.55686600  | 0.47839000  | 2.66965000  |
| C | 3.95442300  | 1.85711600  | 1.21601900  |
| C | 4.75226400  | 1.27494700  | 0.03124900  |
| H | 4.15960000  | 1.24863200  | -0.88466900 |
| H | 5.62598400  | 1.90692900  | -0.15664900 |
| H | 5.11395800  | 0.26355100  | 0.24776500  |
| C | 3.36538700  | 3.22991800  | 0.82230900  |
| H | 2.76193400  | 3.64362200  | 1.63334800  |
| H | 4.18533000  | 3.92145800  | 0.60021400  |
| H | 2.72540300  | 3.14477800  | -0.05570700 |
| C | 4.86111100  | 1.99107000  | 2.44629800  |
| H | 4.30540500  | 2.38406800  | 3.30038000  |
| H | 5.28070200  | 1.02387600  | 2.73805500  |
| H | 5.68687600  | 2.67297500  | 2.22088200  |
| C | -1.08014100 | -0.91834100 | -1.72529000 |
| C | 0.12109200  | -0.60789100 | -1.89814800 |
| C | 1.29475100  | 0.02176800  | -2.55435600 |
| O | 2.52650600  | -0.47920800 | -2.04714000 |
| H | 2.57351000  | -0.15023500 | -1.13121700 |
| H | 1.27292300  | -0.28816400 | -3.60725100 |
| C | 1.24714400  | 1.55014800  | -2.48614800 |
| C | 0.19405400  | 2.25864500  | -1.90711700 |
| C | 2.34416900  | 2.25047500  | -3.00556600 |
| C | 0.24423100  | 3.65140800  | -1.82869800 |
| H | -0.65896500 | 1.73162100  | -1.49999200 |
| C | 2.38700000  | 3.64077000  | -2.93936600 |
| H | 3.16885400  | 1.69600400  | -3.44256200 |
| C | 1.33663600  | 4.34558900  | -2.34455000 |
| H | -0.56593600 | 4.18518500  | -1.34299700 |
| H | 3.24314800  | 4.17411500  | -3.34184800 |
| H | 1.37639200  | 5.42858900  | -2.27752300 |
| C | -2.64526600 | 1.46445900  | 1.77327700  |

|   |             |             |             |
|---|-------------|-------------|-------------|
| C | -2.44543100 | 2.50225900  | 2.69913400  |
| C | -3.95310100 | 1.21852000  | 1.31638700  |
| C | -3.52490400 | 3.25547300  | 3.15886500  |
| H | -1.43942700 | 2.71790400  | 3.03430400  |
| C | -5.02914900 | 1.96964700  | 1.78180300  |
| H | -4.12071300 | 0.43596000  | 0.58302200  |
| C | -4.81927600 | 2.99407700  | 2.70766200  |
| H | -3.35159700 | 4.05287400  | 3.87589300  |
| H | -6.03017200 | 1.76212100  | 1.41403400  |
| H | -5.65567800 | 3.58603700  | 3.06748500  |
| H | -2.59584500 | -1.16704400 | 0.87460900  |
| C | -2.52248700 | -0.87907100 | -1.93309000 |
| O | -3.29115700 | -1.79019600 | -1.68872700 |
| O | -2.88388100 | 0.33278200  | -2.38697400 |
| C | -4.30405000 | 0.59505400  | -2.52444900 |
| C | -4.50776900 | 2.08286400  | -2.32024300 |
| H | -4.84340100 | -0.00568600 | -1.78903100 |
| H | -4.60954800 | 0.26616400  | -3.52331400 |
| H | -5.56333900 | 2.33372000  | -2.46464500 |
| H | -4.21849100 | 2.37236700  | -1.30657000 |
| H | -3.91418900 | 2.65958700  | -3.03476600 |

**TS-1**

|    |             |             |             |
|----|-------------|-------------|-------------|
| N  | 1.09431000  | -0.19415400 | 0.80184800  |
| C  | -0.80243800 | -1.26002000 | 1.63439400  |
| C  | -1.00354300 | -1.60241400 | 0.33189000  |
| C  | 2.16103400  | -2.53822100 | -1.26267700 |
| C  | 0.97546500  | -3.10770200 | -1.80236700 |
| C  | 0.50993400  | -2.24877100 | -2.87271200 |
| C  | 1.47161400  | -1.18778100 | -3.04475900 |
| C  | 2.46324500  | -1.33085000 | -2.02988300 |
| Rh | 0.52066200  | -1.05300700 | -1.00250800 |
| C  | 0.23614000  | -0.20925300 | 1.87040700  |
| O  | 0.30823000  | 0.52912600  | 2.85645000  |
| C  | 3.67251000  | -0.46752600 | -1.84484800 |
| H  | 4.48449000  | -0.80167600 | -2.50295700 |
| H  | 3.45048500  | 0.57436200  | -2.08717800 |
| H  | 4.03300500  | -0.51634500 | -0.81647300 |
| C  | 2.99132000  | -3.05896400 | -0.13219200 |
| H  | 3.91947500  | -3.50414200 | -0.51115900 |
| H  | 3.25017700  | -2.25454400 | 0.56102100  |
| H  | 2.45544700  | -3.82779600 | 0.42826100  |
| C  | 0.28861000  | -4.35755300 | -1.34785000 |
| H  | 0.60227700  | -5.21400000 | -1.95664800 |

|   |             |             |             |
|---|-------------|-------------|-------------|
| H | 0.51898900  | -4.58198200 | -0.30467000 |
| H | -0.79695900 | -4.26781500 | -1.43902800 |
| C | -0.69842500 | -2.50648100 | -3.72065400 |
| H | -0.49696600 | -3.29253400 | -4.45854500 |
| H | -1.54902000 | -2.82443400 | -3.11260800 |
| H | -0.99906700 | -1.60901500 | -4.26538700 |
| C | 1.43361600  | -0.10683900 | -4.08124200 |
| H | 2.07183900  | -0.36939900 | -4.93365000 |
| H | 0.42011500  | 0.04219500  | -4.46117900 |
| H | 1.77859500  | 0.84138900  | -3.66465200 |
| O | 1.89502900  | 0.99300300  | 0.82864200  |
| C | 3.11395200  | 0.84148400  | 1.43602700  |
| O | 3.60725100  | -0.23188700 | 1.68939600  |
| C | 3.71408400  | 2.19778600  | 1.80196700  |
| C | 3.28635600  | 3.31783800  | 0.83878700  |
| H | 2.20891400  | 3.49076900  | 0.86251200  |
| H | 3.78273900  | 4.24797100  | 1.13287300  |
| H | 3.57789100  | 3.10027300  | -0.19383800 |
| C | 3.17856200  | 2.50006200  | 3.22342700  |
| H | 3.54855100  | 1.76052300  | 3.93896600  |
| H | 3.52014900  | 3.49162700  | 3.53818100  |
| H | 2.08682400  | 2.46791700  | 3.24163800  |
| C | 5.24362400  | 2.06573100  | 1.82221800  |
| H | 5.55459300  | 1.24253500  | 2.46799000  |
| H | 5.63649000  | 1.87563800  | 0.81775100  |
| H | 5.69020000  | 2.99412800  | 2.19121900  |
| C | -1.46861600 | -0.14325300 | -0.84637000 |
| C | -0.54462100 | 0.69393800  | -1.18235900 |
| C | -0.19959500 | 2.06943800  | -1.62749400 |
| O | 1.20955200  | 2.27497400  | -1.65747200 |
| H | 1.55827400  | 1.94124000  | -0.81324200 |
| H | -0.53265000 | 2.18876400  | -2.66637600 |
| C | -0.94356600 | 3.08198700  | -0.76847900 |
| C | -0.79191400 | 3.08470300  | 0.62462400  |
| C | -1.80618800 | 4.00156200  | -1.36695600 |
| C | -1.49710500 | 4.00212400  | 1.40057900  |
| H | -0.14327000 | 2.36582300  | 1.11292600  |
| C | -2.51392400 | 4.91953700  | -0.58900900 |
| H | -1.93078400 | 3.99466200  | -2.44668600 |
| C | -2.36071700 | 4.92045900  | 0.79754800  |
| H | -1.37810900 | 3.98876100  | 2.47963000  |
| H | -3.18313500 | 5.62983300  | -1.06578800 |
| H | -2.91214600 | 5.63104100  | 1.40616100  |
| C | -1.56656000 | -1.82989900 | 2.75073400  |

|   |             |             |             |
|---|-------------|-------------|-------------|
| C | -1.02821400 | -1.87122400 | 4.05006700  |
| C | -2.85382100 | -2.35970300 | 2.53709100  |
| C | -1.74626100 | -2.45154500 | 5.09255400  |
| H | -0.05388100 | -1.43500500 | 4.23115400  |
| C | -3.56606800 | -2.93777400 | 3.58324900  |
| H | -3.30315200 | -2.29184700 | 1.55096300  |
| C | -3.01364000 | -2.99123300 | 4.86531400  |
| H | -1.31436600 | -2.48000000 | 6.08868000  |
| H | -4.55965400 | -3.33697100 | 3.40085900  |
| H | -3.57170900 | -3.43940000 | 5.68210500  |
| H | -1.70257500 | -2.37969400 | 0.04926500  |
| C | -2.89862800 | -0.33007800 | -1.12763200 |
| O | -3.49218300 | -1.39152900 | -1.19130600 |
| O | -3.46666500 | 0.87347400  | -1.32431900 |
| C | -4.89459700 | 0.88389400  | -1.54877500 |
| C | -5.30432900 | 2.33703200  | -1.68046100 |
| H | -5.38443500 | 0.38934900  | -0.70433900 |
| H | -5.11631100 | 0.30331200  | -2.44980200 |
| H | -6.38713000 | 2.40730200  | -1.82161900 |
| H | -5.02673200 | 2.89828400  | -0.78462600 |
| H | -4.81094000 | 2.80308700  | -2.53787200 |

**INT-2**

|    |             |             |             |
|----|-------------|-------------|-------------|
| N  | 0.52277500  | 1.11393100  | 0.70697600  |
| C  | 1.29875400  | -0.88966900 | 1.44225400  |
| C  | 0.73951300  | -1.96639300 | 0.75591100  |
| C  | 2.82600600  | 0.81830600  | -1.75158600 |
| C  | 3.15847900  | -0.54873100 | -1.66445300 |
| C  | 2.14646300  | -1.31478100 | -2.38779400 |
| C  | 1.23800100  | -0.38675900 | -2.98862300 |
| C  | 1.59909700  | 0.92816500  | -2.53496100 |
| Rh | 1.06006300  | -0.26962000 | -0.76342200 |
| C  | 0.39839000  | 0.30639400  | 1.79424300  |
| O  | -0.27010800 | 0.41874900  | 2.80871500  |
| C  | 0.96166800  | 2.21818800  | -2.94530700 |
| H  | 1.45573900  | 2.61774600  | -3.84043100 |
| H  | -0.09569500 | 2.07416700  | -3.17127200 |
| H  | 1.05322700  | 2.96467700  | -2.15333800 |
| C  | 3.54214800  | 1.97767900  | -1.13261000 |
| H  | 4.04076100  | 2.57987700  | -1.90180800 |
| H  | 2.84075600  | 2.62248800  | -0.59610500 |
| H  | 4.30185700  | 1.63961200  | -0.42530400 |
| C  | 4.33027900  | -1.15634100 | -0.96273700 |
| H  | 5.09839400  | -1.44805700 | -1.68926200 |

|   |             |             |             |
|---|-------------|-------------|-------------|
| H | 4.77768100  | -0.46563400 | -0.24772700 |
| H | 4.04106100  | -2.05287900 | -0.40912800 |
| C | 2.17626000  | -2.79606400 | -2.60896900 |
| H | 2.76714000  | -3.05034500 | -3.49796900 |
| H | 2.62348300  | -3.31456800 | -1.75710200 |
| H | 1.16922200  | -3.19499900 | -2.75141200 |
| C | 0.13090200  | -0.71775400 | -3.93922900 |
| H | 0.49189500  | -0.65013000 | -4.97311800 |
| H | -0.23481600 | -1.73527100 | -3.78197200 |
| H | -0.70469000 | -0.02882200 | -3.81367500 |
| O | -0.56507800 | 2.04327900  | 0.61317400  |
| C | -0.18769600 | 3.35113000  | 0.50872700  |
| O | 0.95097400  | 3.71574800  | 0.32629500  |
| C | -1.40840600 | 4.25312700  | 0.69815600  |
| C | -2.58839000 | 3.76997200  | -0.16835500 |
| H | -2.93623900 | 2.78051100  | 0.13355800  |
| H | -3.42306800 | 4.46962500  | -0.05915600 |
| H | -2.32079800 | 3.73592700  | -1.22976000 |
| C | -1.79534200 | 4.16418100  | 2.19305800  |
| H | -0.98548100 | 4.53289800  | 2.83026500  |
| H | -2.68205800 | 4.77914300  | 2.37726200  |
| H | -2.01340900 | 3.13225700  | 2.47743500  |
| C | -1.02035200 | 5.68873000  | 0.32472900  |
| H | -0.16439000 | 6.02995500  | 0.91095300  |
| H | -0.75151400 | 5.76231300  | -0.73327700 |
| H | -1.86508100 | 6.35850200  | 0.51245500  |
| C | -0.68427200 | -1.98094400 | 0.30642200  |
| C | -0.85444500 | -0.97059500 | -0.56548200 |
| C | -2.08212600 | -0.41602500 | -1.23357200 |
| O | -1.79686600 | 0.83505500  | -1.87761500 |
| H | -1.44778300 | 1.41225400  | -1.18063100 |
| H | -2.36458700 | -1.09258000 | -2.04900400 |
| C | -3.29704300 | -0.23552100 | -0.32887200 |
| C | -3.19243100 | 0.04433400  | 1.03759200  |
| C | -4.56390800 | -0.25343500 | -0.92272700 |
| C | -4.34060300 | 0.28597500  | 1.79426500  |
| H | -2.22813800 | 0.07241800  | 1.52857300  |
| C | -5.71066700 | -0.01062400 | -0.16819600 |
| H | -4.64874700 | -0.46082300 | -1.98615200 |
| C | -5.60167000 | 0.25697900  | 1.19829100  |
| H | -4.24141700 | 0.49545200  | 2.85519000  |
| H | -6.68664300 | -0.03364700 | -0.64460100 |
| H | -6.49231900 | 0.44258600  | 1.79138000  |
| C | 2.67912200  | -0.89621700 | 1.97578000  |

|   |             |             |             |
|---|-------------|-------------|-------------|
| C | 3.35787800  | 0.32060900  | 2.16127600  |
| C | 3.33320200  | -2.09336500 | 2.30190900  |
| C | 4.66925900  | 0.33296500  | 2.62727000  |
| H | 2.85568500  | 1.24888500  | 1.90873300  |
| C | 4.64643000  | -2.07735700 | 2.77024300  |
| H | 2.80535100  | -3.03719100 | 2.21319800  |
| C | 5.32151400  | -0.86633100 | 2.92738800  |
| H | 5.18347600  | 1.28039400  | 2.75789300  |
| H | 5.13778200  | -3.01192900 | 3.02339200  |
| H | 6.34326000  | -0.85523400 | 3.29431000  |
| H | 1.34835300  | -2.85411400 | 0.59975100  |
| C | -1.58502000 | -3.01946000 | 0.83023700  |
| O | -1.28073800 | -3.76978800 | 1.74165900  |
| O | -2.75970900 | -3.07547200 | 0.16844700  |
| C | -3.73629000 | -3.99182600 | 0.70664800  |
| C | -4.98635000 | -3.87417500 | -0.14169100 |
| H | -3.92408500 | -3.72634700 | 1.75162500  |
| H | -3.31751700 | -5.00295400 | 0.69233600  |
| H | -5.74859300 | -4.56905300 | 0.22448000  |
| H | -5.38720500 | -2.85903000 | -0.10013600 |
| H | -4.77098600 | -4.11946500 | -1.18612500 |

**TS-2**

|    |             |             |             |
|----|-------------|-------------|-------------|
| N  | -0.52845900 | -0.74294100 | 1.20760500  |
| C  | -1.63801200 | 1.35058000  | 1.24913700  |
| C  | -1.18897000 | 2.18269500  | 0.27536800  |
| C  | -1.04155000 | -1.82911800 | -2.56946200 |
| C  | -2.06727900 | -2.29776000 | -1.62910300 |
| C  | -2.96851400 | -1.25059100 | -1.41699000 |
| C  | -2.51997500 | -0.09978300 | -2.22631300 |
| C  | -1.38363100 | -0.49602200 | -2.99953600 |
| Rh | -0.88747900 | -0.48987800 | -0.89594900 |
| C  | -0.65931300 | 0.39916500  | 1.93001800  |
| O  | -0.12897600 | 0.69405900  | 2.99841100  |
| C  | -0.67483300 | 0.30345000  | -4.04738000 |
| H  | -1.04920800 | 0.05222800  | -5.04722300 |
| H  | -0.82551500 | 1.37357400  | -3.88896500 |
| H  | 0.39767000  | 0.10499200  | -4.01009500 |
| C  | 0.01903200  | -2.70197400 | -3.15109700 |
| H  | -0.43655500 | -3.36959100 | -3.89445800 |
| H  | 0.79427000  | -2.11131400 | -3.63704300 |
| H  | 0.48419700  | -3.31778700 | -2.37979800 |
| C  | -2.03625500 | -3.64105300 | -0.97502200 |
| H  | -2.28926500 | -4.42966400 | -1.69352800 |



|   |             |             |             |
|---|-------------|-------------|-------------|
| H | -1.03468600 | -3.84705800 | -0.58841100 |
| H | -2.74183100 | -3.69795400 | -0.14451600 |
| C | -4.15185100 | -1.22780600 | -0.50547000 |
| H | -5.07990300 | -1.31688800 | -1.08346800 |
| H | -4.11748100 | -2.04950500 | 0.21154600  |
| H | -4.20190900 | -0.29586400 | 0.06132000  |
| C | -3.25416200 | 1.19669200  | -2.32998500 |
| H | -4.01990500 | 1.12969400  | -3.11370800 |
| H | -3.75507500 | 1.44216200  | -1.39238000 |
| H | -2.57750800 | 2.01385500  | -2.58662200 |
| O | 0.48529500  | -1.56401600 | 1.81727200  |
| C | 1.21111400  | -2.31545000 | 1.00577200  |
| O | 1.06464100  | -2.36402400 | -0.21488400 |
| C | 2.22326500  | -3.18272500 | 1.75425700  |
| C | 2.43880100  | -2.70938900 | 3.19888500  |
| H | 1.51527300  | -2.75114100 | 3.77989200  |
| H | 3.18272600  | -3.35249900 | 3.68005200  |
| H | 2.80399200  | -1.68059300 | 3.22065100  |
| C | 1.65434200  | -4.61913400 | 1.73931700  |
| H | 1.49695200  | -4.96491800 | 0.71357200  |
| H | 2.35887400  | -5.29868600 | 2.22879600  |
| H | 0.70211900  | -4.67198500 | 2.27740600  |
| C | 3.54944100  | -3.13543800 | 0.97364600  |
| H | 3.40538700  | -3.45635000 | -0.06043000 |
| H | 3.96583800  | -2.12592500 | 0.96602100  |
| H | 4.27456300  | -3.80332300 | 1.44915500  |
| C | 0.16287100  | 2.11167900  | -0.33088600 |
| C | 0.57854400  | 0.93688800  | -0.87003100 |
| C | 1.96721100  | 0.64200400  | -1.39259200 |
| O | 2.00391900  | -0.53437400 | -2.20542900 |
| H | 1.79340300  | -1.27668100 | -1.61188200 |
| H | 2.26556200  | 1.45277900  | -2.06355000 |
| C | 3.04065400  | 0.54258700  | -0.30115400 |
| C | 4.34350600  | 0.23582200  | -0.71776800 |
| C | 2.80097100  | 0.74963000  | 1.05928800  |
| C | 5.38922800  | 0.16269700  | 0.19979900  |
| H | 4.52765600  | 0.05436800  | -1.77186400 |
| C | 3.84721200  | 0.66853200  | 1.98243000  |
| H | 1.80902300  | 0.98561900  | 1.41908800  |
| C | 5.14476900  | 0.38225400  | 1.55861300  |
| H | 6.39426100  | -0.06526300 | -0.14368100 |
| H | 3.63592500  | 0.83551000  | 3.03437900  |
| H | 5.95701900  | 0.32591500  | 2.27729100  |
| C | -3.01821900 | 1.36529400  | 1.77437500  |

|   |             |             |             |
|---|-------------|-------------|-------------|
| C | -3.38232900 | 0.49032400  | 2.81413000  |
| C | -4.02187400 | 2.18891400  | 1.22822100  |
| C | -4.69619300 | 0.42802800  | 3.27326900  |
| H | -2.62443600 | -0.13582700 | 3.27043300  |
| C | -5.33381200 | 2.12679600  | 1.68940000  |
| H | -3.77817300 | 2.88917800  | 0.43710800  |
| C | -5.68168900 | 1.23959200  | 2.71057700  |
| H | -4.94888700 | -0.25746600 | 4.07671800  |
| H | -6.08710400 | 2.77339800  | 1.24886100  |
| H | -6.70612300 | 1.18763900  | 3.06615100  |
| H | -1.82571500 | 2.99317100  | -0.06957600 |
| C | 0.89791400  | 3.39811800  | -0.26510700 |
| O | 0.40842600  | 4.42573400  | 0.17259000  |
| O | 2.16430300  | 3.32268000  | -0.73091300 |
| C | 3.00809600  | 4.47312700  | -0.52539700 |
| C | 4.44441100  | 3.98679000  | -0.57119400 |
| H | 2.75359600  | 4.92729900  | 0.43539900  |
| H | 2.79571000  | 5.20986700  | -1.30829700 |
| H | 5.12774000  | 4.82997300  | -0.42854600 |
| H | 4.62523200  | 3.24838800  | 0.21396900  |
| H | 4.66969200  | 3.51880500  | -1.53374300 |

**INT-3**

|    |             |             |             |
|----|-------------|-------------|-------------|
| N  | -0.74749500 | -0.62504100 | 1.21425600  |
| C  | -1.97240800 | 1.40978000  | 0.94508300  |
| C  | -1.49609700 | 2.08570300  | -0.12279200 |
| C  | -1.41795700 | -2.92715900 | -1.60075100 |
| C  | -2.42853600 | -2.00041300 | -1.28811500 |
| C  | -2.18667100 | -0.78148000 | -2.05545900 |
| C  | -1.04879900 | -1.01683800 | -2.91404200 |
| C  | -0.53164500 | -2.30056000 | -2.58439100 |
| Rh | -0.43189900 | -1.00762100 | -0.79170900 |
| C  | -1.00907200 | 0.59078500  | 1.77582500  |
| O  | -0.57783000 | 1.00817500  | 2.84759200  |
| C  | 0.65743100  | -2.97006800 | -3.19794500 |
| H  | 0.34173100  | -3.64337800 | -4.00444800 |
| H  | 1.35217800  | -2.23634100 | -3.60713200 |
| H  | 1.19319400  | -3.57296700 | -2.45869200 |
| C  | -1.21262000 | -4.29505600 | -1.02746000 |
| H  | -1.45892900 | -5.07388400 | -1.75921200 |
| H  | -0.16973900 | -4.44397900 | -0.73013000 |
| H  | -1.83708500 | -4.45391200 | -0.14585700 |
| C  | -3.53417200 | -2.14669100 | -0.29188800 |
| H  | -4.50118600 | -2.23162300 | -0.80111800 |

|   |             |             |             |
|---|-------------|-------------|-------------|
| H | -3.39919700 | -3.03222600 | 0.33175800  |
| H | -3.57928700 | -1.27547000 | 0.36738600  |
| C | -3.15377400 | 0.34948600  | -2.18968500 |
| H | -3.85025300 | 0.14556100  | -3.01375300 |
| H | -3.73993800 | 0.48465500  | -1.28078900 |
| H | -2.64212200 | 1.28805300  | -2.40787300 |
| C | -0.52906500 | -0.07506600 | -3.95363700 |
| H | -1.04213800 | -0.23770400 | -4.90943000 |
| H | -0.69539300 | 0.96116200  | -3.65140200 |
| H | 0.54314900  | -0.21123900 | -4.10198900 |
| O | 0.27917800  | -1.28552400 | 2.05318500  |
| C | 1.23127100  | -1.88085200 | 1.39423200  |
| O | 1.28843900  | -1.90265100 | 0.14547300  |
| C | 2.22872900  | -2.64105500 | 2.25554400  |
| C | 2.37773400  | -1.98167800 | 3.63641500  |
| H | 1.42453000  | -1.93635700 | 4.16615500  |
| H | 3.08498200  | -2.56387300 | 4.23494200  |
| H | 2.76243800  | -0.96452000 | 3.53815800  |
| C | 1.65765100  | -4.07151500 | 2.40569400  |
| H | 1.53228400  | -4.55042200 | 1.42974000  |
| H | 2.35105500  | -4.67635900 | 2.99759000  |
| H | 0.69065800  | -4.05796400 | 2.91711700  |
| C | 3.58325200  | -2.68142500 | 1.52979300  |
| H | 3.49615500  | -3.16487900 | 0.55402900  |
| H | 3.98123200  | -1.67542700 | 1.38121500  |
| H | 4.29601700  | -3.24981000 | 2.13477400  |
| C | -0.13577500 | 1.96950300  | -0.67195900 |
| C | 0.51823500  | 0.79740200  | -0.90322600 |
| C | 1.98003400  | 0.74138600  | -1.32631500 |
| O | 2.28931200  | -0.41743000 | -2.11281100 |
| H | 2.22643700  | -1.17310700 | -1.51007800 |
| H | 2.19868300  | 1.57583600  | -1.99692200 |
| C | 2.95429400  | 0.83834000  | -0.14616700 |
| C | 2.56204300  | 1.17875100  | 1.15151900  |
| C | 4.31107700  | 0.59328900  | -0.39796100 |
| C | 3.50829800  | 1.27857400  | 2.17415800  |
| H | 1.52340500  | 1.37994000  | 1.37712400  |
| C | 5.25782100  | 0.69992700  | 0.62031600  |
| H | 4.61535400  | 0.31393300  | -1.40139900 |
| C | 4.85894500  | 1.04347700  | 1.91448300  |
| H | 3.17945600  | 1.54757600  | 3.17364400  |
| H | 6.30601700  | 0.51366200  | 0.40400300  |
| H | 5.59336600  | 1.12683900  | 2.71018500  |
| C | -3.35713500 | 1.51778100  | 1.44599500  |

|   |             |            |             |
|---|-------------|------------|-------------|
| C | -3.71859600 | 0.93784800 | 2.67678200  |
| C | -4.36751900 | 2.15586200 | 0.69987900  |
| C | -5.03220900 | 0.99292300 | 3.13762900  |
| H | -2.95592700 | 0.46682300 | 3.28557500  |
| C | -5.67747400 | 2.21466300 | 1.16567200  |
| H | -4.12870500 | 2.60885900 | -0.25578800 |
| C | -6.02041500 | 1.62944100 | 2.38649100  |
| H | -5.28154400 | 0.54009900 | 4.09282800  |
| H | -6.43487400 | 2.71508900 | 0.56927700  |
| H | -7.04403100 | 1.67049700 | 2.74616900  |
| H | -2.10578600 | 2.86099100 | -0.57688600 |
| C | 0.40823000  | 3.31874300 | -1.03616200 |
| O | -0.27177200 | 4.22813300 | -1.47753200 |
| O | 1.73083100  | 3.43857400 | -0.80804300 |
| C | 2.34176300  | 4.70636400 | -1.12167600 |
| C | 3.79522100  | 4.59946300 | -0.70145900 |
| H | 1.80833600  | 5.49649600 | -0.58504000 |
| H | 2.22953600  | 4.90096800 | -2.19337700 |
| H | 4.31660400  | 5.53956100 | -0.90609500 |
| H | 3.87060000  | 4.38070000 | 0.36706600  |
| H | 4.29883800  | 3.79435200 | -1.24362200 |

**TS-3**

|    |             |             |             |
|----|-------------|-------------|-------------|
| N  | 1.21605800  | -0.42299300 | -1.06812700 |
| C  | 2.08123900  | 1.35647200  | -1.02987600 |
| C  | 1.50948600  | 2.17119500  | -0.09660500 |
| C  | 1.32471400  | -2.86789800 | 1.59755300  |
| C  | 2.39289500  | -1.97049200 | 1.39619700  |
| C  | 2.11721800  | -0.75668700 | 2.15560300  |
| C  | 0.90121500  | -0.97035200 | 2.90626600  |
| C  | 0.38011900  | -2.23710200 | 2.51930500  |
| Rh | 0.48275600  | -0.92118900 | 0.71368500  |
| C  | 1.05647800  | 0.51563800  | -1.93508100 |
| O  | 0.59832700  | 0.85025700  | -3.00231600 |
| C  | -0.87108600 | -2.89088600 | 3.00963900  |
| H  | -0.62830500 | -3.69553400 | 3.71422300  |
| H  | -1.52469900 | -2.17306100 | 3.50398700  |
| H  | -1.42332400 | -3.33321700 | 2.17497000  |
| C  | 1.12849800  | -4.22070300 | 0.98929800  |
| H  | 1.30986400  | -5.01362100 | 1.72503600  |
| H  | 0.10410100  | -4.33453400 | 0.62429800  |
| H  | 1.80137800  | -4.38002300 | 0.14504300  |
| C  | 3.57388300  | -2.15041700 | 0.49626200  |
| H  | 4.48056900  | -2.33229800 | 1.08497900  |

|   |             |             |             |
|---|-------------|-------------|-------------|
| H | 3.43183700  | -2.99234600 | -0.18309500 |
| H | 3.73963600  | -1.25875400 | -0.11344700 |
| C | 3.04469000  | 0.40657400  | 2.30769100  |
| H | 3.58809300  | 0.34856100  | 3.25894800  |
| H | 3.77939400  | 0.43077300  | 1.50165100  |
| H | 2.49945200  | 1.35459500  | 2.29384900  |
| C | 0.31258800  | -0.02450700 | 3.90490800  |
| H | 0.67520900  | -0.25870700 | 4.91319300  |
| H | 0.59738900  | 1.00559500  | 3.67791200  |
| H | -0.77647300 | -0.08567900 | 3.89669800  |
| O | -0.29698500 | -1.97231800 | -2.12146500 |
| C | -1.24410100 | -2.13831400 | -1.34796500 |
| O | -1.25194000 | -1.78069300 | -0.09498400 |
| C | -2.51238000 | -2.88202200 | -1.82680900 |
| C | -2.80692200 | -2.47082700 | -3.27814600 |
| H | -1.93685700 | -2.64424300 | -3.91359500 |
| H | -3.65401800 | -3.04836900 | -3.66393800 |
| H | -3.06383100 | -1.40949000 | -3.33220800 |
| C | -2.17499200 | -4.38678300 | -1.76716400 |
| H | -1.96273300 | -4.70183300 | -0.73934500 |
| H | -3.02409800 | -4.97558500 | -2.13038900 |
| H | -1.30382000 | -4.61426000 | -2.38772400 |
| C | -3.72539100 | -2.57871600 | -0.93717500 |
| H | -3.55418900 | -2.89563000 | 0.09482700  |
| H | -3.95791800 | -1.51172600 | -0.93226000 |
| H | -4.60102600 | -3.11670700 | -1.31692700 |
| C | 0.18848700  | 2.05222600  | 0.47989300  |
| C | -0.47208600 | 0.87573700  | 0.75119400  |
| C | -1.93055900 | 0.85212600  | 1.18378700  |
| O | -2.27934400 | -0.31314000 | 1.92601200  |
| H | -2.21207000 | -1.04854800 | 1.28862300  |
| H | -2.10706600 | 1.67966500  | 1.87680900  |
| C | -2.90027600 | 1.01946900  | 0.01060100  |
| C | -2.49951300 | 1.09684300  | -1.32396200 |
| C | -4.26793600 | 1.05393500  | 0.31082000  |
| C | -3.44877000 | 1.21514000  | -2.34168200 |
| H | -1.45178000 | 1.06561500  | -1.59025400 |
| C | -5.21662900 | 1.17769600  | -0.70216600 |
| H | -4.58237400 | 0.96881900  | 1.34661500  |
| C | -4.80895700 | 1.25845800  | -2.03629100 |
| H | -3.11457300 | 1.26957500  | -3.37327400 |
| H | -6.27325600 | 1.20682000  | -0.45182200 |
| H | -5.54574800 | 1.35017300  | -2.82873400 |
| C | 3.48608100  | 1.36163800  | -1.45402700 |

|   |             |            |             |
|---|-------------|------------|-------------|
| C | 3.88231000  | 0.73680900 | -2.65033600 |
| C | 4.47184300  | 1.97426300 | -0.65774900 |
| C | 5.22088100  | 0.72504300 | -3.03190100 |
| H | 3.13644400  | 0.27463600 | -3.28688900 |
| C | 5.80720600  | 1.97252500 | -1.05163200 |
| H | 4.18906400  | 2.44966500 | 0.27511900  |
| C | 6.18888300  | 1.34285400 | -2.23756900 |
| H | 5.50742400  | 0.23750200 | -3.95858600 |
| H | 6.55167500  | 2.45405600 | -0.42483300 |
| H | 7.23161600  | 1.33268500 | -2.53939300 |
| H | 2.04611600  | 3.07743400 | 0.17589700  |
| C | -0.32793600 | 3.41087400 | 0.87529900  |
| O | 0.38607300  | 4.29733400 | 1.30927700  |
| O | -1.64638300 | 3.55523300 | 0.67837300  |
| C | -2.22485100 | 4.83466900 | 1.02291400  |
| C | -3.69217500 | 4.76376700 | 0.64971300  |
| H | -1.69067100 | 5.61650900 | 0.47542600  |
| H | -2.07204100 | 5.01411400 | 2.09186000  |
| H | -4.17912500 | 5.71838800 | 0.87094400  |
| H | -3.80882000 | 4.54734200 | -0.41534300 |
| H | -4.19978900 | 3.97325100 | 1.20819000  |

#### INT-4

|    |             |             |             |
|----|-------------|-------------|-------------|
| N  | 1.11495000  | 0.01592400  | -0.98193000 |
| C  | 1.82107200  | 1.26216000  | -0.88969500 |
| C  | 1.26070300  | 2.26199900  | -0.17416800 |
| C  | 1.62196600  | -2.50777600 | 1.88218200  |
| C  | 2.60076200  | -1.56078800 | 1.54308600  |
| C  | 2.24756100  | -0.29642900 | 2.18803800  |
| C  | 1.09567500  | -0.53701000 | 3.03018500  |
| C  | 0.66146900  | -1.86759500 | 2.78669100  |
| Rh | 0.57046300  | -0.70491800 | 0.88302300  |
| C  | 0.45969300  | -0.18354900 | -2.11507700 |
| O  | 0.39981400  | 0.43157900  | -3.15271300 |
| C  | -0.48098800 | -2.57894900 | 3.44206400  |
| H  | -0.12202500 | -3.19369600 | 4.27698300  |
| H  | -1.21888900 | -1.87273600 | 3.82278200  |
| H  | -0.98399000 | -3.25047900 | 2.73875100  |
| C  | 1.51601400  | -3.92662900 | 1.41658700  |
| H  | 1.80108100  | -4.62617100 | 2.21183700  |
| H  | 0.48843400  | -4.16733400 | 1.12600900  |
| H  | 2.16147400  | -4.11517900 | 0.55610400  |
| C  | 3.78230500  | -1.74962800 | 0.64563600  |
| H  | 4.70290500  | -1.82211400 | 1.23741400  |

|   |             |             |             |
|---|-------------|-------------|-------------|
| H | 3.69331900  | -2.66107800 | 0.05073500  |
| H | 3.89608900  | -0.91161200 | -0.04477300 |
| C | 3.10248300  | 0.93127800  | 2.21185700  |
| H | 3.77610700  | 0.91084300  | 3.07820300  |
| H | 3.71235800  | 1.01054800  | 1.31062000  |
| H | 2.49171400  | 1.83400700  | 2.27780900  |
| C | 0.48365900  | 0.45106400  | 3.97189700  |
| H | 0.97345500  | 0.39742700  | 4.95197000  |
| H | 0.59791200  | 1.46901800  | 3.59274700  |
| H | -0.58254900 | 0.25927100  | 4.09957600  |
| O | -0.28839800 | -1.48226500 | -2.18655700 |
| C | -1.03457500 | -2.04574500 | -1.27182800 |
| O | -1.01148700 | -1.77590800 | -0.05954900 |
| C | -1.93317700 | -3.15719200 | -1.80299400 |
| C | -2.62103800 | -2.70475000 | -3.10377200 |
| H | -1.88715700 | -2.42528700 | -3.86165100 |
| H | -3.23234800 | -3.52589200 | -3.49090900 |
| H | -3.27116300 | -1.84597400 | -2.92129000 |
| C | -1.01104300 | -4.36663600 | -2.08609000 |
| H | -0.49987100 | -4.69766800 | -1.17595500 |
| H | -1.61294100 | -5.20055400 | -2.45957000 |
| H | -0.25864100 | -4.11814100 | -2.83887500 |
| C | -2.98178800 | -3.52173100 | -0.74236100 |
| H | -2.51291000 | -3.87482200 | 0.17982700  |
| H | -3.60856400 | -2.65947500 | -0.50001600 |
| H | -3.62398300 | -4.31915800 | -1.12800500 |
| C | -0.05649900 | 2.15971400  | 0.45625000  |
| C | -0.59463400 | 0.97598500  | 0.86988300  |
| C | -2.04567500 | 0.79082500  | 1.26842100  |
| O | -2.24249200 | -0.30785500 | 2.16573200  |
| H | -2.04217100 | -1.10763000 | 1.65757400  |
| H | -2.38666100 | 1.66090200  | 1.83352500  |
| C | -2.97245600 | 0.63581500  | 0.05118200  |
| C | -2.60951600 | 1.01434500  | -1.24507900 |
| C | -4.24982000 | 0.09870900  | 0.26024700  |
| C | -3.49968900 | 0.85776300  | -2.30860200 |
| H | -1.63162500 | 1.43714300  | -1.43349700 |
| C | -5.14458400 | -0.05094500 | -0.79956200 |
| H | -4.53198400 | -0.20539500 | 1.26239800  |
| C | -4.77285800 | 0.32857100  | -2.09115000 |
| H | -3.18704500 | 1.14538400  | -3.30776700 |
| H | -6.13285100 | -0.46301600 | -0.61559500 |
| H | -5.46660500 | 0.21049400  | -2.91836400 |
| C | 3.15620700  | 1.33629400  | -1.51450100 |

|   |             |             |             |
|---|-------------|-------------|-------------|
| C | 3.58838900  | 0.34542000  | -2.41410000 |
| C | 4.05376400  | 2.37657900  | -1.20295500 |
| C | 4.85673800  | 0.40074200  | -2.98822200 |
| H | 2.92353800  | -0.46947400 | -2.66819800 |
| C | 5.31904600  | 2.43034900  | -1.77840100 |
| H | 3.76472800  | 3.14237300  | -0.49199200 |
| C | 5.73017400  | 1.44234600  | -2.67625900 |
| H | 5.16092300  | -0.37460400 | -3.68535500 |
| H | 5.99044100  | 3.24328300  | -1.51771300 |
| H | 6.71929600  | 1.48304500  | -3.12204100 |
| H | 1.74309300  | 3.22901400  | -0.11520300 |
| C | -0.71038200 | 3.49984200  | 0.59083200  |
| O | -0.09785700 | 4.54989600  | 0.67217600  |
| O | -2.05961600 | 3.44612800  | 0.58760200  |
| C | -2.76689800 | 4.70082400  | 0.63188600  |
| C | -4.22797400 | 4.38080900  | 0.37955800  |
| H | -2.34853300 | 5.36695300  | -0.12797200 |
| H | -2.60428000 | 5.16966700  | 1.60820500  |
| H | -4.82086900 | 5.30053800  | 0.38098800  |
| H | -4.34838900 | 3.88493500  | -0.58743000 |
| H | -4.62055400 | 3.71338500  | 1.15207000  |

**TS-4**

|    |             |             |             |
|----|-------------|-------------|-------------|
| N  | 1.29743300  | 0.07751300  | -0.95992800 |
| C  | 2.00109100  | 1.32723300  | -0.71634800 |
| C  | 1.39341600  | 2.22760200  | 0.08089800  |
| C  | 1.36474400  | -2.71969000 | 1.73478200  |
| C  | 2.41921300  | -1.80628900 | 1.57679800  |
| C  | 2.08666600  | -0.57959800 | 2.30096900  |
| C  | 0.84154000  | -0.80601000 | 2.98803100  |
| C  | 0.35358200  | -2.08955600 | 2.58317700  |
| Rh | 0.49254700  | -0.79797700 | 0.81455300  |
| C  | 1.07551900  | -0.24043700 | -2.15427200 |
| O  | 1.00316300  | -0.26903300 | -3.31781500 |
| C  | -0.88379900 | -2.77895900 | 3.06088400  |
| H  | -0.62768100 | -3.52880900 | 3.81969600  |
| H  | -1.59242300 | -2.07032300 | 3.48682600  |
| H  | -1.37965100 | -3.29836500 | 2.23567800  |
| C  | 1.24260400  | -4.08808900 | 1.14232900  |
| H  | 1.45969600  | -4.86155300 | 1.88952400  |
| H  | 0.22925800  | -4.26286000 | 0.77181500  |
| H  | 1.92800400  | -4.22256000 | 0.30366800  |
| C  | 3.67205100  | -2.02363900 | 0.78999800  |
| H  | 4.43202700  | -2.50727300 | 1.41596000  |



|   |             |             |             |
|---|-------------|-------------|-------------|
| H | 3.49356100  | -2.66628000 | -0.07547300 |
| H | 4.09031000  | -1.08208700 | 0.43236600  |
| C | 2.99771000  | 0.59081500  | 2.50037200  |
| H | 3.64038100  | 0.43758700  | 3.37657200  |
| H | 3.64168900  | 0.74947300  | 1.63368700  |
| H | 2.42797700  | 1.50939400  | 2.65532300  |
| C | 0.17288500  | 0.13145900  | 3.94298600  |
| H | 0.47992700  | -0.08903100 | 4.97261300  |
| H | 0.44061800  | 1.16730700  | 3.72418400  |
| H | -0.91186200 | 0.03942400  | 3.86942700  |
| O | 0.14768600  | -2.28571000 | -1.87152600 |
| C | -0.94436700 | -2.30070400 | -1.26866600 |
| O | -1.15544700 | -1.69569800 | -0.15092600 |
| C | -2.12681900 | -3.08028000 | -1.87009600 |
| C | -2.38804500 | -2.50439200 | -3.27591400 |
| H | -1.48052500 | -2.54551500 | -3.88216500 |
| H | -3.17516500 | -3.08003900 | -3.77466500 |
| H | -2.71748900 | -1.46293200 | -3.21224100 |
| C | -1.69387800 | -4.55496000 | -1.98350000 |
| H | -1.50812300 | -4.98881200 | -0.99403300 |
| H | -2.48366400 | -5.14251100 | -2.46328800 |
| H | -0.77971900 | -4.64292000 | -2.57489500 |
| C | -3.39042500 | -2.95881100 | -1.00985200 |
| H | -3.22847500 | -3.36009100 | -0.00461200 |
| H | -3.70803400 | -1.91830400 | -0.91261600 |
| H | -4.20615400 | -3.52549300 | -1.47205900 |
| C | 0.02742000  | 2.11941800  | 0.59694900  |
| C | -0.59233200 | 0.92956500  | 0.85916800  |
| C | -2.07367400 | 0.80552100  | 1.17289100  |
| O | -2.40027700 | -0.38345400 | 1.89128600  |
| H | -2.23451100 | -1.11071000 | 1.26530100  |
| H | -2.37096600 | 1.61848900  | 1.83920300  |
| C | -2.95123500 | 0.89722100  | -0.08273100 |
| C | -2.45518100 | 1.14076700  | -1.36509300 |
| C | -4.32929300 | 0.70795700  | 0.07937400  |
| C | -3.31602300 | 1.20034900  | -2.46253100 |
| H | -1.39202700 | 1.28879800  | -1.50966500 |
| C | -5.19312000 | 0.77176100  | -1.01292800 |
| H | -4.71605000 | 0.49710000  | 1.07123700  |
| C | -4.68884600 | 1.01851000  | -2.29179400 |
| H | -2.90937200 | 1.38635200  | -3.45248500 |
| H | -6.25963300 | 0.62630900  | -0.86648100 |
| H | -5.35819800 | 1.06506900  | -3.14558600 |
| C | 3.34260200  | 1.47319500  | -1.30904000 |

|   |             |             |             |
|---|-------------|-------------|-------------|
| C | 4.03145400  | 0.36789200  | -1.84044400 |
| C | 3.97612100  | 2.73074000  | -1.35835000 |
| C | 5.30848900  | 0.51016400  | -2.38177800 |
| H | 3.57325700  | -0.61303900 | -1.82273700 |
| C | 5.25169600  | 2.86703100  | -1.89284400 |
| H | 3.45718800  | 3.61042400  | -0.99482300 |
| C | 5.92883700  | 1.75736700  | -2.40710800 |
| H | 5.81630900  | -0.36133100 | -2.78378000 |
| H | 5.71567700  | 3.84835400  | -1.92087500 |
| H | 6.92223700  | 1.86890200  | -2.83006000 |
| H | 1.90439800  | 3.15670400  | 0.29875000  |
| C | -0.57150100 | 3.47945300  | 0.78529500  |
| O | 0.08733800  | 4.49682900  | 0.92483100  |
| O | -1.91823300 | 3.48773100  | 0.75388200  |
| C | -2.57225300 | 4.77057700  | 0.82208800  |
| C | -4.02716000 | 4.53532300  | 0.46333200  |
| H | -2.07646700 | 5.45438000  | 0.12752200  |
| H | -2.45172700 | 5.17901700  | 1.83117000  |
| H | -4.57447200 | 5.48285100  | 0.47905300  |
| H | -4.10938500 | 4.09569300  | -0.53423900 |
| H | -4.49937800 | 3.84922300  | 1.17174600  |

**INT-5**

|    |             |             |             |
|----|-------------|-------------|-------------|
| N  | 1.27060800  | 0.12375100  | -1.06961700 |
| C  | 2.00842200  | 1.35060200  | -0.82062500 |
| C  | 1.39565300  | 2.27921400  | -0.06100900 |
| C  | 1.41238500  | -2.63343200 | 1.73346700  |
| C  | 2.46507200  | -1.74296500 | 1.46964200  |
| C  | 2.19854900  | -0.48163600 | 2.16348500  |
| C  | 0.98857800  | -0.64978900 | 2.91791300  |
| C  | 0.45669600  | -1.94521500 | 2.59868900  |
| Rh | 0.51497000  | -0.73545800 | 0.77886700  |
| C  | 0.81428300  | -0.17690800 | -2.18029500 |
| O  | 0.38037000  | -0.43340700 | -3.22976200 |
| C  | -0.75458700 | -2.58585700 | 3.19478400  |
| H  | -0.46171800 | -3.22566400 | 4.03685200  |
| H  | -1.46490200 | -1.83824400 | 3.54429400  |
| H  | -1.26144500 | -3.21835300 | 2.46128500  |
| C  | 1.25295400  | -4.02878900 | 1.21804300  |
| H  | 1.65781200  | -4.75662300 | 1.93247800  |
| H  | 0.19958100  | -4.26911800 | 1.05895700  |
| H  | 1.75820600  | -4.15708200 | 0.26037800  |
| C  | 3.64962000  | -2.00564500 | 0.59653700  |
| H  | 4.48733800  | -2.38480200 | 1.19492600  |

|   |             |             |             |
|---|-------------|-------------|-------------|
| H | 3.41621800  | -2.74935200 | -0.16832700 |
| H | 3.98727100  | -1.09723100 | 0.09478000  |
| C | 3.14833200  | 0.66981900  | 2.27465400  |
| H | 3.79347600  | 0.55057700  | 3.15434200  |
| H | 3.79132500  | 0.74732300  | 1.39630100  |
| H | 2.61197300  | 1.61584700  | 2.37588400  |
| C | 0.38822700  | 0.33678600  | 3.86834900  |
| H | 0.74786400  | 0.15009100  | 4.88768300  |
| H | 0.65941800  | 1.35842700  | 3.59454400  |
| H | -0.70031200 | 0.26021500  | 3.86142300  |
| O | 0.18728700  | -2.73401800 | -1.53313500 |
| C | -0.93310400 | -2.50410000 | -1.06161200 |
| O | -1.16151500 | -1.62668400 | -0.12681000 |
| C | -2.17794500 | -3.23060700 | -1.60765200 |
| C | -2.42870800 | -2.66580600 | -3.02168700 |
| H | -1.54583500 | -2.79937600 | -3.65174800 |
| H | -3.27502400 | -3.18337900 | -3.48665900 |
| H | -2.66638600 | -1.59871000 | -2.97535400 |
| C | -1.85338700 | -4.73177200 | -1.69444100 |
| H | -1.69344300 | -5.15853800 | -0.69721500 |
| H | -2.68405800 | -5.27257600 | -2.16032600 |
| H | -0.94816000 | -4.89322900 | -2.28286200 |
| C | -3.41561400 | -2.99925100 | -0.73144400 |
| H | -3.24945500 | -3.35076300 | 0.29248800  |
| H | -3.68259100 | -1.94152700 | -0.68821700 |
| H | -4.26814300 | -3.55216300 | -1.14160000 |
| C | 0.03460900  | 2.18195200  | 0.47034200  |
| C | -0.56943900 | 0.99638900  | 0.79616500  |
| C | -2.03915800 | 0.87756900  | 1.16473600  |
| O | -2.32897700 | -0.29354800 | 1.92448500  |
| H | -2.17532400 | -1.03452500 | 1.30873600  |
| H | -2.31539900 | 1.70717000  | 1.81969800  |
| C | -2.96498300 | 0.92841700  | -0.05913900 |
| C | -2.52446900 | 1.15375000  | -1.36442300 |
| C | -4.33082500 | 0.71087400  | 0.15929700  |
| C | -3.42495000 | 1.16016000  | -2.43070300 |
| H | -1.47258500 | 1.32806200  | -1.55194600 |
| C | -5.23559300 | 0.72481300  | -0.90132600 |
| H | -4.67486700 | 0.51378900  | 1.16940500  |
| C | -4.78513500 | 0.94756500  | -2.20428400 |
| H | -3.05884600 | 1.32694800  | -3.43967200 |
| H | -6.29180300 | 0.55654000  | -0.71126500 |
| H | -5.48599500 | 0.95158000  | -3.03369300 |
| C | 3.37221900  | 1.41734000  | -1.36728500 |

|   |             |             |             |
|---|-------------|-------------|-------------|
| C | 3.90045300  | 0.37014400  | -2.14415500 |
| C | 4.19842700  | 2.53169100  | -1.11526400 |
| C | 5.19499800  | 0.43981900  | -2.65852600 |
| H | 3.30822000  | -0.51595500 | -2.33717100 |
| C | 5.48721300  | 2.59623800  | -1.62982100 |
| H | 3.83056200  | 3.35355100  | -0.51217200 |
| C | 5.99595400  | 1.55126300  | -2.40714400 |
| H | 5.57451000  | -0.38409600 | -3.25509700 |
| H | 6.10023100  | 3.46795000  | -1.42172600 |
| H | 7.00381100  | 1.60495500  | -2.80626800 |
| H | 1.89699600  | 3.22292000  | 0.11294700  |
| C | -0.57088000 | 3.54508700  | 0.61159900  |
| O | 0.08263100  | 4.57506300  | 0.65065200  |
| O | -1.91622500 | 3.53971800  | 0.66025900  |
| C | -2.58403700 | 4.81742700  | 0.67218900  |
| C | -4.04680200 | 4.54481600  | 0.37728700  |
| H | -2.11971200 | 5.46256100  | -0.07864600 |
| H | -2.43561200 | 5.28750000  | 1.65028400  |
| H | -4.60600300 | 5.48530000  | 0.35713600  |
| H | -4.15607100 | 4.04701000  | -0.58983800 |
| H | -4.48578300 | 3.89555400  | 1.13971000  |

**TS-5**

|    |             |             |             |
|----|-------------|-------------|-------------|
| N  | -1.32609200 | -0.02540500 | -1.11727700 |
| C  | -2.25281400 | -1.09381500 | -0.80935200 |
| C  | -1.79660800 | -2.05987400 | 0.01171300  |
| C  | -0.87568000 | 2.86348400  | 1.65926900  |
| C  | -2.08681400 | 2.24196000  | 1.33456500  |
| C  | -2.12428800 | 0.93883300  | 2.01095300  |
| C  | -0.94082900 | 0.82559600  | 2.82519100  |
| C  | -0.13308800 | 1.97748100  | 2.56482700  |
| Rh | -0.39562400 | 0.82894000  | 0.71974900  |
| C  | -0.81252600 | 0.09965200  | -2.23810000 |
| O  | -0.37116200 | 0.19563300  | -3.31098400 |
| C  | 1.12656900  | 2.36389400  | 3.26690000  |
| H  | 0.89056400  | 3.07282700  | 4.07142300  |
| H  | 1.62095700  | 1.49487000  | 3.69905200  |
| H  | 1.82139300  | 2.84451200  | 2.57658100  |
| C  | -0.35602700 | 4.17207100  | 1.16123300  |
| H  | -0.47474900 | 4.95051700  | 1.92492900  |
| H  | 0.70742000  | 4.09123600  | 0.92681200  |
| H  | -0.87882300 | 4.49250300  | 0.25888000  |
| C  | -3.15362600 | 2.76434700  | 0.42617200  |
| H  | -3.89192400 | 3.34345100  | 0.99436000  |

|   |             |             |             |
|---|-------------|-------------|-------------|
| H | -2.73335000 | 3.41669700  | -0.34267500 |
| H | -3.68567600 | 1.95250900  | -0.07304900 |
| C | -3.31241900 | 0.03481200  | 2.07806100  |
| H | -3.95634900 | 0.33750400  | 2.91397700  |
| H | -3.90742600 | 0.07344600  | 1.16494600  |
| H | -3.01405800 | -1.00217100 | 2.24004600  |
| C | -0.62702100 | -0.27417100 | 3.78807200  |
| H | -0.98391300 | -0.01332500 | 4.79189600  |
| H | -1.10726700 | -1.20697200 | 3.48647900  |
| H | 0.45002800  | -0.44388200 | 3.82670500  |
| O | 0.54892800  | 1.97689500  | -1.31799700 |
| C | 1.69165100  | 2.14660200  | -0.81095400 |
| O | 1.95845800  | 1.78204600  | 0.37200400  |
| C | 2.76860000  | 2.85873600  | -1.64978300 |
| C | 2.90801000  | 2.10713600  | -2.98654300 |
| H | 1.94862100  | 2.06524800  | -3.50687200 |
| H | 3.63613900  | 2.61658400  | -3.62784500 |
| H | 3.25407000  | 1.08304900  | -2.82391000 |
| C | 2.27716600  | 4.29545300  | -1.91474900 |
| H | 2.16735000  | 4.85673700  | -0.97965700 |
| H | 2.99811000  | 4.83072500  | -2.54219300 |
| H | 1.31054500  | 4.28296300  | -2.42435900 |
| C | 4.11220300  | 2.88277600  | -0.91133900 |
| H | 4.02776700  | 3.40907100  | 0.04343500  |
| H | 4.46052800  | 1.86823600  | -0.70402000 |
| H | 4.86616600  | 3.39228000  | -1.52204200 |
| C | -0.43156800 | -2.14704700 | 0.52777500  |
| C | 0.37458200  | -1.07024200 | 0.78598300  |
| C | 1.83459900  | -1.22966000 | 1.18422400  |
| O | 2.27175700  | -0.24388300 | 2.10690600  |
| H | 2.29591100  | 0.58929500  | 1.59401400  |
| H | 1.96121800  | -2.17649600 | 1.71464500  |
| C | 2.75570500  | -1.27287400 | -0.04572200 |
| C | 2.31045200  | -1.61649300 | -1.32521800 |
| C | 4.11459200  | -0.98875300 | 0.13658600  |
| C | 3.19988300  | -1.67446300 | -2.39924700 |
| H | 1.26576100  | -1.85196400 | -1.48485400 |
| C | 5.00682600  | -1.05133800 | -0.93313400 |
| H | 4.45988200  | -0.70647800 | 1.12484000  |
| C | 4.55292600  | -1.39409100 | -2.20836900 |
| H | 2.82959700  | -1.93227800 | -3.38723000 |
| H | 6.05756100  | -0.82818900 | -0.77077100 |
| H | 5.24506200  | -1.43697100 | -3.04408200 |
| C | -3.61195200 | -0.96598500 | -1.35478500 |

|   |             |             |             |
|---|-------------|-------------|-------------|
| C | -3.98920500 | 0.16585300  | -2.10053900 |
| C | -4.58356400 | -1.96286000 | -1.13304800 |
| C | -5.28355100 | 0.29647300  | -2.60350000 |
| H | -3.27100200 | 0.95687700  | -2.27928000 |
| C | -5.87192400 | -1.82760800 | -1.63517800 |
| H | -4.32841700 | -2.85301000 | -0.56945800 |
| C | -6.23302600 | -0.69659200 | -2.37402200 |
| H | -5.54552500 | 1.18161900  | -3.17524800 |
| H | -6.59985300 | -2.61207600 | -1.45142000 |
| H | -7.24058700 | -0.59557000 | -2.76464900 |
| H | -2.44865800 | -2.88650400 | 0.26629100  |
| C | -0.06370100 | -3.57775400 | 0.78917600  |
| O | -0.85466200 | -4.42168700 | 1.17488700  |
| O | 1.22370700  | -3.85618300 | 0.51236300  |
| C | 1.67090800  | -5.21029400 | 0.72918900  |
| C | 3.11075900  | -5.26575000 | 0.25643600  |
| H | 1.01944200  | -5.88989300 | 0.17177000  |
| H | 1.56980000  | -5.45211100 | 1.79222600  |
| H | 3.51344600  | -6.27414000 | 0.39154700  |
| H | 3.17786200  | -4.99866000 | -0.80160600 |
| H | 3.73067700  | -4.56206200 | 0.81872500  |

**INT-6**

|    |             |             |             |
|----|-------------|-------------|-------------|
| N  | -1.55355100 | -0.14706100 | 0.96904600  |
| C  | -2.37530800 | 0.99084400  | 0.69774800  |
| C  | -1.85982600 | 1.95010600  | -0.09761700 |
| C  | -0.55362900 | -2.98875000 | -1.64351200 |
| C  | -1.83962400 | -2.46813600 | -1.43219700 |
| C  | -1.93920800 | -1.19143400 | -2.15065300 |
| C  | -0.71677400 | -0.99569400 | -2.86557300 |
| C  | 0.17232800  | -2.06933400 | -2.51584100 |
| Rh | -0.33670400 | -0.90835100 | -0.69214000 |
| C  | -1.44622900 | -0.82519000 | 1.99354400  |
| O  | -1.32505900 | -1.55409700 | 2.89795400  |
| C  | 1.47315800  | -2.39192100 | -3.17546300 |
| H  | 1.29196700  | -3.11054500 | -3.98623000 |
| H  | 1.93583300  | -1.49972200 | -3.59353800 |
| H  | 2.17161000  | -2.83389700 | -2.46530800 |
| C  | 0.02980300  | -4.24418400 | -1.07700900 |
| H  | -0.02093300 | -5.05948400 | -1.80914000 |
| H  | 1.07922900  | -4.09018500 | -0.81854400 |
| H  | -0.50160600 | -4.56518600 | -0.17838300 |
| C  | -2.93158100 | -3.07362800 | -0.60722400 |
| H  | -3.54274900 | -3.75256100 | -1.21428800 |

|   |             |             |             |
|---|-------------|-------------|-------------|
| H | -2.53124500 | -3.64875800 | 0.23182000  |
| H | -3.59902900 | -2.30630000 | -0.21065000 |
| C | -3.17735600 | -0.36127700 | -2.27961200 |
| H | -3.79784400 | -0.72962500 | -3.10632000 |
| H | -3.78223100 | -0.38667500 | -1.37112900 |
| H | -2.93036000 | 0.68275200  | -2.47955500 |
| C | -0.41114800 | 0.10998200  | -3.82487600 |
| H | -0.66751600 | -0.19478500 | -4.84687300 |
| H | -0.98132600 | 1.00974700  | -3.58521200 |
| H | 0.65077800  | 0.35712700  | -3.78749800 |
| O | 0.94989700  | -1.36462500 | 0.89582300  |
| C | 2.11745400  | -1.89421200 | 0.74855000  |
| O | 2.70719600  | -2.01584600 | -0.34089600 |
| C | 2.74365200  | -2.44525000 | 2.04472300  |
| C | 2.44534900  | -1.51301000 | 3.22986600  |
| H | 1.37087800  | -1.42300300 | 3.39908700  |
| H | 2.90735800  | -1.91386500 | 4.13922000  |
| H | 2.84922900  | -0.51365900 | 3.05256800  |
| C | 2.09646800  | -3.82454400 | 2.29519000  |
| H | 2.29519300  | -4.51084700 | 1.46498800  |
| H | 2.50696700  | -4.27089800 | 3.20742400  |
| H | 1.01348800  | -3.72845000 | 2.41819000  |
| C | 4.25913100  | -2.59985200 | 1.86062900  |
| H | 4.48647800  | -3.24763000 | 1.01159200  |
| H | 4.72474500  | -1.62819100 | 1.67607300  |
| H | 4.70297900  | -3.03073100 | 2.76487600  |
| C | -0.48645000 | 2.05565500  | -0.58663300 |
| C | 0.37631900  | 1.00461800  | -0.75963600 |
| C | 1.84858600  | 1.18689400  | -1.09526800 |
| O | 2.36160100  | 0.16849800  | -1.93011700 |
| H | 2.44791400  | -0.65680000 | -1.39418100 |
| H | 1.96173900  | 2.10236900  | -1.68085300 |
| C | 2.70727500  | 1.36886300  | 0.16868900  |
| C | 2.21612200  | 1.93438600  | 1.34986300  |
| C | 4.05755600  | 1.00558200  | 0.11156900  |
| C | 3.05798200  | 2.14936600  | 2.44135200  |
| H | 1.17167300  | 2.21060000  | 1.41913300  |
| C | 4.90033600  | 1.21557600  | 1.20349700  |
| H | 4.43798400  | 0.55116000  | -0.79529500 |
| C | 4.40575100  | 1.79323800  | 2.37340500  |
| H | 2.65549000  | 2.58750200  | 3.35039400  |
| H | 5.94574200  | 0.92763400  | 1.13718900  |
| H | 5.06021300  | 1.95684600  | 3.22449900  |
| C | -3.73404300 | 1.00316200  | 1.26848400  |

|   |             |             |             |
|---|-------------|-------------|-------------|
| C | -4.37785700 | -0.18294300 | 1.66278400  |
| C | -4.42878600 | 2.21722900  | 1.43181600  |
| C | -5.67075900 | -0.15969800 | 2.18471300  |
| H | -3.87830300 | -1.13805900 | 1.55272100  |
| C | -5.72052100 | 2.23607700  | 1.94486500  |
| H | -3.94118500 | 3.15151100  | 1.17701900  |
| C | -6.35158800 | 1.04781600  | 2.32412300  |
| H | -6.14435900 | -1.09153500 | 2.47836200  |
| H | -6.23262100 | 3.18592100  | 2.06488400  |
| H | -7.35727000 | 1.06720200  | 2.73176900  |
| H | -2.49544400 | 2.79314400  | -0.33809400 |
| C | -0.18244800 | 3.48807100  | -0.92581900 |
| O | -1.02579200 | 4.28449000  | -1.30421200 |
| O | 1.10523400  | 3.83202000  | -0.74392800 |
| C | 1.47035800  | 5.19775900  | -1.03082200 |
| C | 2.92372200  | 5.34732400  | -0.62484900 |
| H | 0.80783300  | 5.86336800  | -0.46977700 |
| H | 1.31043200  | 5.39259300  | -2.09621000 |
| H | 3.25852200  | 6.37467100  | -0.79739600 |
| H | 3.05191300  | 5.10677700  | 0.43388300  |
| H | 3.56043200  | 4.67122000  | -1.20209400 |

**TS-6**

|    |             |             |             |
|----|-------------|-------------|-------------|
| N  | 1.51179800  | 0.40319600  | -1.72488900 |
| C  | 2.30226200  | 1.26473500  | -0.93901500 |
| C  | 1.77160400  | 2.02059400  | 0.04621600  |
| C  | 1.12919300  | -3.02769300 | 1.30041400  |
| C  | 2.16740800  | -2.07609100 | 1.02947500  |
| C  | 2.12060200  | -1.01990200 | 2.04437400  |
| C  | 0.98856900  | -1.26934400 | 2.86106000  |
| C  | 0.35914600  | -2.50641300 | 2.38197000  |
| Rh | 0.30155500  | -0.98832100 | 0.83691600  |
| C  | 0.57208500  | 0.46285700  | -2.48222000 |
| O  | -0.30317100 | 0.41322200  | -3.26941100 |
| C  | -0.86682700 | -3.12256100 | 2.96676500  |
| H  | -0.57890900 | -3.91127000 | 3.67342500  |
| H  | -1.45944700 | -2.37679800 | 3.49615100  |
| H  | -1.49477300 | -3.55453000 | 2.18615100  |
| C  | 0.81058700  | -4.24792100 | 0.49474900  |
| H  | 1.34326800  | -5.12720800 | 0.87592500  |
| H  | -0.26004400 | -4.46144700 | 0.52214600  |
| H  | 1.09316700  | -4.11006000 | -0.55159400 |
| C  | 3.18905400  | -2.19590800 | -0.05103100 |
| H  | 3.98061000  | -2.88766800 | 0.26402200  |



|   |             |             |             |
|---|-------------|-------------|-------------|
| H | 2.74358000  | -2.58786000 | -0.96783300 |
| H | 3.64921600  | -1.23652100 | -0.28359300 |
| C | 3.14176700  | 0.04977900  | 2.25315000  |
| H | 3.84113200  | -0.25986400 | 3.04017700  |
| H | 3.71669100  | 0.24384900  | 1.34912400  |
| H | 2.67427900  | 0.98565300  | 2.56461700  |
| C | 0.52436100  | -0.46861700 | 4.03386000  |
| H | 0.80928900  | -0.95856300 | 4.97290200  |
| H | 0.96582600  | 0.52968200  | 4.02096300  |
| H | -0.56151600 | -0.36005100 | 4.00740600  |
| O | -0.73957800 | -1.45383400 | -0.91564700 |
| C | -1.84146300 | -2.11754000 | -0.81186700 |
| O | -2.45594200 | -2.28872100 | 0.26301700  |
| C | -2.41331100 | -2.67787400 | -2.12527800 |
| C | -3.27199500 | -1.55496900 | -2.74602600 |
| H | -2.65771400 | -0.68632300 | -2.98829200 |
| H | -3.74425000 | -1.91707600 | -3.66619100 |
| H | -4.05759300 | -1.23554300 | -2.05616100 |
| C | -1.28390200 | -3.06401800 | -3.09296900 |
| H | -0.63231900 | -3.82889800 | -2.65501900 |
| H | -1.70909000 | -3.47420900 | -4.01541400 |
| H | -0.67387000 | -2.19684900 | -3.34824600 |
| C | -3.29182700 | -3.89960500 | -1.81888700 |
| H | -2.70204000 | -4.71112600 | -1.37811600 |
| H | -4.08445400 | -3.64193800 | -1.11460400 |
| H | -3.74434600 | -4.27398900 | -2.74330700 |
| C | 0.37596900  | 2.06695700  | 0.50619200  |
| C | -0.36200400 | 0.95624800  | 0.79105100  |
| C | -1.80573800 | 0.94484200  | 1.26596700  |
| O | -2.08061400 | -0.26649700 | 1.99034300  |
| H | -2.29512000 | -0.99575300 | 1.35088700  |
| H | -1.94074800 | 1.74165500  | 2.00261400  |
| C | -2.84709300 | 1.16300000  | 0.16557300  |
| C | -2.53837300 | 1.70558300  | -1.08309600 |
| C | -4.18259700 | 0.85191100  | 0.45104500  |
| C | -3.53972300 | 1.94834900  | -2.02332900 |
| H | -1.51200900 | 1.94427100  | -1.32485800 |
| C | -5.18671300 | 1.09639200  | -0.48472900 |
| H | -4.42679000 | 0.41592300  | 1.41362900  |
| C | -4.86964900 | 1.65064200  | -1.72664200 |
| H | -3.27365900 | 2.36064100  | -2.99203800 |
| H | -6.21753200 | 0.85335100  | -0.24317400 |
| H | -5.65006600 | 1.83885300  | -2.45802600 |
| C | 3.74336900  | 1.23835000  | -1.27700400 |

|   |             |             |             |
|---|-------------|-------------|-------------|
| C | 4.19347300  | 0.52098400  | -2.39900500 |
| C | 4.70581900  | 1.90057500  | -0.49010900 |
| C | 5.54737700  | 0.47231500  | -2.72599000 |
| H | 3.46978200  | -0.00223500 | -3.01249600 |
| C | 6.05597400  | 1.85482600  | -0.82175200 |
| H | 4.40107500  | 2.45448600  | 0.39026400  |
| C | 6.48737700  | 1.13909300  | -1.94121400 |
| H | 5.86586200  | -0.08890800 | -3.59944100 |
| H | 6.77576600  | 2.37728500  | -0.19879200 |
| H | 7.54221500  | 1.10077600  | -2.19462100 |
| H | 2.42480400  | 2.75460300  | 0.50293000  |
| C | -0.06502200 | 3.48308600  | 0.70399600  |
| O | 0.68658800  | 4.44107500  | 0.62211400  |
| O | -1.38026400 | 3.61491600  | 0.96903900  |
| C | -1.91292700 | 4.95272500  | 1.02252400  |
| C | -3.42288400 | 4.82433700  | 0.94922400  |
| H | -1.50220600 | 5.52747000  | 0.18783400  |
| H | -1.57922500 | 5.43169900  | 1.94936800  |
| H | -3.88511300 | 5.81563100  | 0.98848900  |
| H | -3.72134000 | 4.33056100  | 0.02089500  |
| H | -3.80480000 | 4.23074200  | 1.78460200  |

**INT-7**

|    |             |             |             |
|----|-------------|-------------|-------------|
| N  | -1.63121700 | 0.57674100  | 1.83696500  |
| C  | -2.34320100 | 1.39058700  | 0.94123000  |
| C  | -1.73427800 | 2.06551400  | -0.05552000 |
| C  | -1.20644500 | -3.01858400 | -1.27442800 |
| C  | -2.12094500 | -1.91308100 | -0.97964800 |
| C  | -2.05693200 | -0.98628300 | -2.07170700 |
| C  | -1.00455200 | -1.42009500 | -2.94526100 |
| C  | -0.52974500 | -2.72242300 | -2.46871800 |
| Rh | -0.10024900 | -1.04319100 | -1.02284400 |
| C  | -0.59785500 | 0.60387200  | 2.45825700  |
| O  | 0.35193800  | 0.54186100  | 3.15533100  |
| C  | 0.56385200  | -3.50147900 | -3.12800800 |
| H  | 0.22017600  | -3.92339700 | -4.07971900 |
| H  | 1.42097600  | -2.85460600 | -3.33820900 |
| H  | 0.91093200  | -4.32118600 | -2.49671200 |
| C  | -1.00552600 | -4.18744900 | -0.36399300 |
| H  | -1.90202500 | -4.81778200 | -0.33807300 |
| H  | -0.16397200 | -4.80665800 | -0.68039500 |
| H  | -0.80851700 | -3.84357600 | 0.65545600  |
| C  | -3.07737100 | -1.91450100 | 0.16950500  |
| H  | -3.76595600 | -2.76479000 | 0.09167300  |

|   |             |             |             |
|---|-------------|-------------|-------------|
| H | -2.54210100 | -1.99550300 | 1.11879100  |
| H | -3.66949900 | -1.00153700 | 0.20365700  |
| C | -2.95707100 | 0.17817800  | -2.33323000 |
| H | -3.61408000 | -0.05635500 | -3.18005400 |
| H | -3.58292400 | 0.40746600  | -1.47270400 |
| H | -2.38807500 | 1.07471800  | -2.58831800 |
| C | -0.59676800 | -0.77218200 | -4.23103200 |
| H | -1.14435700 | -1.20243800 | -5.07928600 |
| H | -0.79987000 | 0.30075300  | -4.20779300 |
| H | 0.47129800  | -0.90948400 | -4.41648200 |
| O | 0.55579900  | -1.55284000 | 0.94322600  |
| C | 1.72428600  | -2.04495700 | 1.13498100  |
| O | 2.65288500  | -2.04335900 | 0.28428200  |
| C | 2.02180900  | -2.66648000 | 2.51065900  |
| C | 2.98681800  | -1.70313800 | 3.23520600  |
| H | 2.50836800  | -0.73750800 | 3.41251900  |
| H | 3.27879500  | -2.12874900 | 4.20158700  |
| H | 3.88586700  | -1.53777400 | 2.63676900  |
| C | 0.74966700  | -2.86566600 | 3.34334700  |
| H | 0.03939300  | -3.52446700 | 2.83338600  |
| H | 1.00838200  | -3.32846900 | 4.30198700  |
| H | 0.25286300  | -1.91646500 | 3.54355400  |
| C | 2.71682700  | -4.02173700 | 2.28198700  |
| H | 2.05089000  | -4.72451400 | 1.76802200  |
| H | 3.61510300  | -3.89709400 | 1.67515000  |
| H | 2.99470600  | -4.46449900 | 3.24435200  |
| C | -0.31560800 | 2.03762500  | -0.44491400 |
| C | 0.37758700  | 0.91023700  | -0.75195300 |
| C | 1.81337700  | 0.80411100  | -1.20473800 |
| O | 1.90874200  | -0.61598900 | -1.59584000 |
| H | 2.34932400  | -1.18646100 | -0.83478400 |
| H | 1.96823000  | 1.36862900  | -2.12935500 |
| C | 2.93722300  | 1.12807600  | -0.24129200 |
| C | 2.71765500  | 1.51350800  | 1.08005500  |
| C | 4.25164600  | 1.00056400  | -0.70579100 |
| C | 3.79469000  | 1.76876600  | 1.92894800  |
| H | 1.70766600  | 1.61771700  | 1.44883700  |
| C | 5.32950200  | 1.25251600  | 0.13977700  |
| H | 4.42662300  | 0.69867800  | -1.73477100 |
| C | 5.10330800  | 1.63948500  | 1.46304300  |
| H | 3.60581000  | 2.06270300  | 2.95693800  |
| H | 6.34441200  | 1.15130300  | -0.23315500 |
| H | 5.94144200  | 1.83769000  | 2.12445800  |
| C | -3.79984300 | 1.43971700  | 1.20406300  |

|   |             |            |             |
|---|-------------|------------|-------------|
| C | -4.33023000 | 0.82096900 | 2.34863100  |
| C | -4.69566400 | 2.07564200 | 0.32399500  |
| C | -5.69919800 | 0.84057200 | 2.60722100  |
| H | -3.65594000 | 0.32042800 | 3.03335100  |
| C | -6.06180100 | 2.09873000 | 0.58688400  |
| H | -4.32819200 | 2.55556900 | -0.57570800 |
| C | -6.57395900 | 1.47965200 | 1.72923400  |
| H | -6.08133200 | 0.35405800 | 3.49972800  |
| H | -6.73008800 | 2.59858100 | -0.10790000 |
| H | -7.64090000 | 1.49399700 | 1.92898300  |
| H | -2.33980700 | 2.78804500 | -0.59052800 |
| C | 0.22770200  | 3.42013100 | -0.58086600 |
| O | -0.41232200 | 4.42231800 | -0.30967700 |
| O | 1.49461200  | 3.46902500 | -1.04878900 |
| C | 2.12217300  | 4.76810700 | -1.06878300 |
| C | 3.61977200  | 4.55218400 | -1.16867400 |
| H | 1.84229400  | 5.30652100 | -0.15973300 |
| H | 1.72812500  | 5.33330600 | -1.92052300 |
| H | 4.12864400  | 5.52059700 | -1.20829500 |
| H | 3.99041000  | 3.99524200 | -0.30504700 |
| H | 3.87801700  | 3.99146200 | -2.07150400 |

**TS-7**

|    |             |             |             |
|----|-------------|-------------|-------------|
| N  | 1.36429300  | 0.37778200  | -1.97784700 |
| C  | 2.02525700  | 1.39046300  | -1.32194100 |
| C  | 1.41379200  | 2.24564100  | -0.44146900 |
| C  | 1.34711600  | -2.05693400 | 2.50129600  |
| C  | 2.14958200  | -0.98660600 | 1.92265300  |
| C  | 1.65986600  | 0.26001700  | 2.45012900  |
| C  | 0.46419600  | -0.01105200 | 3.18504400  |
| C  | 0.29854000  | -1.46164900 | 3.24985300  |
| Rh | 0.12162300  | -0.76651500 | 1.16899700  |
| C  | 0.14996900  | 0.03108600  | -1.83645100 |
| O  | -0.73484600 | -0.62129000 | -2.29790400 |
| C  | -0.83185900 | -2.14782700 | 3.94798000  |
| H  | -0.73379400 | -2.04634500 | 5.03505100  |
| H  | -1.78642600 | -1.70437000 | 3.65020800  |
| H  | -0.86717300 | -3.21099400 | 3.70484300  |
| C  | 1.57085800  | -3.50906000 | 2.23208300  |
| H  | 2.53415000  | -3.82930200 | 2.64465400  |
| H  | 0.78666400  | -4.12632000 | 2.67358200  |
| H  | 1.57993900  | -3.69236700 | 1.15376900  |
| C  | 3.36002300  | -1.18649700 | 1.06651600  |
| H  | 4.23878900  | -1.43198800 | 1.67622800  |

|   |             |             |             |
|---|-------------|-------------|-------------|
| H | 3.19435000  | -2.00439900 | 0.36164800  |
| H | 3.58724900  | -0.29210000 | 0.48420500  |
| C | 2.34170700  | 1.58364600  | 2.36468700  |
| H | 2.90581000  | 1.73053500  | 3.29555500  |
| H | 3.04686000  | 1.62014300  | 1.53573900  |
| H | 1.64289700  | 2.41536300  | 2.26240000  |
| C | -0.38991300 | 0.99832700  | 3.88628800  |
| H | -0.08886400 | 1.10833700  | 4.93564400  |
| H | -0.30791000 | 1.97659900  | 3.40747800  |
| H | -1.44014700 | 0.69651200  | 3.86958900  |
| O | 0.17933800  | -2.28379700 | -0.28205400 |
| C | -0.85744500 | -2.87825600 | -0.74635000 |
| O | -2.03883100 | -2.65961900 | -0.37659700 |
| C | -0.60451700 | -3.96918000 | -1.79796000 |
| C | -1.66345800 | -3.83269300 | -2.90609600 |
| H | -1.56976500 | -2.86542100 | -3.40587800 |
| H | -1.52942300 | -4.62667200 | -3.64894500 |
| H | -2.66963700 | -3.90298100 | -2.48899800 |
| C | 0.80326000  | -3.84553400 | -2.39598400 |
| H | 1.57505900  | -3.96112700 | -1.63080000 |
| H | 0.95139000  | -4.62040900 | -3.15606300 |
| H | 0.93970400  | -2.86762500 | -2.86455500 |
| C | -0.76463800 | -5.32677600 | -1.08198400 |
| H | -0.02549900 | -5.44027100 | -0.28067700 |
| H | -1.76344800 | -5.41911200 | -0.64679500 |
| H | -0.61820600 | -6.14607000 | -1.79387300 |
| C | 0.04765700  | 2.10323500  | -0.04267600 |
| C | -0.58371600 | 0.87981000  | -0.03504600 |
| C | -2.03109200 | 0.65425000  | 0.34506700  |
| O | -2.01567800 | -0.63799500 | 1.02906900  |
| H | -2.13877000 | -1.46078800 | 0.37684700  |
| H | -2.31680200 | 1.36445400  | 1.13126000  |
| C | -3.10102500 | 0.70977000  | -0.72990600 |
| C | -2.94067300 | 1.47629200  | -1.88641200 |
| C | -4.30987100 | 0.03727200  | -0.52160100 |
| C | -3.97027300 | 1.56826400  | -2.82099100 |
| H | -2.00961200 | 2.00249900  | -2.05457600 |
| C | -5.33894000 | 0.12458200  | -1.45888000 |
| H | -4.44025300 | -0.56468800 | 0.37175300  |
| C | -5.17340400 | 0.89254000  | -2.61165800 |
| H | -3.82730400 | 2.16164600  | -3.71940600 |
| H | -6.26891200 | -0.40966200 | -1.28762900 |
| H | -5.97335700 | 0.96060100  | -3.34301200 |
| C | 3.44598900  | 1.54104600  | -1.71076500 |

|   |             |             |             |
|---|-------------|-------------|-------------|
| C | 3.99716100  | 0.67686700  | -2.67296600 |
| C | 4.29085300  | 2.49504100  | -1.11301100 |
| C | 5.33818800  | 0.77358500  | -3.03541800 |
| H | 3.35247400  | -0.06864900 | -3.12250800 |
| C | 5.63139000  | 2.58690900  | -1.47406600 |
| H | 3.90532000  | 3.17150400  | -0.35848900 |
| C | 6.16327100  | 1.72773900  | -2.43878900 |
| H | 5.74125500  | 0.09676100  | -3.78302100 |
| H | 6.26381200  | 3.33133900  | -0.99949700 |
| H | 7.21054500  | 1.79904600  | -2.71650900 |
| H | 1.92901900  | 3.13895000  | -0.11851900 |
| C | -0.59256900 | 3.33354400  | 0.51525500  |
| O | -0.02310700 | 4.08659400  | 1.28980600  |
| O | -1.86894400 | 3.48247800  | 0.13378800  |
| C | -2.62563200 | 4.56211900  | 0.72678000  |
| C | -4.05915000 | 4.38999000  | 0.26405900  |
| H | -2.19145400 | 5.51268300  | 0.40183900  |
| H | -2.52556700 | 4.50568100  | 1.81498100  |
| H | -4.68355900 | 5.18858300  | 0.67578500  |
| H | -4.12034800 | 4.42223800  | -0.82661400 |
| H | -4.45857800 | 3.42612600  | 0.59089200  |

**INT-8**

|    |             |             |             |
|----|-------------|-------------|-------------|
| N  | -1.24339900 | -0.20501400 | -1.92273100 |
| C  | -1.79092200 | -1.35045900 | -1.60913200 |
| C  | -1.06957000 | -2.37843800 | -0.90189200 |
| C  | -1.32313800 | 1.57875700  | 2.83509600  |
| C  | -2.13925900 | 0.61477800  | 2.10983800  |
| C  | -1.62830500 | -0.69654200 | 2.39303300  |
| C  | -0.42488400 | -0.55130000 | 3.16699700  |
| C  | -0.26456600 | 0.86339800  | 3.46508100  |
| Rh | -0.13873200 | 0.55606000  | 1.29418000  |
| C  | 0.09929200  | 0.04146400  | -1.59425000 |
| O  | 0.73661400  | 0.88191300  | -2.22070100 |
| C  | 0.86025300  | 1.43671900  | 4.26541000  |
| H  | 0.71212800  | 1.23578800  | 5.33311000  |
| H  | 1.81238600  | 0.99041500  | 3.96663100  |
| H  | 0.93960600  | 2.51631500  | 4.12826800  |
| C  | -1.55952400 | 3.05358000  | 2.83610200  |
| H  | -2.44214500 | 3.29788400  | 3.43880600  |
| H  | -0.70592400 | 3.59792500  | 3.24374200  |
| H  | -1.73117700 | 3.40792600  | 1.81664000  |
| C  | -3.33995000 | 0.95533300  | 1.28496600  |
| H  | -4.20934300 | 1.16099000  | 1.92145900  |

|   |             |             |             |
|---|-------------|-------------|-------------|
| H | -3.13861300 | 1.84019500  | 0.67661100  |
| H | -3.59722800 | 0.14203300  | 0.60418600  |
| C | -2.28095100 | -1.97694600 | 2.00290300  |
| H | -3.02588600 | -2.23373100 | 2.76730400  |
| H | -2.80642300 | -1.88196100 | 1.05176900  |
| H | -1.56862100 | -2.79811400 | 1.92320300  |
| C | 0.41300800  | -1.64945900 | 3.74364200  |
| H | 0.10165100  | -1.87031000 | 4.77268500  |
| H | 0.32802200  | -2.56655100 | 3.15979400  |
| H | 1.46648900  | -1.35810500 | 3.77464600  |
| O | -0.47841200 | 2.17652500  | 0.00046200  |
| C | 0.42525600  | 2.97287100  | -0.43796200 |
| O | 1.63266400  | 2.94549600  | -0.08039900 |
| C | -0.03341500 | 4.05108100  | -1.42760900 |
| C | 1.01880500  | 4.15971500  | -2.54576100 |
| H | 1.09571700  | 3.21134700  | -3.08166000 |
| H | 0.72795200  | 4.94704600  | -3.24987300 |
| H | 2.00010700  | 4.39943600  | -2.13147600 |
| C | -1.40078600 | 3.69439100  | -2.02655300 |
| H | -2.17650800 | 3.65839300  | -1.25665900 |
| H | -1.68611000 | 4.44930500  | -2.76765500 |
| H | -1.35996500 | 2.71557600  | -2.50984700 |
| C | -0.11284600 | 5.37844300  | -0.64528600 |
| H | -0.85618200 | 5.32066200  | 0.15841400  |
| H | 0.85606400  | 5.62789700  | -0.20372600 |
| H | -0.40721800 | 6.19134700  | -1.31750300 |
| C | 0.12545600  | -2.05296800 | -0.32211000 |
| C | 0.65472000  | -0.70796600 | -0.43634300 |
| C | 2.07264200  | -0.38569000 | 0.05628400  |
| O | 1.95584900  | 0.74718400  | 0.95327600  |
| H | 1.92220000  | 1.69316200  | 0.46074100  |
| H | 2.37994800  | -1.19793200 | 0.71698700  |
| C | 3.15916400  | -0.21359900 | -0.98388300 |
| C | 3.22801900  | -1.09488900 | -2.06882000 |
| C | 4.15340700  | 0.75496900  | -0.83075800 |
| C | 4.26921000  | -1.00329200 | -2.98842200 |
| H | 2.45930600  | -1.84849600 | -2.19667900 |
| C | 5.19333000  | 0.85090300  | -1.75700500 |
| H | 4.11106300  | 1.44473400  | 0.00409400  |
| C | 5.25713500  | -0.02757900 | -2.83714300 |
| H | 4.30343300  | -1.68749300 | -3.83144200 |
| H | 5.95255100  | 1.61749500  | -1.63192200 |
| H | 6.06528400  | 0.04886800  | -3.55858800 |
| C | -3.22068300 | -1.54375600 | -1.97189500 |

|   |             |             |             |
|---|-------------|-------------|-------------|
| C | -3.85298500 | -0.59380500 | -2.79169400 |
| C | -3.97490200 | -2.62392200 | -1.48670100 |
| C | -5.19869200 | -0.72395500 | -3.11698000 |
| H | -3.26047700 | 0.23715100  | -3.15599900 |
| C | -5.32475400 | -2.75187500 | -1.81276100 |
| H | -3.51812000 | -3.36508600 | -0.84034000 |
| C | -5.94078400 | -1.80379200 | -2.62940000 |
| H | -5.67232100 | 0.01696400  | -3.75417300 |
| H | -5.89407600 | -3.59172100 | -1.42597100 |
| H | -6.99159800 | -1.90412300 | -2.88432600 |
| H | -1.46058900 | -3.38198700 | -0.80720500 |
| C | 0.83536100  | -3.16972900 | 0.38020400  |
| O | 0.32232600  | -3.91333700 | 1.19936600  |
| O | 2.10123500  | -3.29836400 | -0.04135300 |
| C | 2.90959400  | -4.33045700 | 0.57264300  |
| C | 4.32154100  | -4.13938200 | 0.05655200  |
| H | 2.49119800  | -5.30516300 | 0.30407000  |
| H | 2.84188600  | -4.22585100 | 1.65955800  |
| H | 4.98132400  | -4.89804200 | 0.48788300  |
| H | 4.35219500  | -4.22700700 | -1.03241900 |
| H | 4.70089800  | -3.14972300 | 0.32429900  |

**INT-9**

|    |             |             |             |
|----|-------------|-------------|-------------|
| N  | -1.01125500 | -0.38873400 | -1.72654700 |
| C  | -1.18357100 | -1.69685300 | -1.62363700 |
| C  | -0.13626400 | -2.53236000 | -1.15336200 |
| C  | -1.59141900 | 0.85905300  | 2.80932200  |
| C  | -2.11840100 | -0.28517800 | 2.08535000  |
| C  | -1.20009200 | -1.36050500 | 2.26573600  |
| C  | -0.06900100 | -0.88063400 | 3.03747200  |
| C  | -0.34743600 | 0.48807300  | 3.41433200  |
| Rh | -0.13331100 | 0.32068300  | 1.25923400  |
| C  | 0.27520400  | 0.18439400  | -1.53447200 |
| O  | 0.54905100  | 1.22800000  | -2.11185500 |
| C  | 0.57200900  | 1.35770200  | 4.21013800  |
| H  | 0.72274600  | 0.94705300  | 5.21462500  |
| H  | 1.54479500  | 1.41988900  | 3.71017400  |
| H  | 0.17602600  | 2.36987400  | 4.31109500  |
| C  | -2.24711400 | 2.19834900  | 2.91213800  |
| H  | -2.79806500 | 2.27637300  | 3.85722600  |
| H  | -1.50920500 | 3.00217700  | 2.87780800  |
| H  | -2.95622400 | 2.35462500  | 2.09772900  |
| C  | -3.42264200 | -0.33872700 | 1.35038800  |
| H  | -4.25682100 | -0.52695800 | 2.03792100  |



|   |             |             |             |
|---|-------------|-------------|-------------|
| H | -3.62046700 | 0.59727600  | 0.82363000  |
| H | -3.41782400 | -1.13308800 | 0.60176100  |
| C | -1.39711500 | -2.76630700 | 1.81342300  |
| H | -1.86311900 | -3.33418000 | 2.62943700  |
| H | -2.06356800 | -2.81756700 | 0.95293800  |
| H | -0.45437000 | -3.25180600 | 1.55803600  |
| C | 1.09319700  | -1.68560700 | 3.52565500  |
| H | 0.90302600  | -2.05168300 | 4.54291300  |
| H | 1.28250100  | -2.54631300 | 2.88354400  |
| H | 1.99636200  | -1.07072700 | 3.55298300  |
| O | -0.65598800 | 2.19174500  | 0.21779200  |
| C | -1.51957300 | 2.56087600  | -0.59097200 |
| O | -2.33753700 | 1.76652200  | -1.24041900 |
| C | -1.68770500 | 4.04236300  | -0.91026800 |
| C | -3.16152200 | 4.44091900  | -0.70395000 |
| H | -3.46098700 | 4.32373400  | 0.34384900  |
| H | -3.29893100 | 5.49241400  | -0.97508900 |
| H | -3.82394700 | 3.83233400  | -1.32307000 |
| C | -0.77022000 | 4.88279300  | -0.01470600 |
| H | 0.27491000  | 4.59594600  | -0.14835200 |
| H | -0.88160000 | 5.94215700  | -0.26664900 |
| H | -1.01918200 | 4.75394200  | 1.04276800  |
| C | -1.28980200 | 4.21983900  | -2.39322700 |
| H | -0.27303400 | 3.85817800  | -2.56684200 |
| H | -1.96380300 | 3.65971000  | -3.04505600 |
| H | -1.34112400 | 5.28046100  | -2.65997100 |
| C | 0.96615800  | -1.93140600 | -0.57195800 |
| C | 1.11288300  | -0.51046300 | -0.54662500 |
| C | 2.30053800  | 0.20657600  | 0.12285300  |
| O | 1.75045700  | 1.01597400  | 1.13422100  |
| H | -1.92559200 | 0.82260800  | -1.40735500 |
| H | 2.91948400  | -0.57784000 | 0.58641700  |
| C | 3.19884100  | 0.98511200  | -0.82420100 |
| C | 3.93025800  | 0.31896300  | -1.81348400 |
| C | 3.32932500  | 2.36779400  | -0.68958100 |
| C | 4.77905400  | 1.02986100  | -2.66079500 |
| H | 3.82194700  | -0.75508700 | -1.92538300 |
| C | 4.18242300  | 3.07816100  | -1.53441600 |
| H | 2.74481600  | 2.86508400  | 0.07577400  |
| C | 4.91027900  | 2.41343300  | -2.52247000 |
| H | 5.33740500  | 0.50450800  | -3.43112600 |
| H | 4.27607200  | 4.15541300  | -1.42453400 |
| H | 5.57255000  | 2.96781400  | -3.18148100 |
| C | -2.52824500 | -2.23398600 | -1.94905500 |

|   |             |             |             |
|---|-------------|-------------|-------------|
| C | -3.44026800 | -1.43955100 | -2.66449400 |
| C | -2.93343500 | -3.51380800 | -1.53498000 |
| C | -4.72126200 | -1.90610600 | -2.94323300 |
| H | -3.12396100 | -0.46108200 | -3.00611800 |
| C | -4.21561400 | -3.98054900 | -1.81807700 |
| H | -2.25262500 | -4.14451800 | -0.97446700 |
| C | -5.11535700 | -3.17788600 | -2.52046700 |
| H | -5.41195300 | -1.27906600 | -3.49883600 |
| H | -4.51257200 | -4.97041900 | -1.48510500 |
| H | -6.11459400 | -3.54155700 | -2.73995200 |
| H | -0.22040100 | -3.60996800 | -1.17471100 |
| C | 1.98179900  | -2.85261800 | 0.03279200  |
| O | 1.72587300  | -3.69932000 | 0.87214100  |
| O | 3.20231800  | -2.67373400 | -0.48844800 |
| C | 4.27780500  | -3.46033900 | 0.08129700  |
| C | 5.55374600  | -3.03404500 | -0.61547000 |
| H | 4.05116900  | -4.52046400 | -0.06429500 |
| H | 4.30901900  | -3.26894300 | 1.15820800  |
| H | 6.40519300  | -3.57688800 | -0.19429600 |
| H | 5.50263800  | -3.24904900 | -1.68644200 |
| H | 5.72293400  | -1.96148800 | -0.48882100 |

**TS-8**

|    |             |             |             |
|----|-------------|-------------|-------------|
| N  | -0.96301400 | -0.36746600 | -1.71162900 |
| C  | -1.11309200 | -1.68709600 | -1.64164900 |
| C  | -0.03891900 | -2.49459300 | -1.20927800 |
| C  | -1.60557500 | 0.75527300  | 2.81140100  |
| C  | -2.09230800 | -0.40622900 | 2.09234400  |
| C  | -1.11841500 | -1.43833100 | 2.24855900  |
| C  | -0.00171300 | -0.91717500 | 3.01091500  |
| C  | -0.33277400 | 0.43608100  | 3.39605300  |
| Rh | -0.15471100 | 0.31090500  | 1.24546100  |
| C  | 0.31309500  | 0.24295900  | -1.54212100 |
| O  | 0.53995200  | 1.30308100  | -2.10396000 |
| C  | 0.55880700  | 1.34247100  | 4.18175300  |
| H  | 0.74318800  | 0.93401700  | 5.18148900  |
| H  | 1.51927900  | 1.44884300  | 3.66540800  |
| H  | 0.12008500  | 2.33563000  | 4.29334800  |
| C  | -2.32073700 | 2.06151200  | 2.93184600  |
| H  | -2.87162700 | 2.10267800  | 3.87932800  |
| H  | -1.62103400 | 2.89873300  | 2.90297900  |
| H  | -3.03673100 | 2.19276700  | 2.11935100  |
| C  | -3.40782700 | -0.51180800 | 1.38289100  |
| H  | -4.22847200 | -0.65857100 | 2.09620600  |

|   |             |             |             |
|---|-------------|-------------|-------------|
| H | -3.61612800 | 0.38716500  | 0.79875900  |
| H | -3.41311600 | -1.35302600 | 0.68745400  |
| C | -1.25194000 | -2.84553900 | 1.77721700  |
| H | -1.68593800 | -3.44567300 | 2.58776100  |
| H | -1.92003300 | -2.91687300 | 0.91948700  |
| H | -0.28925500 | -3.28315800 | 1.51017500  |
| C | 1.20790600  | -1.66941200 | 3.46637300  |
| H | 1.05717300  | -2.06027900 | 4.48088500  |
| H | 1.42705800  | -2.51014800 | 2.80734000  |
| H | 2.07937600  | -1.00997000 | 3.48581800  |
| O | -0.76970500 | 2.13888300  | 0.23958900  |
| C | -1.67783700 | 2.42285800  | -0.57257400 |
| O | -2.41337400 | 1.56764700  | -1.20867000 |
| C | -1.95835600 | 3.89520600  | -0.87852600 |
| C | -3.45391700 | 4.17605800  | -0.63753700 |
| H | -3.71843900 | 4.03919000  | 0.41756800  |
| H | -3.68488400 | 5.21177600  | -0.90674800 |
| H | -4.07790400 | 3.51105700  | -1.23845600 |
| C | -1.09135400 | 4.80534300  | -0.00125500 |
| H | -0.02999300 | 4.59947200  | -0.15499400 |
| H | -1.28815500 | 5.85337600  | -0.24987000 |
| H | -1.30887500 | 4.65924400  | 1.06087800  |
| C | -1.61244800 | 4.10904400  | -2.36834800 |
| H | -0.56906200 | 3.84783500  | -2.56348200 |
| H | -2.24265900 | 3.48313300  | -3.00404100 |
| H | -1.77206200 | 5.15880700  | -2.63644500 |
| C | 1.06162100  | -1.87214600 | -0.63048500 |
| C | 1.18146000  | -0.45664400 | -0.59054100 |
| C | 2.31737400  | 0.29585900  | 0.12244000  |
| O | 1.71079700  | 1.07477700  | 1.12437700  |
| H | -1.84313600 | 0.59621300  | -1.46729000 |
| H | 2.95416500  | -0.47033200 | 0.59328200  |
| C | 3.20841000  | 1.11709500  | -0.79638200 |
| C | 3.97643300  | 0.48978500  | -1.78344900 |
| C | 3.29281500  | 2.50072900  | -0.63831800 |
| C | 4.81773300  | 1.23977400  | -2.60411600 |
| H | 3.90239700  | -0.58479700 | -1.91527100 |
| C | 4.13850700  | 3.25020700  | -1.45661100 |
| H | 2.67797400  | 2.96775800  | 0.12217600  |
| C | 4.90397900  | 2.62419600  | -2.44142000 |
| H | 5.40474300  | 0.74430300  | -3.37293200 |
| H | 4.19592500  | 4.32797400  | -1.32896200 |
| H | 5.55992200  | 3.20931900  | -3.07984300 |
| C | -2.45190300 | -2.23945400 | -1.95271200 |

|   |             |             |             |
|---|-------------|-------------|-------------|
| C | -3.40160500 | -1.44488700 | -2.61768200 |
| C | -2.81681600 | -3.54075700 | -1.56743900 |
| C | -4.67983100 | -1.93276800 | -2.87273200 |
| H | -3.12585500 | -0.44806800 | -2.94020800 |
| C | -4.09507100 | -4.02857000 | -1.82905400 |
| H | -2.10612200 | -4.17206600 | -1.04623900 |
| C | -5.03311900 | -3.22529000 | -2.47922600 |
| H | -5.40021800 | -1.30411400 | -3.38701000 |
| H | -4.35954500 | -5.03496200 | -1.51923200 |
| H | -6.03031200 | -3.60456700 | -2.68052500 |
| H | -0.09517100 | -3.57338100 | -1.24128200 |
| C | 2.09918200  | -2.77867400 | -0.03963900 |
| O | 1.85746200  | -3.66459800 | 0.76269600  |
| O | 3.32190100  | -2.53604700 | -0.52715600 |
| C | 4.41460100  | -3.30410700 | 0.03581300  |
| C | 5.68748500  | -2.80495800 | -0.61671200 |
| H | 4.23051200  | -4.36538100 | -0.15448000 |
| H | 4.41657300  | -3.15310900 | 1.11953300  |
| H | 6.54993800  | -3.33057000 | -0.19612700 |
| H | 5.66738200  | -2.98259200 | -1.69552100 |
| H | 5.81277200  | -1.73212600 | -0.44842600 |

**INT-10**

|    |             |             |             |
|----|-------------|-------------|-------------|
| N  | -1.04292100 | -0.34183200 | -1.86181400 |
| C  | -1.68023200 | -1.51783000 | -1.61549300 |
| C  | -0.93959500 | -2.54633400 | -1.07444600 |
| C  | -1.47474800 | 1.54615500  | 2.68696000  |
| C  | -2.16331500 | 0.44398000  | 2.12706300  |
| C  | -1.44763600 | -0.77732700 | 2.50189100  |
| C  | -0.32767700 | -0.42621200 | 3.30192700  |
| C  | -0.28985600 | 1.02571600  | 3.37218000  |
| Rh | -0.07743700 | 0.53099400  | 1.35616400  |
| C  | 0.34196900  | -0.10043700 | -1.70589700 |
| O  | 0.84135200  | 0.86765700  | -2.26271100 |
| C  | 0.73184200  | 1.82542000  | 4.10945300  |
| H  | 0.45176000  | 1.92149500  | 5.16625800  |
| H  | 1.70851900  | 1.33983400  | 4.05483500  |
| H  | 0.82527800  | 2.82800500  | 3.68796000  |
| C  | -1.84345600 | 2.98774900  | 2.55831700  |
| H  | -2.47203000 | 3.29890000  | 3.40135600  |
| H  | -0.95270000 | 3.61897900  | 2.54630900  |
| H  | -2.38757400 | 3.16168600  | 1.62950700  |
| C  | -3.41219000 | 0.50340100  | 1.30829100  |
| H  | -4.29654800 | 0.48218400  | 1.95757100  |

|   |             |             |             |
|---|-------------|-------------|-------------|
| H | -3.42588100 | 1.40876400  | 0.70192100  |
| H | -3.47942900 | -0.34538200 | 0.62595600  |
| C | -1.89393900 | -2.16004400 | 2.16284400  |
| H | -2.51526900 | -2.55031700 | 2.97929800  |
| H | -2.50079200 | -2.16035000 | 1.25741300  |
| H | -1.05491500 | -2.83948900 | 2.00631000  |
| C | 0.72167600  | -1.33811600 | 3.84872200  |
| H | 0.80529000  | -1.23557200 | 4.93587600  |
| H | 0.49897200  | -2.37936100 | 3.61044900  |
| H | 1.68563700  | -1.08912100 | 3.38941900  |
| O | 0.39430200  | 2.21139900  | 0.24038900  |
| C | -0.50790600 | 2.65990100  | -0.57252800 |
| O | -1.63318400 | 2.14439000  | -0.72983300 |
| C | -0.13973200 | 3.94666200  | -1.33470800 |
| C | -0.83991500 | 5.10907500  | -0.59955300 |
| H | -0.46815000 | 5.20667300  | 0.42650300  |
| H | -0.64546500 | 6.05410200  | -1.11828400 |
| H | -1.92227600 | 4.95169600  | -0.56421000 |
| C | 1.37603900  | 4.17508700  | -1.36461000 |
| H | 1.88269900  | 3.33432700  | -1.84079000 |
| H | 1.60240300  | 5.08993100  | -1.92464400 |
| H | 1.78047400  | 4.27957400  | -0.35472600 |
| C | -0.68379600 | 3.83502700  | -2.76899200 |
| H | -0.21557800 | 2.99100000  | -3.28163300 |
| H | -1.76521400 | 3.67953400  | -2.75985000 |
| H | -0.46437900 | 4.75212600  | -3.32663100 |
| C | 0.38576600  | -2.28661700 | -0.64148800 |
| C | 1.00381100  | -1.05874100 | -0.82124000 |
| C | 2.25280600  | -0.65707500 | -0.03178200 |
| O | 1.84892200  | -0.06351400 | 1.17916600  |
| H | -1.56563500 | 0.51370700  | -2.04086500 |
| H | 2.76887700  | -1.58990200 | 0.22943100  |
| C | 3.26254700  | 0.15651100  | -0.82380200 |
| C | 3.96101400  | -0.45763300 | -1.86846600 |
| C | 3.54492900  | 1.47969500  | -0.49153700 |
| C | 4.91903000  | 0.25173100  | -2.58989600 |
| H | 3.74292700  | -1.49397300 | -2.11890700 |
| C | 4.50731300  | 2.18967300  | -1.21073600 |
| H | 2.97979600  | 1.94094400  | 0.30825800  |
| C | 5.19517700  | 1.58137300  | -2.26171400 |
| H | 5.45183800  | -0.23039700 | -3.40510600 |
| H | 4.71348600  | 3.22553800  | -0.95519500 |
| H | 5.94240300  | 2.13716100  | -2.82115400 |
| C | -3.12022500 | -1.59903700 | -1.92300800 |

|   |             |             |             |
|---|-------------|-------------|-------------|
| C | -3.71042100 | -0.72909500 | -2.85451700 |
| C | -3.93748800 | -2.53543600 | -1.26613400 |
| C | -5.07828300 | -0.78628000 | -3.11062200 |
| H | -3.09685000 | -0.02080500 | -3.40105200 |
| C | -5.30276100 | -2.59468000 | -1.52900500 |
| H | -3.50402500 | -3.20683800 | -0.53317900 |
| C | -5.88011300 | -1.71682300 | -2.44885800 |
| H | -5.51590200 | -0.10653800 | -3.83489300 |
| H | -5.91872000 | -3.32065300 | -1.00737100 |
| H | -6.94617200 | -1.75917000 | -2.64884700 |
| H | -1.37181200 | -3.52596000 | -0.92918500 |
| C | 1.07262200  | -3.40854100 | 0.07987500  |
| O | 0.60180200  | -4.00628300 | 1.03068200  |
| O | 2.25243600  | -3.71227800 | -0.48029100 |
| C | 3.04326900  | -4.72800900 | 0.18433600  |
| C | 4.38256500  | -4.77482700 | -0.52233700 |
| H | 2.50623800  | -5.67978900 | 0.12978800  |
| H | 3.13883900  | -4.45697600 | 1.23980300  |
| H | 5.02513900  | -5.52525200 | -0.05223700 |
| H | 4.25771200  | -5.03763700 | -1.57638900 |
| H | 4.88254000  | -3.80395400 | -0.46588600 |

**TS-9**

|    |             |             |             |
|----|-------------|-------------|-------------|
| N  | -3.68869900 | 1.66837600  | -0.69828800 |
| C  | -3.96112000 | 0.32650100  | -0.81227000 |
| C  | -2.94982600 | -0.50874100 | -1.21631800 |
| C  | 1.90177400  | -0.50862800 | 2.68322700  |
| C  | 1.50135300  | 0.82503000  | 2.38642400  |
| C  | 0.05178600  | 0.82576100  | 2.22777300  |
| C  | -0.42941000 | -0.49737200 | 2.40539900  |
| C  | 0.72342700  | -1.35322100 | 2.64016500  |
| Rh | 0.96579200  | -0.56416800 | 0.71113600  |
| C  | -2.47091100 | 2.33177400  | -0.96150600 |
| O  | -2.44970400 | 3.56208500  | -0.88783900 |
| C  | 0.66291900  | -2.81944800 | 2.92372200  |
| H  | 0.48565100  | -2.99763500 | 3.99176400  |
| H  | -0.14828100 | -3.28767200 | 2.36198400  |
| H  | 1.59664400  | -3.31390300 | 2.64856800  |
| C  | 3.28728800  | -0.96830900 | 2.99819600  |
| H  | 3.45979300  | -0.89458400 | 4.07944100  |
| H  | 3.43124200  | -2.00991500 | 2.70363000  |
| H  | 4.02161700  | -0.36552500 | 2.46639600  |
| C  | 2.39779700  | 2.01837700  | 2.36669300  |
| H  | 2.66260600  | 2.31118600  | 3.39082200  |

|   |             |             |             |
|---|-------------|-------------|-------------|
| H | 3.31030400  | 1.78558500  | 1.81626400  |
| H | 1.91992800  | 2.86910700  | 1.88161500  |
| C | -0.78476100 | 2.04448400  | 2.02060200  |
| H | -0.89876700 | 2.56937000  | 2.97751800  |
| H | -0.32519800 | 2.73785000  | 1.31750200  |
| H | -1.77933600 | 1.79287400  | 1.65321400  |
| C | -1.83795100 | -0.98609400 | 2.29735100  |
| H | -2.16972100 | -1.42388400 | 3.24537700  |
| H | -2.52358500 | -0.17943100 | 2.03329700  |
| H | -1.90265800 | -1.74779000 | 1.51429700  |
| O | 2.48627600  | -1.47521200 | -0.31258500 |
| C | 3.65972300  | -0.92343500 | -0.44298500 |
| O | 4.07168300  | 0.05636300  | 0.18554700  |
| C | 4.50022200  | -1.58659600 | -1.55637100 |
| C | 5.95772400  | -1.12253500 | -1.45577800 |
| H | 6.40656300  | -1.43555400 | -0.50790500 |
| H | 6.54669000  | -1.55229800 | -2.27353200 |
| H | 6.02360200  | -0.03377500 | -1.50828100 |
| C | 4.41594800  | -3.11839900 | -1.44708200 |
| H | 3.38200700  | -3.45749900 | -1.53278900 |
| H | 5.00642500  | -3.58520400 | -2.24332800 |
| H | 4.81286600  | -3.46731600 | -0.48695900 |
| C | 3.88703000  | -1.12885100 | -2.89805300 |
| H | 2.82979900  | -1.39867600 | -2.95925200 |
| H | 3.96901200  | -0.04232300 | -3.01252600 |
| H | 4.42133100  | -1.59460400 | -3.73369900 |
| C | -1.68639900 | 0.07387000  | -1.43636600 |
| C | -1.40523500 | 1.40881800  | -1.27716600 |
| C | 0.05997900  | 1.62633400  | -1.66184200 |
| O | 0.61765800  | 0.28856000  | -1.47595300 |
| H | -4.44774900 | 2.30870000  | -0.50001800 |
| H | 0.08091900  | 1.80097000  | -2.74964000 |
| C | 0.98665800  | 2.65303700  | -1.05054000 |
| C | 0.55584200  | 3.92650100  | -0.65713600 |
| C | 2.35634300  | 2.36060600  | -1.03728600 |
| C | 1.48776400  | 4.87552800  | -0.22998300 |
| H | -0.49929200 | 4.17075700  | -0.69772300 |
| C | 3.28104200  | 3.31258600  | -0.61418500 |
| H | 2.70251300  | 1.38416400  | -1.33904800 |
| C | 2.85098000  | 4.57560700  | -0.20778100 |
| H | 1.14096500  | 5.85785300  | 0.07782700  |
| H | 4.33342200  | 3.04870600  | -0.59183600 |
| H | 3.56969800  | 5.31978600  | 0.12296800  |
| C | -5.31470600 | -0.12783200 | -0.44676200 |

|   |             |             |             |
|---|-------------|-------------|-------------|
| C | -6.03600200 | 0.50507600  | 0.57866100  |
| C | -5.89673000 | -1.21732600 | -1.11379200 |
| C | -7.30892700 | 0.05847200  | 0.92706200  |
| H | -5.58795000 | 1.32616600  | 1.13081400  |
| C | -7.16752700 | -1.66249800 | -0.76098600 |
| H | -5.35721500 | -1.69569000 | -1.92432200 |
| C | -7.87870700 | -1.02572800 | 0.25863400  |
| H | -7.85128500 | 0.55223800  | 1.72731600  |
| H | -7.60833900 | -2.50147100 | -1.29019100 |
| H | -8.87083800 | -1.37259500 | 0.52978500  |
| H | -3.08601200 | -1.57845800 | -1.27966200 |
| C | -0.45264200 | -0.63195400 | -1.91243900 |
| O | -0.31198200 | -1.31947700 | -2.89502100 |
| O | -0.28030500 | -1.82925900 | -0.33019700 |
| C | 0.17785100  | -3.09488900 | -0.76950400 |
| C | -1.02204500 | -4.00675500 | -1.00063300 |
| H | 0.85370600  | -3.51896300 | -0.01680300 |
| H | 0.74961400  | -2.98635400 | -1.69878000 |
| H | -0.69560600 | -5.00385000 | -1.31729600 |
| H | -1.61772200 | -4.11093500 | -0.08654600 |
| H | -1.65944700 | -3.59346100 | -1.78784300 |

**INT-4i**

|    |             |             |             |
|----|-------------|-------------|-------------|
| N  | 1.81117000  | 0.64656300  | 0.73186000  |
| C  | 2.35577400  | -1.54416300 | 0.88938500  |
| C  | 1.35337500  | -2.22317800 | 0.28048700  |
| C  | 0.13591800  | 2.65715800  | -2.16790700 |
| C  | 1.55345500  | 2.63641400  | -1.94354500 |
| C  | 1.99605000  | 1.29931200  | -2.13890000 |
| C  | 0.85541000  | 0.48558200  | -2.52014500 |
| C  | -0.30062800 | 1.34998500  | -2.56574600 |
| Rh | 0.44085400  | 1.06918200  | -0.44317100 |
| C  | 2.00189400  | -0.29471000 | 1.67106200  |
| O  | 2.05112700  | -0.16990100 | 2.88850800  |
| C  | -1.65748800 | 1.02030300  | -3.10363300 |
| H  | -1.70906700 | 1.25653100  | -4.17390300 |
| H  | -1.90708200 | -0.03352300 | -2.98236800 |
| H  | -2.43504900 | 1.60242200  | -2.60288700 |
| C  | -0.74181200 | 3.86200000  | -2.06581900 |
| H  | -0.90559200 | 4.29354000  | -3.06109500 |
| H  | -1.71934400 | 3.59759800  | -1.65471200 |
| H  | -0.29492400 | 4.61704700  | -1.42018200 |
| C  | 2.39432400  | 3.80137100  | -1.53422500 |
| H  | 2.35928200  | 4.59262700  | -2.29185500 |



|   |             |             |             |
|---|-------------|-------------|-------------|
| H | 2.02443500  | 4.20838200  | -0.58989800 |
| H | 3.43601400  | 3.50397900  | -1.40081700 |
| C | 3.39905500  | 0.81314100  | -1.96510100 |
| H | 4.06703200  | 1.31756600  | -2.67121400 |
| H | 3.74975600  | 1.01833500  | -0.94931700 |
| H | 3.47489400  | -0.26260800 | -2.12880600 |
| C | 0.93750400  | -0.93321200 | -2.98497400 |
| H | 1.50719400  | -0.98996800 | -3.91997900 |
| H | 1.43631700  | -1.56662200 | -2.24635700 |
| H | -0.05351400 | -1.34890500 | -3.16610000 |
| O | 0.39056200  | 3.84148000  | 0.92242200  |
| C | -0.62169800 | 3.22040600  | 1.22461900  |
| O | -0.93685100 | 2.02864800  | 0.75663900  |
| C | -1.66524600 | 3.76455100  | 2.22302200  |
| C | -1.47974900 | 2.99573800  | 3.54939700  |
| H | -0.46337100 | 3.12010100  | 3.93462900  |
| H | -2.18007300 | 3.37765000  | 4.29972600  |
| H | -1.66498600 | 1.92487600  | 3.42984600  |
| C | -1.41052200 | 5.26040400  | 2.44932100  |
| H | -1.53168000 | 5.82531600  | 1.52000400  |
| H | -2.12220200 | 5.65131000  | 3.18400800  |
| H | -0.39617100 | 5.43413100  | 2.81337400  |
| C | -3.09054900 | 3.54646600  | 1.68119000  |
| H | -3.22632100 | 4.05168200  | 0.71828400  |
| H | -3.31648200 | 2.48698600  | 1.54481700  |
| H | -3.82019900 | 3.96496600  | 2.38232700  |
| C | -0.06176600 | -1.85675800 | 0.24285900  |
| C | -0.61970100 | -0.64580700 | 0.00196600  |
| C | -2.12194300 | -0.34459300 | 0.05700100  |
| O | -2.50127600 | -0.07526000 | 1.40109600  |
| H | -2.02084800 | 0.74570000  | 1.60577900  |
| H | -2.27552800 | 0.57363700  | -0.52379700 |
| C | -3.08349500 | -1.35063200 | -0.55694500 |
| C | -2.74791700 | -2.12856900 | -1.66976100 |
| C | -4.39012000 | -1.41925900 | -0.05806500 |
| C | -3.69124600 | -2.96862100 | -2.26457300 |
| H | -1.73324800 | -2.11818400 | -2.04950000 |
| C | -5.33307000 | -2.25670000 | -0.65198600 |
| H | -4.64652400 | -0.81752800 | 0.80549300  |
| C | -4.98873500 | -3.03594900 | -1.75924600 |
| H | -3.40316400 | -3.57827800 | -3.11564700 |
| H | -6.33993600 | -2.30278200 | -0.24686800 |
| H | -5.72230200 | -3.69143300 | -2.21870700 |
| C | 3.77128900  | -1.94391600 | 0.83283400  |

|   |             |             |             |
|---|-------------|-------------|-------------|
| C | 4.64844900  | -1.63200400 | 1.88630900  |
| C | 4.27552500  | -2.62887000 | -0.28751900 |
| C | 5.98756700  | -2.00978000 | 1.82133000  |
| H | 4.26208400  | -1.11030100 | 2.75456000  |
| C | 5.61326100  | -3.00872600 | -0.34498400 |
| H | 3.61418600  | -2.85151500 | -1.11932600 |
| C | 6.47512000  | -2.69963600 | 0.70981900  |
| H | 6.65211800  | -1.76789200 | 2.64523400  |
| H | 5.98654400  | -3.53667100 | -1.21747100 |
| H | 7.51999400  | -2.99104300 | 0.66288000  |
| H | 1.56707000  | -3.21295400 | -0.11679900 |
| C | -0.89380900 | -3.11191800 | 0.39884100  |
| O | -0.69879200 | -4.11439800 | -0.26279400 |
| O | -1.80600800 | -3.00474500 | 1.36416000  |
| C | -2.73793600 | -4.10691100 | 1.48332500  |
| C | -3.64715700 | -3.78896400 | 2.65140900  |
| H | -2.17199600 | -5.03143900 | 1.62818300  |
| H | -3.28856600 | -4.18556600 | 0.54174800  |
| H | -4.39217500 | -4.58213700 | 2.76884500  |
| H | -3.07514000 | -3.70808900 | 3.57977700  |
| H | -4.16445200 | -2.84238700 | 2.48088100  |

**TS-4i**

|    |             |             |             |
|----|-------------|-------------|-------------|
| N  | 1.94160900  | 0.07787100  | 0.42408700  |
| C  | 1.81684400  | -1.96602000 | 0.86569900  |
| C  | 0.61011600  | -2.42167400 | 0.42642900  |
| C  | 0.73227600  | 2.55656800  | -2.26203900 |
| C  | 2.03420900  | 1.96513700  | -2.22769800 |
| C  | 1.87794300  | 0.57798400  | -2.55442800 |
| C  | 0.48454400  | 0.33014700  | -2.85570300 |
| C  | -0.23066600 | 1.56568400  | -2.67965900 |
| Rh | 0.63419000  | 0.85941200  | -0.71492200 |
| C  | 1.87819200  | -0.58368200 | 1.56313900  |
| O  | 1.98824300  | -0.36676800 | 2.75619100  |
| C  | -1.66308000 | 1.82860600  | -3.02810900 |
| H  | -1.75222000 | 2.14892700  | -4.07355000 |
| H  | -2.28707400 | 0.94211900  | -2.89702200 |
| H  | -2.08273100 | 2.62304700  | -2.40612000 |
| C  | 0.42490600  | 3.98204800  | -1.93125400 |
| H  | 0.45429500  | 4.59796300  | -2.83846900 |
| H  | -0.57088500 | 4.07701900  | -1.49240600 |
| H  | 1.14890600  | 4.37446400  | -1.21626300 |
| C  | 3.30718500  | 2.66000100  | -1.86273500 |
| H  | 3.56231400  | 3.42326300  | -2.60709300 |

|   |             |             |             |
|---|-------------|-------------|-------------|
| H | 3.20338800  | 3.13771000  | -0.88535400 |
| H | 4.13560500  | 1.95110600  | -1.80805300 |
| C | 2.97712400  | -0.43632300 | -2.60742800 |
| H | 3.59555000  | -0.28591800 | -3.49973500 |
| H | 3.61705700  | -0.36152700 | -1.72547600 |
| H | 2.57597300  | -1.45080900 | -2.63960000 |
| C | -0.05712700 | -0.95983900 | -3.38872100 |
| H | 0.32800000  | -1.14401700 | -4.39847900 |
| H | 0.22967900  | -1.80636300 | -2.75892200 |
| H | -1.14528900 | -0.93756600 | -3.44507700 |
| O | 1.88746800  | 3.12581500  | 0.98103600  |
| C | 0.74768300  | 2.90905100  | 1.38085700  |
| O | -0.10350900 | 2.08738100  | 0.80450200  |
| C | 0.17969700  | 3.57122600  | 2.65394200  |
| C | 0.04779900  | 2.46831900  | 3.72785600  |
| H | 0.99719600  | 1.94660300  | 3.87491300  |
| H | -0.25922800 | 2.91609100  | 4.67924200  |
| H | -0.69859100 | 1.71977000  | 3.45071600  |
| C | 1.15308000  | 4.65374600  | 3.13683800  |
| H | 1.28585200  | 5.43214600  | 2.37987800  |
| H | 0.76556600  | 5.12032700  | 4.04876900  |
| H | 2.13556100  | 4.22776900  | 3.34985900  |
| C | -1.19816300 | 4.19348400  | 2.35942400  |
| H | -1.12687400 | 4.95712900  | 1.57665400  |
| H | -1.92317500 | 3.44246200  | 2.03728900  |
| H | -1.58719500 | 4.67592000  | 3.26239300  |
| C | -0.64059700 | -1.69233000 | 0.33855700  |
| C | -0.84714900 | -0.40486300 | -0.05237800 |
| C | -2.18384300 | 0.33437900  | 0.06137200  |
| O | -2.35907900 | 0.74755900  | 1.41002400  |
| H | -1.60329400 | 1.34878400  | 1.55401200  |
| H | -2.09072900 | 1.23744700  | -0.55373800 |
| C | -3.43688100 | -0.35893600 | -0.44333800 |
| C | -3.41144200 | -1.25904500 | -1.51310400 |
| C | -4.67135700 | -0.00615400 | 0.11479300  |
| C | -4.59579300 | -1.80861400 | -2.00903200 |
| H | -2.46279000 | -1.56895500 | -1.93440600 |
| C | -5.85364600 | -0.55335100 | -0.38074000 |
| H | -4.68411900 | 0.68873500  | 0.94617800  |
| C | -5.82184200 | -1.45753000 | -1.44572300 |
| H | -4.55414500 | -2.52013400 | -2.82825600 |
| H | -6.80315600 | -0.27569600 | 0.06799700  |
| H | -6.74301100 | -1.88676900 | -1.82799500 |
| C | 3.07346400  | -2.72119600 | 0.76610600  |

|   |             |             |             |
|---|-------------|-------------|-------------|
| C | 4.08874500  | -2.56031600 | 1.72504600  |
| C | 3.28430200  | -3.60930900 | -0.30414700 |
| C | 5.27679100  | -3.27886100 | 1.61671200  |
| H | 3.92871100  | -1.88270800 | 2.55626600  |
| C | 4.47015300  | -4.33090400 | -0.40308300 |
| H | 2.51560800  | -3.71952400 | -1.06297100 |
| C | 5.47155500  | -4.16658500 | 0.55682400  |
| H | 6.05138000  | -3.14893200 | 2.36625500  |
| H | 4.61815300  | -5.01344300 | -1.23455200 |
| H | 6.39937100  | -4.72469400 | 0.47624600  |
| H | 0.52548600  | -3.48496200 | 0.21010200  |
| C | -1.78962400 | -2.64541700 | 0.59949000  |
| O | -1.90132500 | -3.70785600 | 0.01732500  |
| O | -2.60901300 | -2.21031500 | 1.55438600  |
| C | -3.81238800 | -2.98879200 | 1.76620800  |
| C | -4.54464300 | -2.35652700 | 2.93070400  |
| H | -3.52919600 | -4.02733300 | 1.95881000  |
| H | -4.39977500 | -2.95812700 | 0.84422600  |
| H | -5.48195300 | -2.89100200 | 3.11416500  |
| H | -3.93814700 | -2.39478000 | 3.83973900  |
| H | -4.77235600 | -1.31137600 | 2.71092800  |

**TS-3ii**

|    |             |             |             |
|----|-------------|-------------|-------------|
| N  | 0.03673800  | -0.20213300 | 0.91648600  |
| C  | -2.08188500 | 0.90223600  | 1.17749600  |
| C  | -1.73474700 | 1.75885000  | 0.14241100  |
| C  | -1.06152700 | -3.14386500 | -1.60738800 |
| C  | -2.11968300 | -2.31488000 | -1.20577000 |
| C  | -2.05746800 | -1.08355200 | -1.99815000 |
| C  | -0.99148100 | -1.21478800 | -2.95727600 |
| C  | -0.31803600 | -2.43265800 | -2.65774500 |
| Rh | -0.15869600 | -1.12868900 | -0.91734100 |
| C  | -1.09882100 | -0.00004100 | 1.75980300  |
| O  | -1.14996000 | -0.57326600 | 2.84823100  |
| C  | 0.89721900  | -2.97212600 | -3.34544100 |
| H  | 0.61587300  | -3.71112300 | -4.10578800 |
| H  | 1.45903200  | -2.17463500 | -3.83532500 |
| H  | 1.56294200  | -3.46707000 | -2.63314800 |
| C  | -0.67695300 | -4.48335400 | -1.06040200 |
| H  | -0.92793300 | -5.28842500 | -1.76208700 |
| H  | 0.40013100  | -4.53616400 | -0.87404700 |
| H  | -1.18765000 | -4.68915500 | -0.11716200 |
| C  | -3.12427600 | -2.55127900 | -0.12393300 |
| H  | -4.11919400 | -2.72715300 | -0.55005400 |

|   |             |             |             |
|---|-------------|-------------|-------------|
| H | -2.86073700 | -3.41386700 | 0.49107800  |
| H | -3.20115500 | -1.67977500 | 0.53280100  |
| C | -3.11254100 | -0.02726800 | -2.03401000 |
| H | -3.80056700 | -0.22372700 | -2.86643400 |
| H | -3.69463600 | -0.01428900 | -1.11328700 |
| H | -2.68387500 | 0.96663400  | -2.17998300 |
| C | -0.65028600 | -0.21341700 | -4.01612300 |
| H | -1.24619200 | -0.38272200 | -4.92172500 |
| H | -0.85514100 | 0.80147400  | -3.66581800 |
| H | 0.40620400  | -0.26534500 | -4.28688400 |
| O | 1.08292000  | -0.80828300 | 1.73731200  |
| C | 1.86988400  | -1.63958800 | 1.10602200  |
| O | 1.73305400  | -1.90285400 | -0.10667300 |
| C | 2.89195100  | -2.33106800 | 1.98977500  |
| C | 3.19942300  | -1.49975700 | 3.24533300  |
| H | 2.30009200  | -1.33363300 | 3.84149500  |
| H | 3.92810600  | -2.04030500 | 3.85708100  |
| H | 3.62164300  | -0.52819300 | 2.98153400  |
| C | 2.23220300  | -3.67522500 | 2.39033600  |
| H | 2.00767300  | -4.28272200 | 1.50881100  |
| H | 2.92257100  | -4.23401600 | 3.02907500  |
| H | 1.30634700  | -3.50546200 | 2.94737400  |
| C | 4.17008100  | -2.58961300 | 1.17582100  |
| H | 3.95619400  | -3.16738000 | 0.27372000  |
| H | 4.64101200  | -1.64791400 | 0.88404200  |
| H | 4.87870200  | -3.15283900 | 1.78977900  |
| C | -0.51912800 | 1.85884000  | -0.57174500 |
| C | 0.44248500  | 0.81681700  | -0.62311400 |
| C | 1.91125200  | 1.09968100  | -0.93329600 |
| O | 2.52343300  | 0.14630100  | -1.79341100 |
| H | 2.48075200  | -0.71851000 | -1.35791000 |
| H | 1.89862200  | 2.01174900  | -1.52951900 |
| C | 2.75692300  | 1.40982600  | 0.30121500  |
| C | 2.23151300  | 2.12170900  | 1.38637900  |
| C | 4.10762300  | 1.04733400  | 0.31826500  |
| C | 3.04057800  | 2.45085800  | 2.47216200  |
| H | 1.18724300  | 2.41239600  | 1.38291500  |
| C | 4.91908400  | 1.37981500  | 1.40558600  |
| H | 4.51625000  | 0.51714600  | -0.53442700 |
| C | 4.38800400  | 2.08204200  | 2.48755000  |
| H | 2.61574500  | 2.99481200  | 3.31046500  |
| H | 5.96673000  | 1.09243700  | 1.40256700  |
| H | 5.01615500  | 2.34044200  | 3.33475000  |
| C | -3.45059600 | 0.97053400  | 1.75101700  |

|   |             |            |             |
|---|-------------|------------|-------------|
| C | -3.75976400 | 0.52812800 | 3.05391800  |
| C | -4.51301500 | 1.48734900 | 0.97784400  |
| C | -5.06009400 | 0.60780600 | 3.54903200  |
| H | -2.96831200 | 0.12146400 | 3.66601200  |
| C | -5.80860900 | 1.57129300 | 1.48016800  |
| H | -4.33182800 | 1.82150300 | -0.03716400 |
| C | -6.09430800 | 1.12924300 | 2.77203000  |
| H | -5.26209600 | 0.26100900 | 4.55880000  |
| H | -6.59822900 | 1.97464600 | 0.85239500  |
| H | -7.10566900 | 1.18656600 | 3.16344900  |
| H | -2.44583100 | 2.54198400 | -0.09337800 |
| C | -0.39559600 | 3.15506100 | -1.28765000 |
| O | -1.33302200 | 3.71665900 | -1.83262400 |
| O | 0.84692200  | 3.70218100 | -1.26273300 |
| C | 1.00696300  | 4.95433200 | -1.96238000 |
| C | 2.45503100  | 5.36942800 | -1.79160500 |
| H | 0.31260800  | 5.68454600 | -1.53673500 |
| H | 0.73421100  | 4.81429100 | -3.01308500 |
| H | 2.62926200  | 6.33325000 | -2.27952200 |
| H | 2.70543200  | 5.46519100 | -0.73146900 |
| H | 3.12847900  | 4.63065900 | -2.23588500 |

**INT-4ii**

|    |             |             |             |
|----|-------------|-------------|-------------|
| N  | 0.15044200  | -0.71898900 | -0.32690300 |
| C  | -2.09554100 | -1.46054700 | 0.25920400  |
| C  | -1.87517200 | -0.76534300 | 1.45911200  |
| C  | -0.63897900 | 2.64689000  | -2.42324600 |
| C  | -1.75578300 | 2.09291000  | -1.78136700 |
| C  | -1.69044100 | 2.46461800  | -0.36579300 |
| C  | -0.57610900 | 3.35482600  | -0.17598900 |
| C  | 0.13644400  | 3.38080700  | -1.41026400 |
| Rh | 0.15417700  | 1.31729200  | -0.72744400 |
| C  | -1.05437700 | -1.53441900 | -0.70589400 |
| O  | -0.99173400 | -2.07732200 | -1.80102300 |
| C  | 1.39228900  | 4.14110800  | -1.70653900 |
| H  | 1.16429200  | 5.08417900  | -2.21892400 |
| H  | 1.93867500  | 4.37804000  | -0.79096100 |
| H  | 2.05505900  | 3.56208300  | -2.35493000 |
| C  | -0.22873900 | 2.49639700  | -3.85502600 |
| H  | -0.37678300 | 3.43027200  | -4.41116700 |
| H  | 0.82993300  | 2.23062100  | -3.93391000 |
| H  | -0.80506000 | 1.71282200  | -4.35113100 |
| C  | -2.81241200 | 1.20434000  | -2.35474100 |
| H  | -3.78640800 | 1.70806400  | -2.35224100 |

|   |             |             |             |
|---|-------------|-------------|-------------|
| H | -2.58262300 | 0.91269600  | -3.38092800 |
| H | -2.91898200 | 0.28963500  | -1.76272100 |
| C | -2.79403500 | 2.21666900  | 0.61139200  |
| H | -3.55817600 | 2.99782600  | 0.50608100  |
| H | -3.27553300 | 1.25535000  | 0.42769400  |
| H | -2.44612300 | 2.22555700  | 1.64445400  |
| C | -0.26106800 | 4.11839600  | 1.07190800  |
| H | -0.82286700 | 5.06121400  | 1.10035600  |
| H | -0.51820200 | 3.54136700  | 1.96020400  |
| H | 0.80234900  | 4.36186800  | 1.13322900  |
| O | 1.29974900  | -1.37237400 | -0.91394800 |
| C | 2.08672900  | -0.59945800 | -1.65613300 |
| O | 1.91563700  | 0.61724300  | -1.76226400 |
| C | 3.18797000  | -1.35889100 | -2.37195600 |
| C | 3.17013100  | -2.85634400 | -2.02564700 |
| H | 2.21768900  | -3.31515700 | -2.30072000 |
| H | 3.96913600  | -3.35382000 | -2.58364100 |
| H | 3.33672800  | -3.02429600 | -0.95987000 |
| C | 2.93603200  | -1.15765600 | -3.88382900 |
| H | 2.94552600  | -0.09677900 | -4.14589400 |
| H | 3.72492600  | -1.66427700 | -4.44738100 |
| H | 1.97343600  | -1.58470100 | -4.18085700 |
| C | 4.53078900  | -0.71950600 | -1.96373500 |
| H | 4.55548000  | 0.34027600  | -2.22876100 |
| H | 4.69039700  | -0.80870600 | -0.88743300 |
| H | 5.34349000  | -1.23205500 | -2.48666600 |
| C | -0.72418700 | -0.08679000 | 1.82581000  |
| C | 0.43024500  | -0.04800700 | 0.92618600  |
| C | 1.81464300  | -0.26414600 | 1.56012300  |
| O | 2.85741400  | 0.43483800  | 0.88294900  |
| H | 2.46075400  | 1.27268700  | 0.59422600  |
| H | 1.71703300  | 0.14720500  | 2.56621600  |
| C | 2.21988200  | -1.72505800 | 1.69464800  |
| C | 1.26972400  | -2.73192900 | 1.90115000  |
| C | 3.57598900  | -2.06941400 | 1.66159900  |
| C | 1.66808000  | -4.06047700 | 2.04276800  |
| H | 0.21456700  | -2.48560200 | 1.93975800  |
| C | 3.97335000  | -3.39919300 | 1.81029600  |
| H | 4.31460500  | -1.29026100 | 1.51660400  |
| C | 3.02052100  | -4.40140400 | 1.99486200  |
| H | 0.91611900  | -4.83037500 | 2.18752500  |
| H | 5.02982000  | -3.65038400 | 1.77956000  |
| H | 3.32823900  | -5.43699000 | 2.10401600  |
| C | -3.41701300 | -2.05645700 | -0.04031600 |

|   |             |             |             |
|---|-------------|-------------|-------------|
| C | -3.56550400 | -3.14699900 | -0.91904600 |
| C | -4.58313500 | -1.53514700 | 0.55487600  |
| C | -4.82156900 | -3.69210300 | -1.17593700 |
| H | -2.68900100 | -3.55644000 | -1.40271700 |
| C | -5.83604900 | -2.08607500 | 0.29886300  |
| H | -4.51448400 | -0.67921200 | 1.21849600  |
| C | -5.96509600 | -3.17054700 | -0.56956800 |
| H | -4.90455600 | -4.53617400 | -1.85503000 |
| H | -6.71478800 | -1.65831500 | 0.77337200  |
| H | -6.94189500 | -3.59859900 | -0.77400100 |
| H | -2.67861000 | -0.72971300 | 2.18596200  |
| C | -0.80128300 | 0.68866000  | 3.06291200  |
| O | -1.73058000 | 0.66280100  | 3.85782600  |
| O | 0.25900300  | 1.53790100  | 3.24216400  |
| C | 0.23272600  | 2.32112800  | 4.45013900  |
| C | 1.53176900  | 3.10143700  | 4.50624500  |
| H | 0.11390600  | 1.65330600  | 5.30817500  |
| H | -0.64100900 | 2.98122500  | 4.42869300  |
| H | 1.56150400  | 3.71503900  | 5.41181700  |
| H | 2.39127800  | 2.42506200  | 4.51903500  |
| H | 1.62824800  | 3.76189800  | 3.63964900  |

**TS-5i**

|    |             |             |             |
|----|-------------|-------------|-------------|
| N  | -1.16704500 | -0.12481600 | -1.43905600 |
| C  | -1.75921900 | -1.38833300 | -1.21522700 |
| C  | -1.09623000 | -2.37361200 | -0.55068700 |
| C  | -1.86420500 | 1.96550800  | 1.99290600  |
| C  | -2.69133800 | 0.88340200  | 1.58022000  |
| C  | -2.10552600 | -0.35736600 | 2.05231600  |
| C  | -0.90908300 | -0.02084000 | 2.77361700  |
| C  | -0.73497900 | 1.40396400  | 2.71537500  |
| Rh | -0.66384900 | 0.64481600  | 0.67718500  |
| C  | 0.13688100  | -0.00209500 | -1.50938100 |
| O  | 1.01226500  | 0.49653200  | -2.12709100 |
| C  | 0.35798800  | 2.19549200  | 3.35443400  |
| H  | 0.02018500  | 2.59942000  | 4.31674600  |
| H  | 1.24170400  | 1.57909700  | 3.51832700  |
| H  | 0.64802400  | 3.03263500  | 2.71602700  |
| C  | -2.11706600 | 3.42045100  | 1.76289900  |
| H  | -2.75856800 | 3.82309300  | 2.55725500  |
| H  | -1.18256500 | 3.98378900  | 1.76892300  |
| H  | -2.59643500 | 3.59207200  | 0.79891900  |
| C  | -3.94937400 | 1.01201600  | 0.78567100  |
| H  | -4.79115000 | 1.23620600  | 1.45276500  |



|   |             |             |             |
|---|-------------|-------------|-------------|
| H | -3.86736100 | 1.82316700  | 0.05905700  |
| H | -4.18106100 | 0.09543300  | 0.24279400  |
| C | -2.74281000 | -1.70800600 | 2.00640800  |
| H | -3.33216700 | -1.86725800 | 2.91855200  |
| H | -3.41566000 | -1.80511400 | 1.15388300  |
| H | -2.00054500 | -2.50575200 | 1.94248800  |
| C | -0.00675000 | -0.98090300 | 3.47852100  |
| H | -0.27023700 | -1.02419800 | 4.54267800  |
| H | -0.09874800 | -1.98783700 | 3.06797800  |
| H | 1.03212200  | -0.65894300 | 3.39086100  |
| O | -0.86049300 | 3.10992900  | -1.14858800 |
| C | 0.27938900  | 3.06914300  | -0.69187200 |
| O | 0.69889700  | 2.13881400  | 0.13439500  |
| C | 1.35678000  | 4.11710400  | -1.03561800 |
| C | 2.48594900  | 3.41808800  | -1.81860800 |
| H | 2.10592000  | 2.97697400  | -2.74384300 |
| H | 3.26277800  | 4.14661000  | -2.07666000 |
| H | 2.93975100  | 2.61590100  | -1.23366200 |
| C | 0.73329600  | 5.23019200  | -1.88637100 |
| H | -0.07186500 | 5.73707600  | -1.34673800 |
| H | 1.49583700  | 5.97175200  | -2.14853800 |
| H | 0.30762400  | 4.82389300  | -2.80641400 |
| C | 1.92216100  | 4.70416900  | 0.27172500  |
| H | 1.13312600  | 5.17872200  | 0.86721300  |
| H | 2.39290900  | 3.92807700  | 0.87976500  |
| H | 2.67333500  | 5.46871700  | 0.04612800  |
| C | 0.21774600  | -2.17404800 | 0.02123200  |
| C | 0.79500800  | -0.93086900 | 0.17255500  |
| C | 2.21908500  | -0.69360400 | 0.66969400  |
| O | 2.29413500  | 0.44348700  | 1.51929300  |
| H | 1.94935500  | 1.20715900  | 1.01227100  |
| H | 2.49987100  | -1.53260600 | 1.31485300  |
| C | 3.27085800  | -0.62881900 | -0.44743800 |
| C | 3.24257600  | -1.48641700 | -1.55248000 |
| C | 4.32516000  | 0.28197400  | -0.33182600 |
| C | 4.24113600  | -1.42868200 | -2.52207100 |
| H | 2.43198600  | -2.19526500 | -1.66369800 |
| C | 5.32340500  | 0.34518700  | -1.30592700 |
| H | 4.35484400  | 0.94244600  | 0.52651500  |
| C | 5.28618600  | -0.51013200 | -2.40554500 |
| H | 4.19553400  | -2.09568400 | -3.37836000 |
| H | 6.12930800  | 1.06620600  | -1.20204200 |
| H | 6.05990000  | -0.46123100 | -3.16611000 |
| C | -3.12703900 | -1.50830900 | -1.74735300 |

|   |             |             |             |
|---|-------------|-------------|-------------|
| C | -3.67447600 | -0.45965900 | -2.50871100 |
| C | -3.93065500 | -2.63353900 | -1.48066500 |
| C | -4.97726900 | -0.54055800 | -2.99450300 |
| H | -3.06265200 | 0.41434600  | -2.69818200 |
| C | -5.23192900 | -2.70818000 | -1.96635400 |
| H | -3.54275300 | -3.45134600 | -0.88338800 |
| C | -5.76280200 | -1.66237900 | -2.72656700 |
| H | -5.38072500 | 0.27914000  | -3.58138700 |
| H | -5.83598100 | -3.58359900 | -1.74761400 |
| H | -6.78026300 | -1.72160500 | -3.10076900 |
| H | -1.53006300 | -3.35848200 | -0.45190600 |
| C | 0.80587300  | -3.42671600 | 0.60160100  |
| O | 0.14069000  | -4.21022200 | 1.25830400  |
| O | 2.11366000  | -3.57946800 | 0.36182400  |
| C | 2.76990400  | -4.72039000 | 0.96486900  |
| C | 4.23613500  | -4.62037800 | 0.59536000  |
| H | 2.30099500  | -5.63264500 | 0.58435600  |
| H | 2.60564300  | -4.68667600 | 2.04604100  |
| H | 4.78614600  | -5.46633800 | 1.01814500  |
| H | 4.36274800  | -4.62701700 | -0.49028000 |
| H | 4.66987300  | -3.69303700 | 0.97883300  |

**INT-6i**

|    |             |             |             |
|----|-------------|-------------|-------------|
| N  | -0.29193400 | -0.69718100 | 0.34689100  |
| C  | -0.16967800 | -1.93473900 | -0.21610200 |
| C  | 1.04001800  | -2.59656700 | -0.21310800 |
| C  | -4.12165900 | 0.60526200  | 0.46086200  |
| C  | -3.55049800 | -0.38989500 | 1.33522500  |
| C  | -2.68701600 | 0.29604300  | 2.27226600  |
| C  | -2.72750100 | 1.69811200  | 1.96807200  |
| C  | -3.61753300 | 1.89647900  | 0.83834400  |
| Rh | -1.95457000 | 0.62844600  | 0.26347200  |
| C  | 0.75623000  | -0.14381200 | 1.06228900  |
| O  | 0.55165600  | 0.87732500  | 1.77530900  |
| C  | -3.95435300 | 3.21115100  | 0.20831900  |
| H  | -4.75362600 | 3.71799100  | 0.76221200  |
| H  | -3.08270000 | 3.86909700  | 0.19137400  |
| H  | -4.29014500 | 3.07813900  | -0.82217300 |
| C  | -5.04837500 | 0.31544700  | -0.67487200 |
| H  | -6.08577500 | 0.29763600  | -0.31949000 |
| H  | -4.96780100 | 1.07372600  | -1.45572900 |
| H  | -4.82350800 | -0.65589800 | -1.11936400 |
| C  | -3.90256400 | -1.84086700 | 1.36339000  |
| H  | -4.76740800 | -2.00037500 | 2.01998800  |

|   |             |             |             |
|---|-------------|-------------|-------------|
| H | -4.15235100 | -2.21646800 | 0.37096800  |
| H | -3.07637700 | -2.44196000 | 1.74200700  |
| C | -1.90396700 | -0.33228800 | 3.37924100  |
| H | -2.45575700 | -0.25643100 | 4.32402200  |
| H | -1.71936900 | -1.38912200 | 3.17775600  |
| H | -0.93802100 | 0.16244800  | 3.48312500  |
| C | -1.92542000 | 2.74725600  | 2.66489300  |
| H | -2.30253300 | 2.89834100  | 3.68308800  |
| H | -0.88144700 | 2.42817700  | 2.71247300  |
| H | -1.97099300 | 3.69928100  | 2.13451700  |
| O | -1.64564700 | 0.78419500  | -1.90500200 |
| C | -0.69246100 | 1.61944800  | -1.71958900 |
| O | -0.53263800 | 2.06283600  | -0.54195600 |
| C | 0.28024300  | 1.95460600  | -2.83598100 |
| C | 1.05215400  | 3.23815300  | -2.49993900 |
| H | 1.58306500  | 3.14383000  | -1.55205400 |
| H | 1.78522200  | 3.44258900  | -3.28685600 |
| H | 0.37614900  | 4.09672300  | -2.43179900 |
| C | 1.25299900  | 0.75181200  | -2.90385700 |
| H | 0.71710700  | -0.17117500 | -3.14237600 |
| H | 2.00348400  | 0.93132600  | -3.68054500 |
| H | 1.77411400  | 0.61979900  | -1.95304500 |
| C | -0.47749600 | 2.09552900  | -4.16599000 |
| H | -1.04699200 | 1.19104100  | -4.39157900 |
| H | -1.17434800 | 2.93998100  | -4.13600800 |
| H | 0.23310600  | 2.27330700  | -4.97946900 |
| C | 2.18688800  | -1.98029100 | 0.34207200  |
| C | 2.07412200  | -0.75764400 | 0.97826400  |
| C | 3.19472400  | 0.02598700  | 1.66153400  |
| O | 2.82709900  | 0.39032100  | 2.97848300  |
| H | 1.93638800  | 0.78519300  | 2.86070400  |
| H | 4.07011300  | -0.61459300 | 1.75795700  |
| C | 3.58910500  | 1.22970500  | 0.79558100  |
| C | 4.05330800  | 1.04480000  | -0.51368700 |
| C | 3.50875200  | 2.52736200  | 1.30368000  |
| C | 4.43314900  | 2.13573900  | -1.29439800 |
| H | 4.12237700  | 0.04096100  | -0.91683900 |
| C | 3.87992700  | 3.62166600  | 0.51997700  |
| H | 3.16323500  | 2.66635200  | 2.32087800  |
| C | 4.34584100  | 3.43137400  | -0.78113000 |
| H | 4.79149900  | 1.97385800  | -2.30739000 |
| H | 3.80650300  | 4.62539600  | 0.92942600  |
| H | 4.63474900  | 4.28280900  | -1.39046400 |
| C | -1.36388300 | -2.65082900 | -0.74730200 |

|   |             |             |             |
|---|-------------|-------------|-------------|
| C | -2.19188200 | -2.14217300 | -1.75716800 |
| C | -1.64428100 | -3.92389900 | -0.22389600 |
| C | -3.28330500 | -2.88371800 | -2.21285400 |
| H | -1.97218400 | -1.17635400 | -2.19051000 |
| C | -2.73735100 | -4.66094700 | -0.67804900 |
| H | -1.00231000 | -4.32606800 | 0.55364900  |
| C | -3.56643200 | -4.14014500 | -1.67271300 |
| H | -3.90637400 | -2.48020100 | -3.00637300 |
| H | -2.94102500 | -5.63938000 | -0.25331200 |
| H | -4.41708500 | -4.71213200 | -2.03127300 |
| H | 1.12712100  | -3.58006600 | -0.65314800 |
| C | 3.44288200  | -2.78815300 | 0.20129100  |
| O | 3.45143300  | -3.99732200 | 0.08056800  |
| O | 4.56672500  | -2.04361400 | 0.17206400  |
| C | 5.81093200  | -2.76399500 | 0.02516800  |
| C | 6.92383900  | -1.73625600 | 0.07474700  |
| H | 5.78783200  | -3.30946600 | -0.92327600 |
| H | 5.88716300  | -3.50221600 | 0.82876800  |
| H | 7.89194300  | -2.22932400 | -0.05537100 |
| H | 6.80260700  | -0.99191700 | -0.71696200 |
| H | 6.92775800  | -1.21286000 | 1.03478800  |

**INT-10i**

|   |             |             |             |
|---|-------------|-------------|-------------|
| N | 1.61385600  | -1.12971800 | -0.97941400 |
| C | 2.16635800  | -0.13116300 | -0.22003500 |
| C | 1.34322900  | 0.86955600  | 0.22449400  |
| C | 0.26651100  | -1.24534400 | -1.34060300 |
| O | -0.09891200 | -2.18621700 | -2.04589700 |
| C | -0.04416500 | 0.84408300  | -0.10518600 |
| C | -0.59008000 | -0.17636400 | -0.84239600 |
| C | -2.06418000 | -0.32245500 | -1.17214200 |
| O | -2.75644200 | 0.91838200  | -1.09189900 |
| H | -2.29186300 | 1.55501200  | -1.65184600 |
| H | -2.12944800 | -0.74480200 | -2.18287200 |
| C | -2.71870600 | -1.29650300 | -0.20604400 |
| C | -3.11193100 | -0.86689400 | 1.06661600  |
| C | -2.89047900 | -2.63493300 | -0.56865500 |
| C | -3.68819500 | -1.76928700 | 1.95880400  |
| H | -2.96045800 | 0.16688700  | 1.35473200  |
| C | -3.46204100 | -3.53692000 | 0.32974100  |
| H | -2.55285700 | -2.96698600 | -1.54437800 |
| C | -3.86578000 | -3.10580100 | 1.59356600  |
| H | -3.99571000 | -1.42881100 | 2.94336400  |
| H | -3.59339700 | -4.57538000 | 0.03976400  |

|   |             |             |             |
|---|-------------|-------------|-------------|
| H | -4.31395100 | -3.80693100 | 2.29176000  |
| C | 3.60633300  | -0.21662700 | 0.08321700  |
| C | 4.22662000  | -1.46048900 | 0.28322800  |
| C | 4.37967200  | 0.95078100  | 0.18063700  |
| C | 5.58735000  | -1.53297300 | 0.57327300  |
| H | 3.63708900  | -2.37205000 | 0.25071700  |
| C | 5.73825300  | 0.87480200  | 0.47485600  |
| H | 3.91493400  | 1.91398400  | -0.00183500 |
| C | 6.34735300  | -0.36660100 | 0.66994500  |
| H | 6.05111300  | -2.50104600 | 0.73471900  |
| H | 6.32539400  | 1.78553200  | 0.54029000  |
| H | 7.40751500  | -0.42415400 | 0.89568100  |
| H | 1.73679100  | 1.64957500  | 0.86225300  |
| H | 2.20855000  | -1.84693400 | -1.37570600 |
| C | -0.85840600 | 1.97959900  | 0.45920800  |
| O | -1.27633000 | 2.01381600  | 1.59458800  |
| O | -0.94294500 | 3.00081900  | -0.42263800 |
| C | -1.67201700 | 4.17206100  | 0.03460700  |
| C | -3.16499300 | 4.01533900  | -0.20098400 |
| H | -1.25123500 | 4.99468200  | -0.54745200 |
| H | -1.45252900 | 4.32321000  | 1.09342800  |
| H | -3.68687800 | 4.91312800  | 0.14556000  |
| H | -3.38470800 | 3.88367300  | -1.26459000 |
| H | -3.55256400 | 3.15184200  | 0.34218700  |

**TS-9i**

|   |             |             |             |
|---|-------------|-------------|-------------|
| N | 1.59462800  | -1.11660600 | -0.96854100 |
| C | 2.16517100  | -0.16480000 | -0.15713400 |
| C | 1.36104500  | 0.81079500  | 0.37688700  |
| C | 0.23798400  | -1.22280000 | -1.32552800 |
| O | -0.13180300 | -2.09927800 | -2.10394300 |
| C | -0.02026300 | 0.77511100  | 0.05591600  |
| C | -0.58180800 | -0.19930400 | -0.71357500 |
| C | -2.08658800 | -0.11217100 | -0.86017300 |
| O | -2.45387500 | 1.13975800  | -0.29900900 |
| H | -2.00522100 | 2.14082000  | -0.88750000 |
| H | -2.35649800 | -0.14130900 | -1.92436700 |
| C | -2.77771000 | -1.25579500 | -0.12942700 |
| C | -3.23399900 | -1.07493900 | 1.17917100  |
| C | -2.92687100 | -2.50012500 | -0.74960200 |
| C | -3.83869500 | -2.13112000 | 1.86075000  |
| H | -3.12537100 | -0.10401900 | 1.64940700  |
| C | -3.52997200 | -3.55439700 | -0.06408400 |
| H | -2.54470500 | -2.64417400 | -1.75417700 |

|   |             |             |             |
|---|-------------|-------------|-------------|
| C | -3.98847800 | -3.37316000 | 1.24178700  |
| H | -4.19572300 | -1.98177700 | 2.87569000  |
| H | -3.64289500 | -4.51788100 | -0.55255500 |
| H | -4.46118000 | -4.19414600 | 1.77304500  |
| C | 3.61342000  | -0.27113000 | 0.09942900  |
| C | 4.23539500  | -1.52533900 | 0.20885000  |
| C | 4.39158500  | 0.88812100  | 0.24361200  |
| C | 5.60344400  | -1.61575000 | 0.45622600  |
| H | 3.64277400  | -2.43281600 | 0.13911100  |
| C | 5.75772000  | 0.79379800  | 0.49453000  |
| H | 3.92409200  | 1.86068900  | 0.13156300  |
| C | 6.36860000  | -0.45754000 | 0.59947500  |
| H | 6.06927200  | -2.59190300 | 0.54780200  |
| H | 6.34874700  | 1.69855700  | 0.59664300  |
| H | 7.43451600  | -0.52922200 | 0.79151800  |
| H | 1.75920700  | 1.55722500  | 1.04993600  |
| H | 2.19103800  | -1.79342100 | -1.42874500 |
| C | -0.97091600 | 1.79080600  | 0.57946200  |
| O | -1.10850900 | 2.27199600  | 1.65879400  |
| O | -1.13950800 | 2.91704600  | -0.76208700 |
| C | -1.54779200 | 4.22234800  | -0.32600700 |
| C | -3.06201900 | 4.36358500  | -0.25471300 |
| H | -1.10812600 | 4.93763900  | -1.02905800 |
| H | -1.10589700 | 4.38916500  | 0.66313900  |
| H | -3.33164200 | 5.37621800  | 0.06181300  |
| H | -3.51999600 | 4.17946800  | -1.23202000 |
| H | -3.48073500 | 3.65379700  | 0.46338700  |

## References

1. B. Ma, P. Wu, X. Wang, Z. Wang, H.-X. Lin and H.-X. Dai, *Angew. Chem., Int. Ed.*, 2019, **58**, 13335–13339.
2. A. Kondoh, R. Ozawa, M. Terada, *Chem. Lett.*, 2019, **48**, 1164-1167
3. Parr, R. G.; Yang, W. *Density Functional Theory of Atoms and Molecules*. Oxford University Press: New York, 1989.
4. Frisch, M. J.; Trucks, G. W.; Schlegel, H. B.; Scuseria, G. E.; Robb, M. A.; Cheeseman, J. R.; Scalmani, G.; Barone, V.; Mennucci, B.; Petersson, G.A.; Nakatsuji, H.; Caricato, M.; Li, X.; Hratchian, H. P.; Izmaylov, A. F.; Bloino, J.; Zheng, G.; Sonnenberg, J. L.; Hada, M.; Ehara, M.; Toyota, K.; Fukuda, R.; Hasegawa, J.; Ishida, M.; Nakajima, T.; Honda, Y.; Kitao, O.; Nakai, H.; Vreven, T.; Montgomery, J. A.; Peralta, Jr., J. E.; Ogliaro, F.; Bearpark, M.; Heyd, J.J.; Brothers, E.; Kudin, K.N.; Staroverov, V. N.; Keith, T.; Kobayashi, R.; Normand, J.; Raghavachari, K.; Rendell, A.; Burant, J. C.; Iyengar, S. S.; Tomasi, J.; Cossi, M.; Rega, N.; Millam, J. M.; Klene, M.; Knox, J. E.; Cross, J. B.; Bakken, V.; Adamo, C.; Jaramillo, J.; Gomperts, R.; Stratmann, R. E.; Yazyev, O.; Austin, A. J.; Cammi, R.; Pomelli, C.; Ochterski, J. W.; Martin, R. L.; Morokuma, K.; Zakrzewski, V. G.; Voth, G.A.; Salvador, P.; Dannenberg, J. J.; Dapprich, S.; Daniels, A. D.; Farkas, O.; Foresman, J. B.; Ortiz, J. V.; Cioslowski J.; Fox, D. J. *Gaussian 09, Revision E.01*, Gaussian, Inc.: Wallingford CT, 2013.
5. (a) Lee, C.; Yang, W.; Parr, R. G. *Phys. Rev. B: Condens. Matter Mater. Phys.* 1988, **37**, 785. (b) Becke, A. D. *J. Chem. Phys.* 1993, **98**, 5648.
6. Grimme, S.; Antony, J.; Ehrlich, S.; Krieg, H. *J. Chem. Phys.* 2010, **132**, 154104.
7. Andrae, D.; Häußermann, U.; Dolg, M.; Stoll, H.; Preuß, H. *Theor. Chim. Acta* 1990, **77**, 123.
8. Ditchfield, R.; Hehre, W. J.; Pople, J. A. *J. Chem. Phys.* 1971, **54**, 724-728.
9. (a) Gonzalez, C.; Schlegel, H. B. *J. Chem. Phys.* 1989, **90**, 2154. (b) Gonzalez, C.; Schlegel, H. B. *J. Phys. Chem.* 1990, **94**, 5523.
10. Marenich, A. V.; Cramer, C. J.; Truhlar, D. G. *J. Phys. Chem. B* 2009, **113**, 6378.
11. Zhao, Y.; Truhlar, D. G. *J. Chem. Phys.* 2006, **125**, 194101.
12. Legault, C. Y. *CYLview20*. Université de Sherbrooke, 2020 (<http://www.cylview.org>)

# Copies of $^1\text{H}$ , $^{13}\text{C}$ NMR and $^{19}\text{F}$ NMR spectra

## ethyl 4-cyclopentyl-4-hydroxybut-2-ynoate (2k)

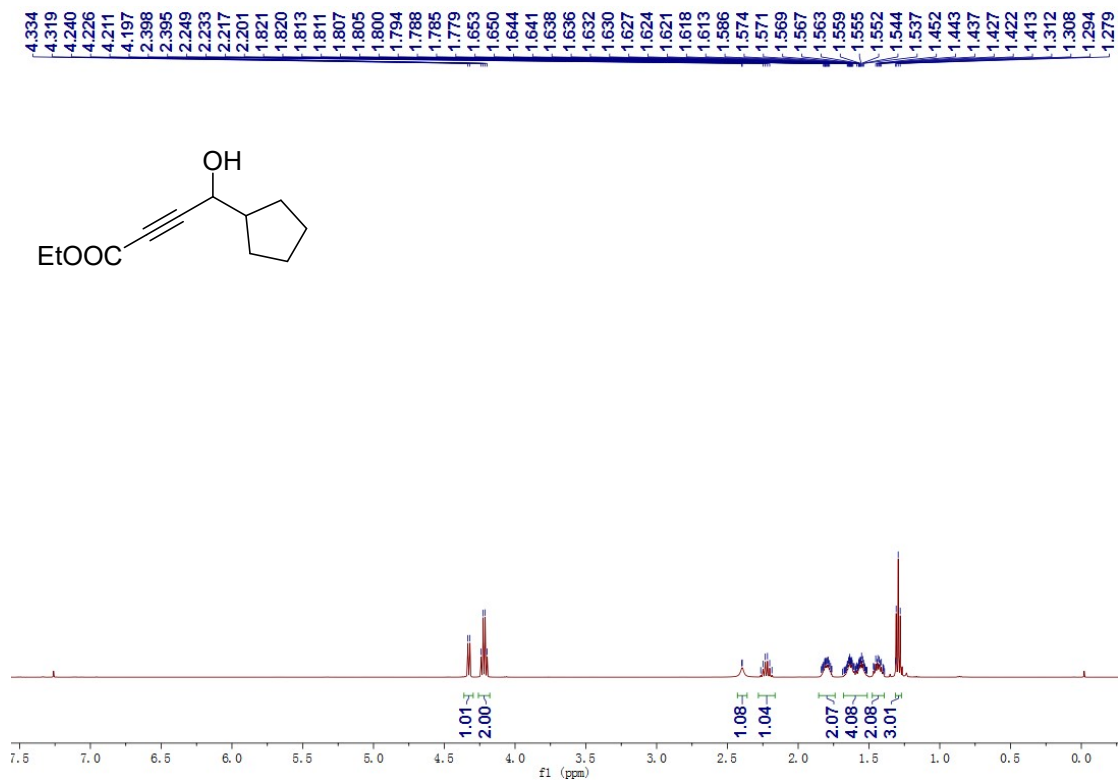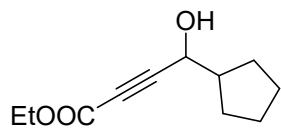



3,6-diphenyl-3,5-dihydrofuro[3,4-c]pyridine-1,4-dione (3a)

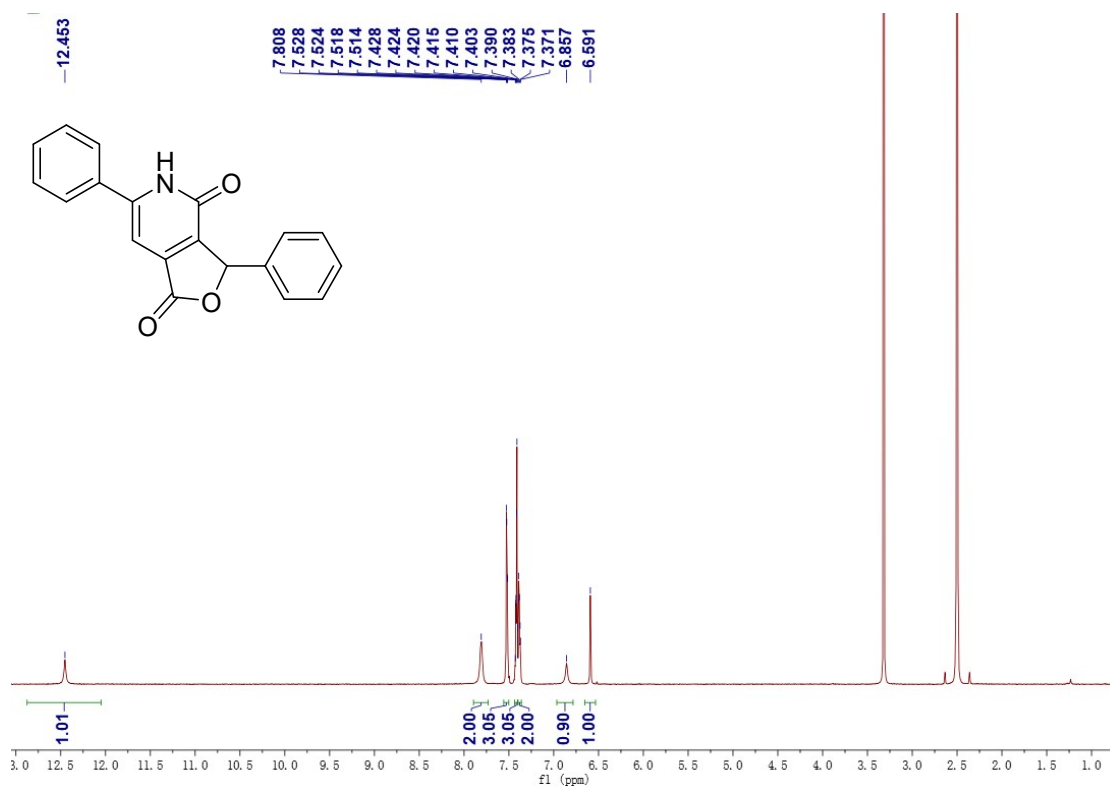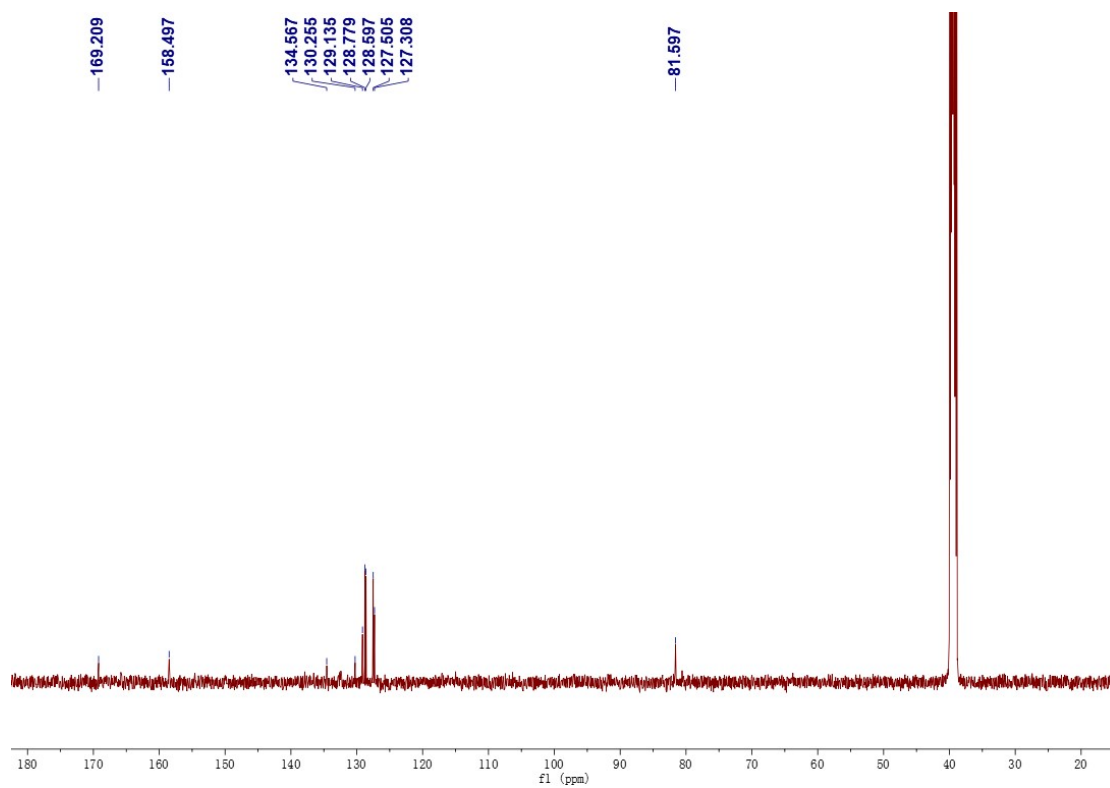

6-phenyl-3-(p-tolyl)-3,5-dihydrofuro[3,4-c]pyridine-1,4-dione (3b)

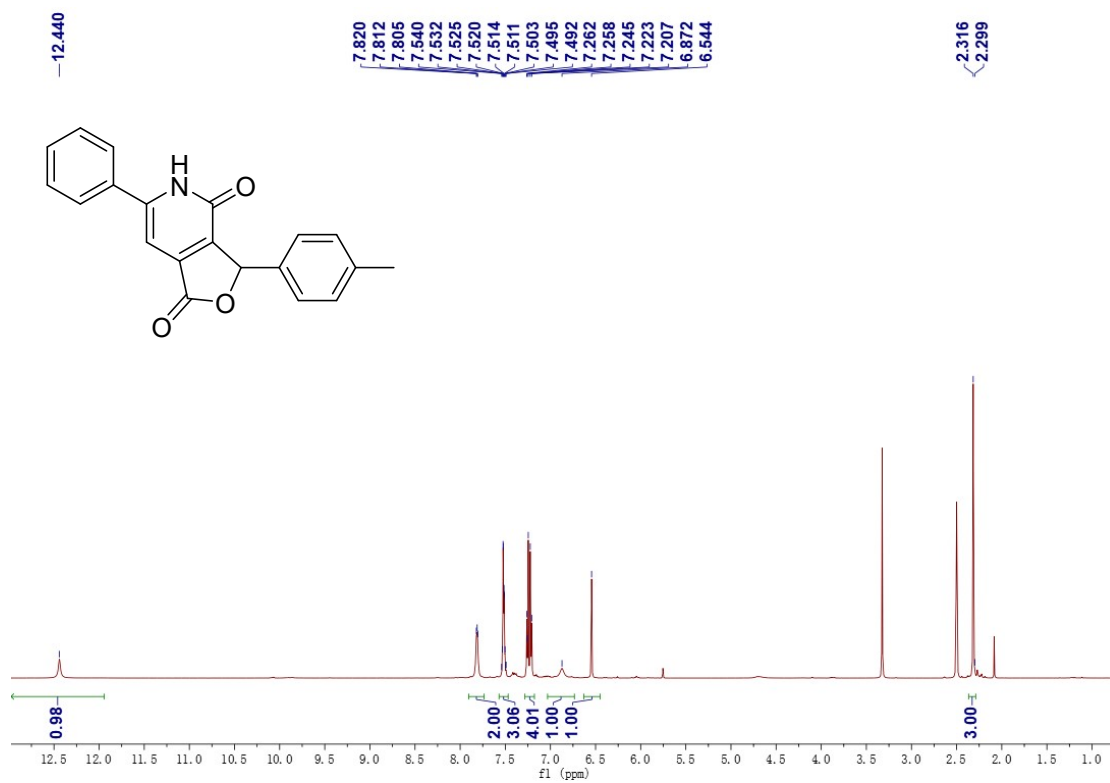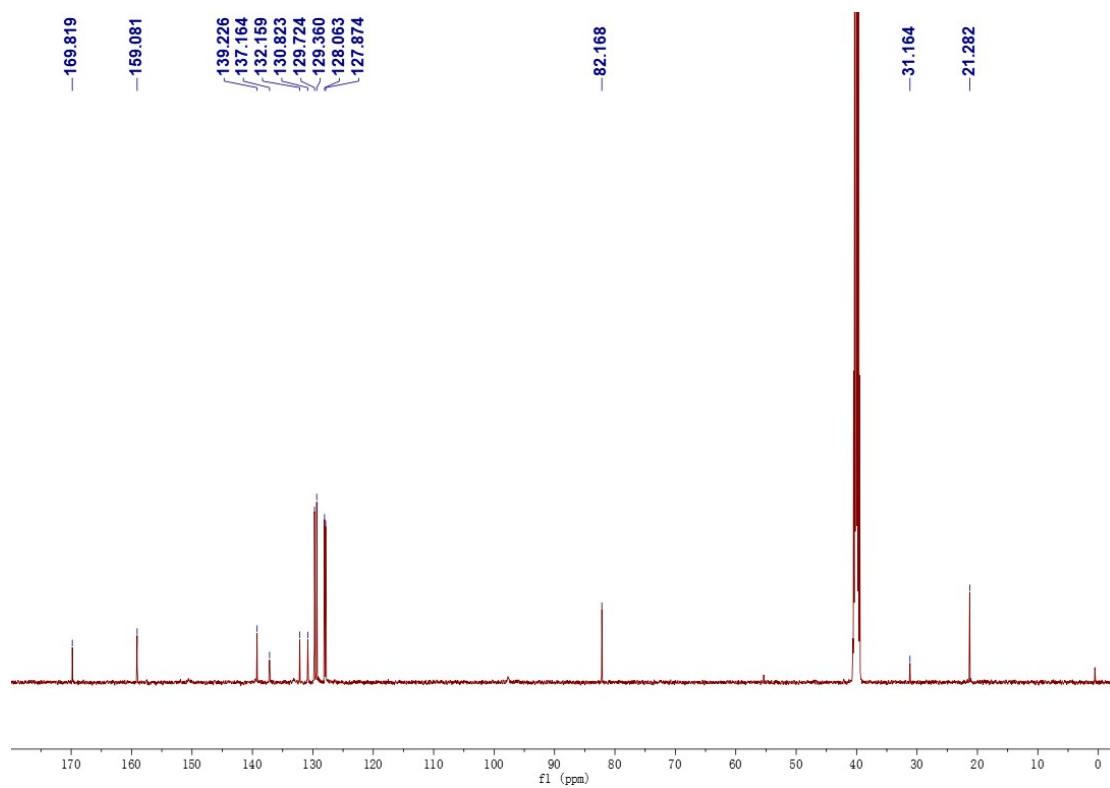

3-(4-(tert-butyl)phenyl)-6-phenyl-3,5-dihydrofuro[3,4-c]pyridine-1,4-dione (3c)

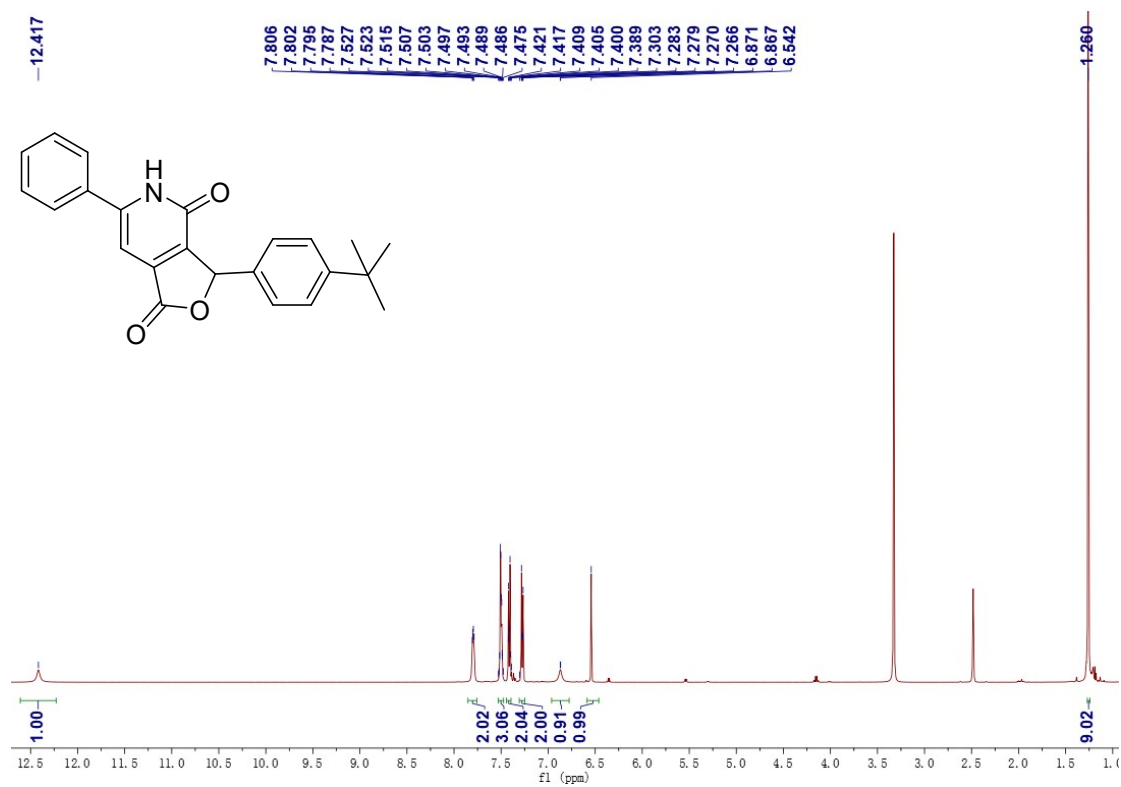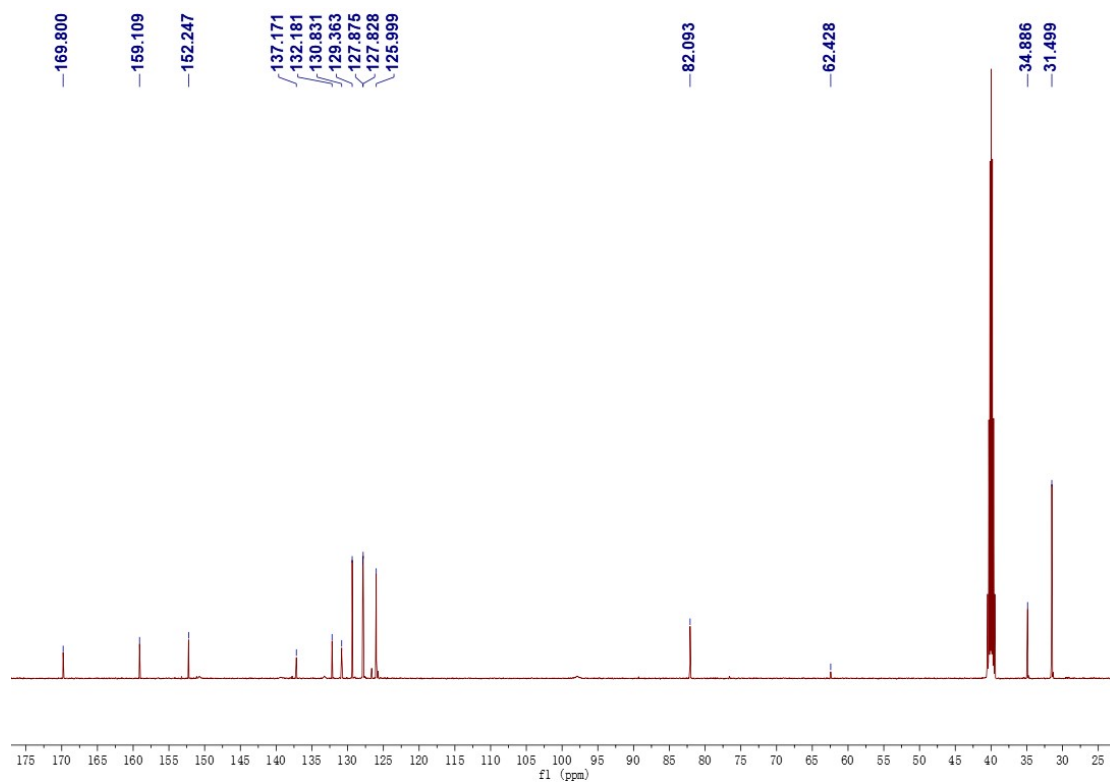

3-(4-methoxyphenyl)-6-phenyl-3,5-dihydrofuro[3,4-c]pyridine-1,4-dione (3d)

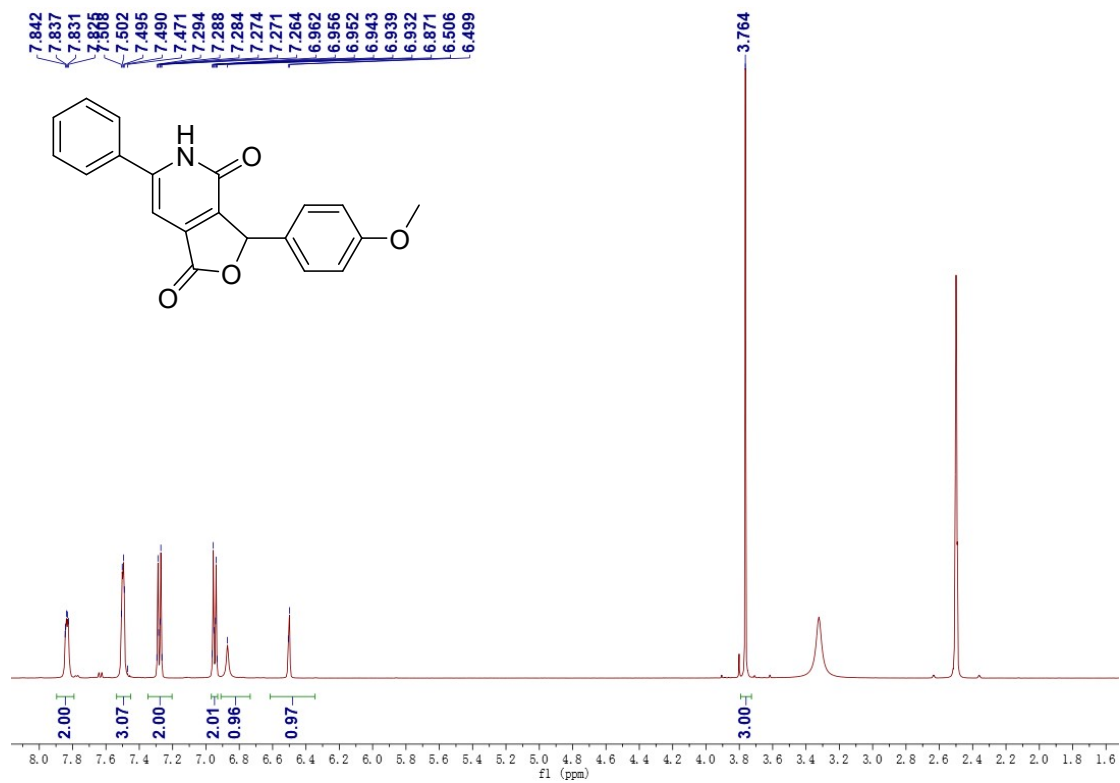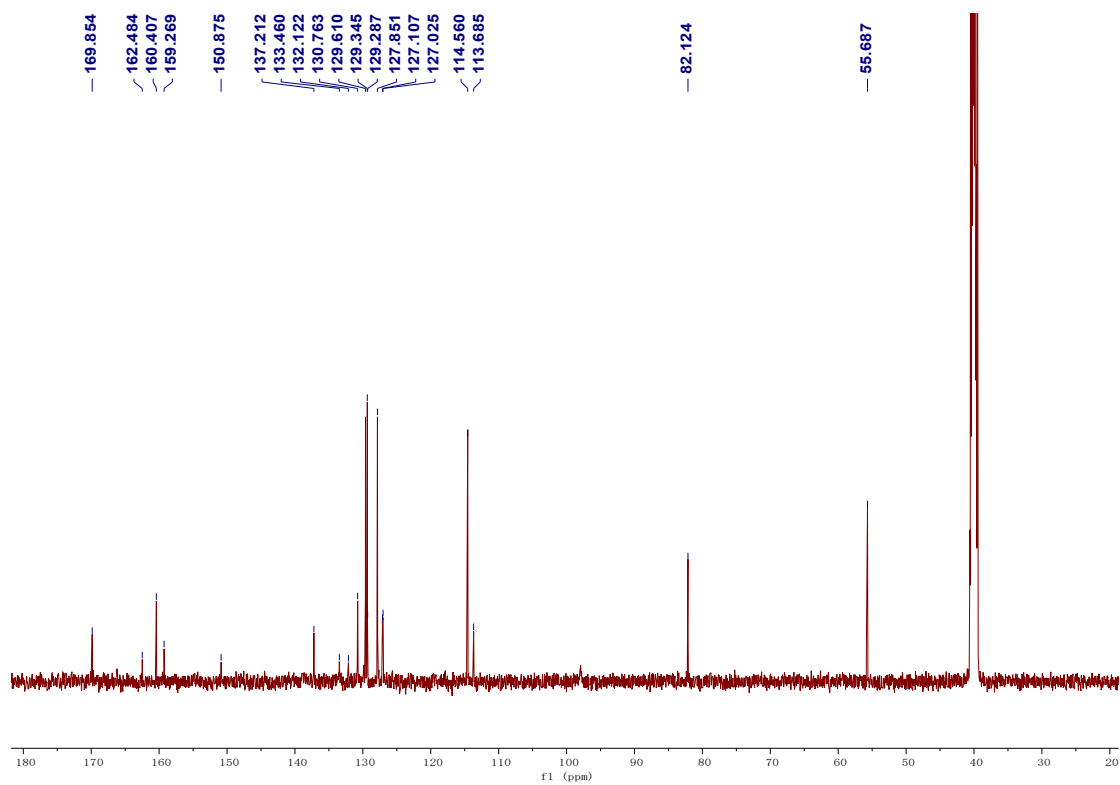

3-ethyl-6-phenyl-3,5-dihydrofuro[3,4-c]pyridine-1,4-dione (3e)

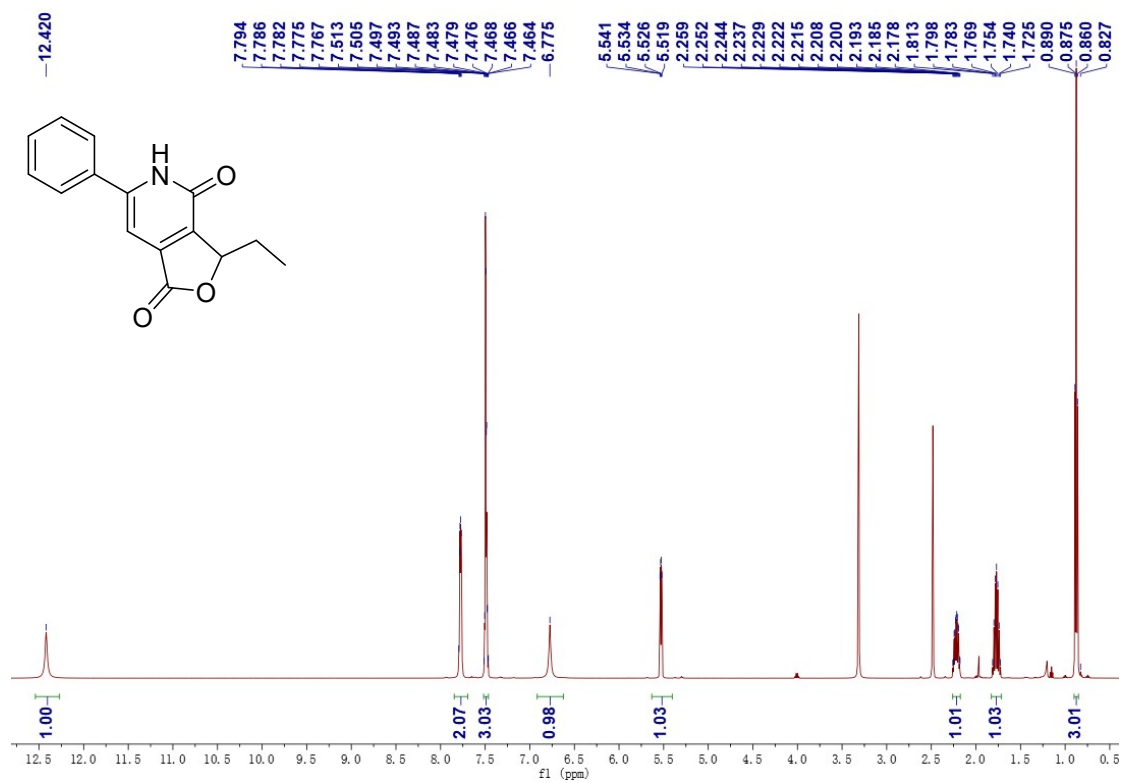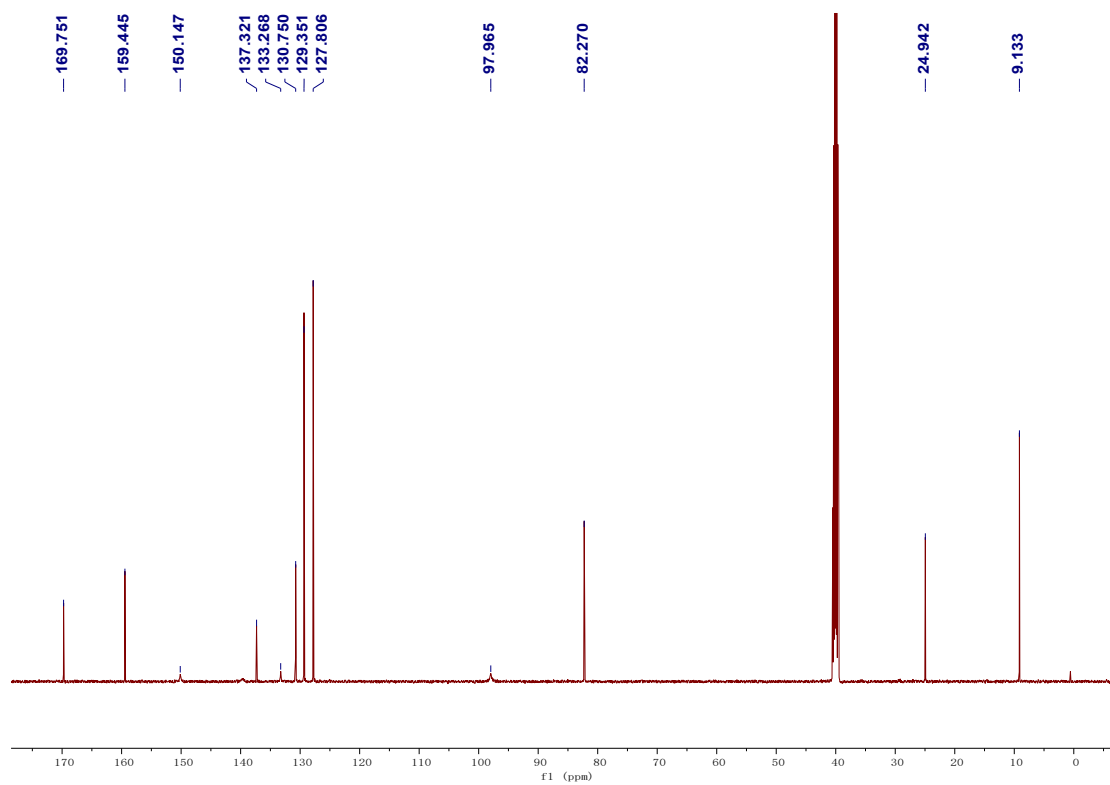

3-(4-fluorophenyl)-6-phenyl-3,5-dihydrofuro[3,4-c]pyridine-1,4-dione (3f)

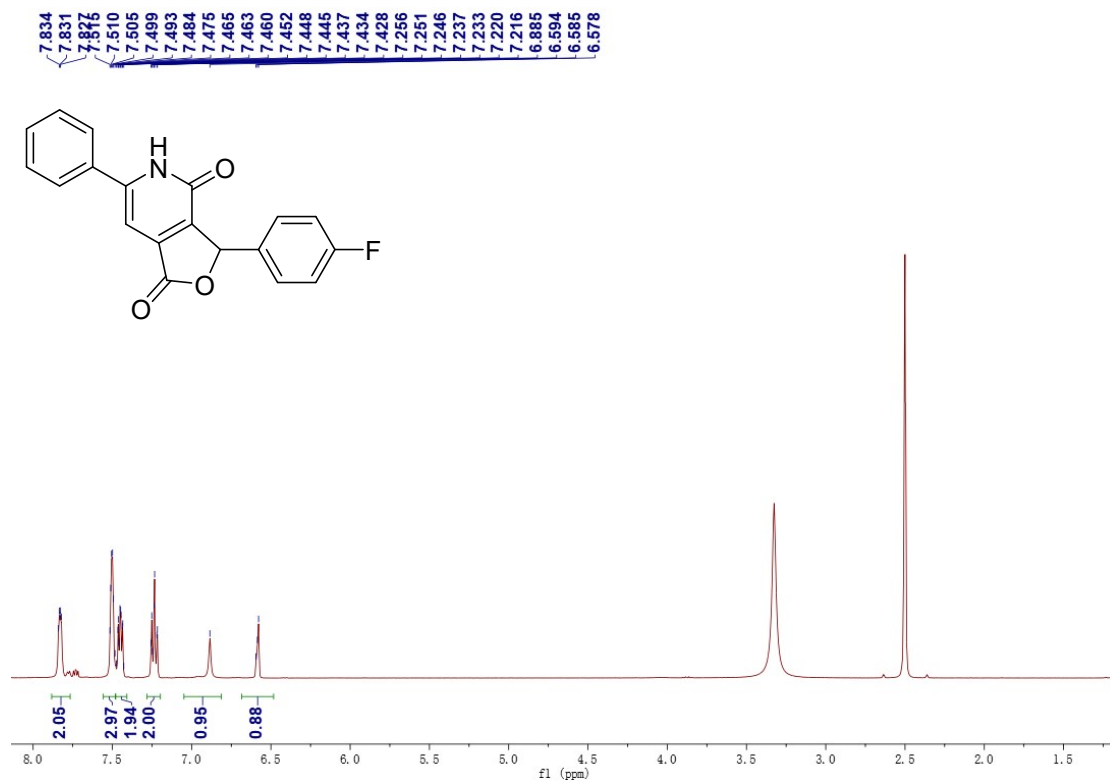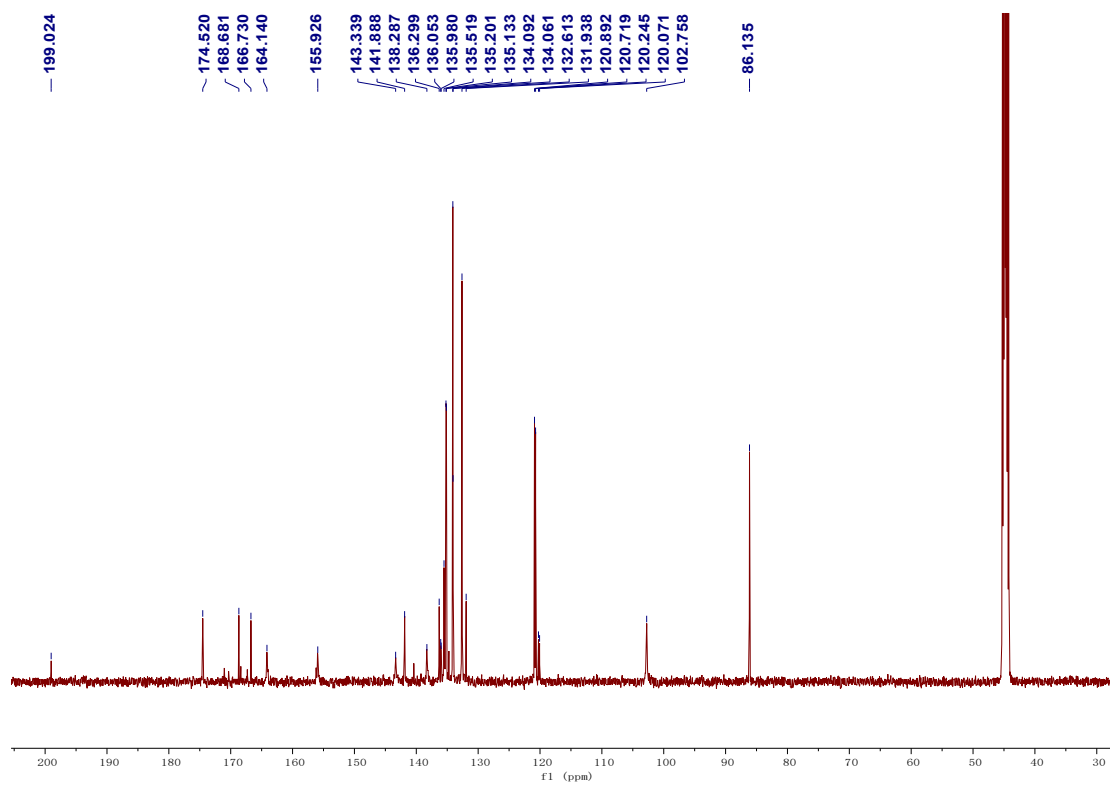

3-(4-chlorophenyl)-6-phenyl-3,5-dihydrofuro[3,4-c]pyridine-1,4-dione (3g)

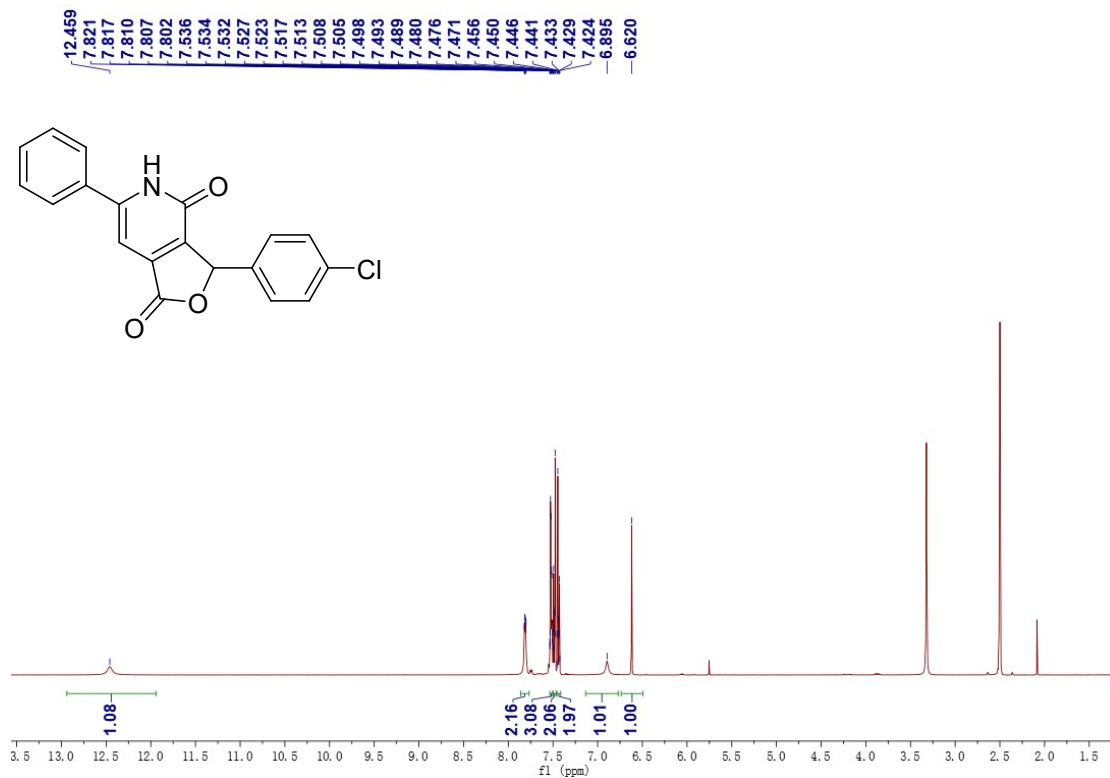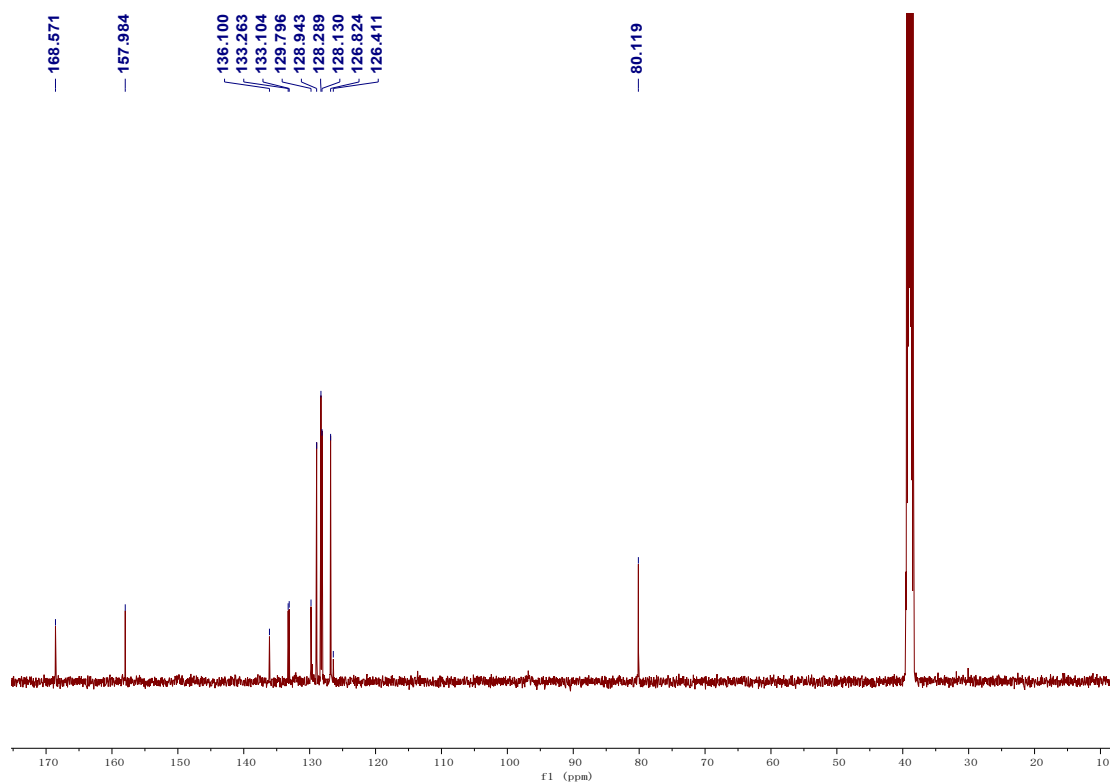

3-(4-bromophenyl)-6-phenyl-3,5-dihydrofuro[3,4-c]pyridine-1,4-dione (3h)

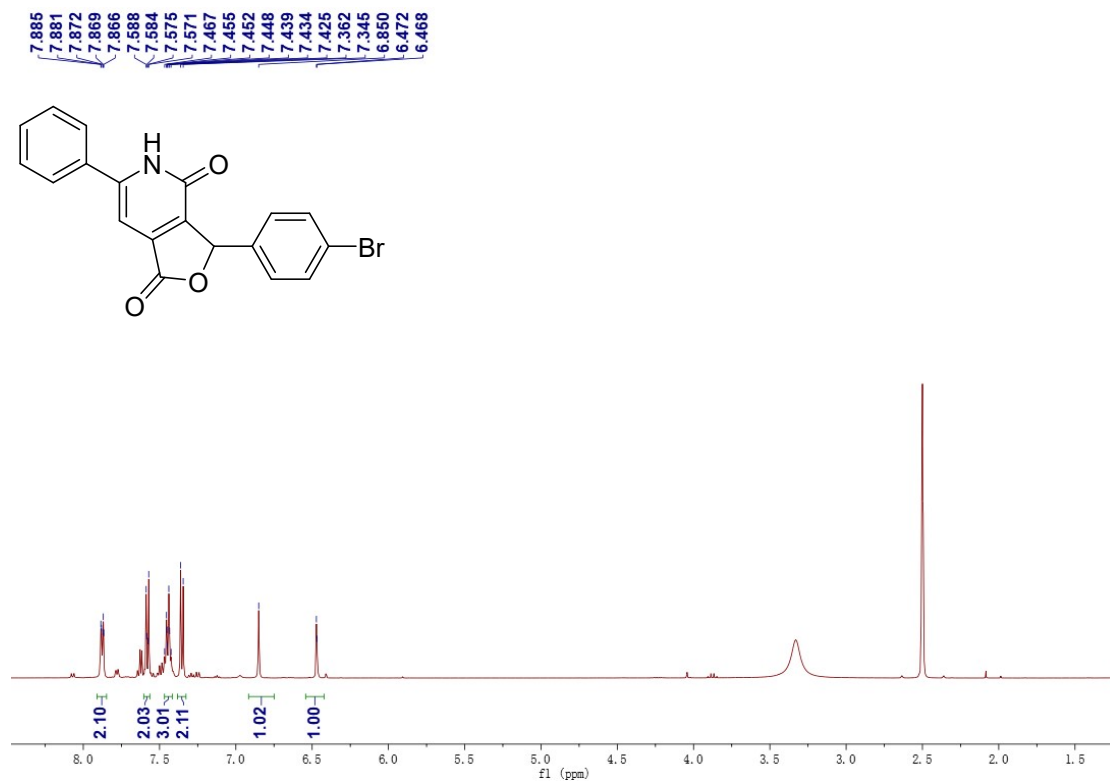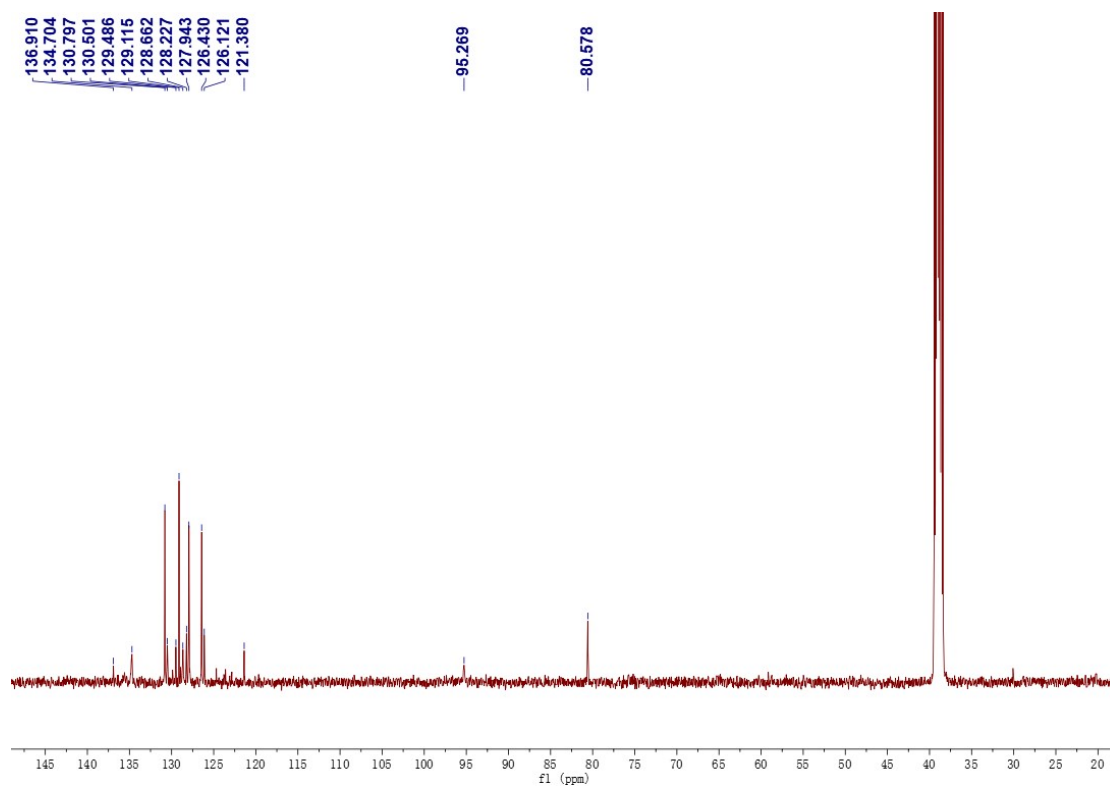



**3-(4-iodophenyl)-6-phenyl-3,5-dihydrofuro[3,4-c]pyridine-1,4-dione (3i)**

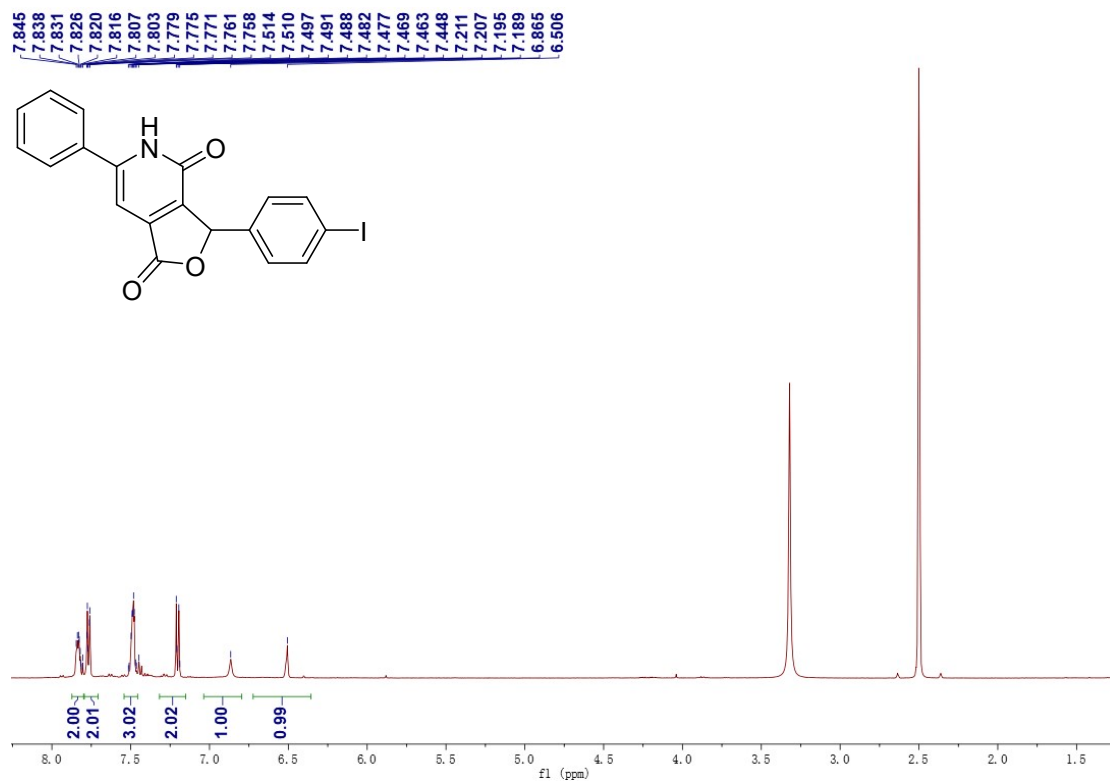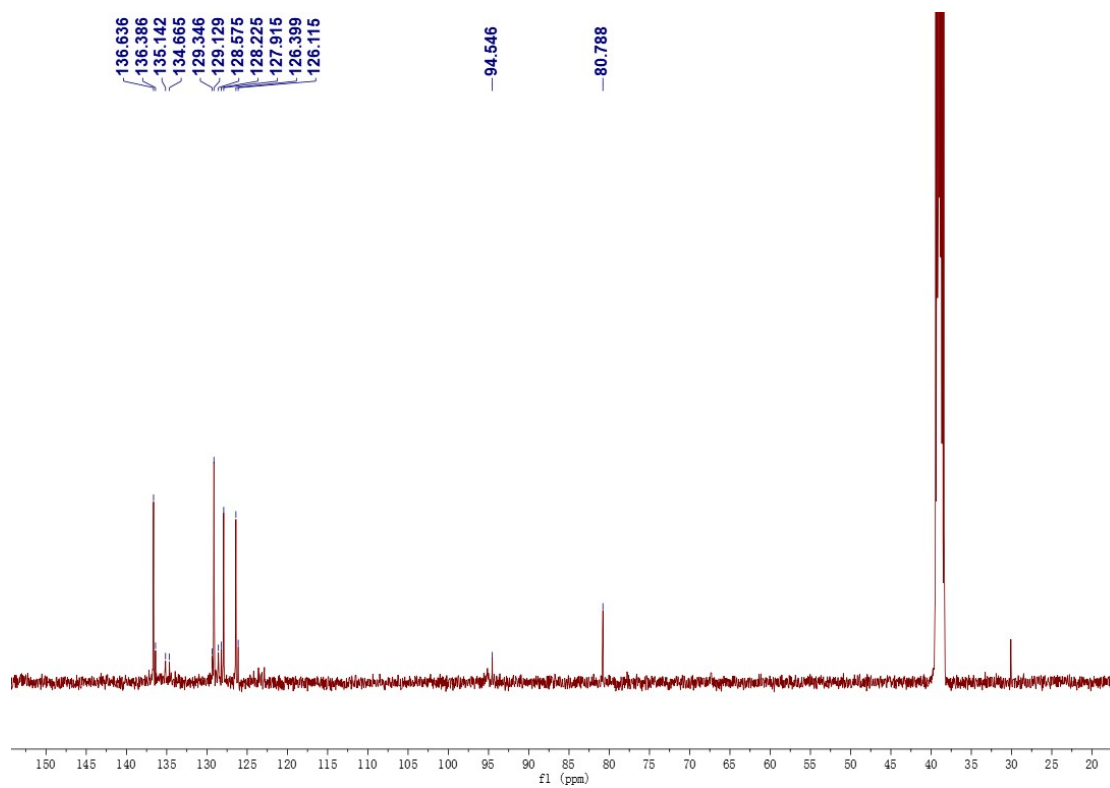

3-(naphthalen-2-yl)-6-phenyl-3,5-dihydrofuro[3,4-c]pyridine-1,4-dione (3j)

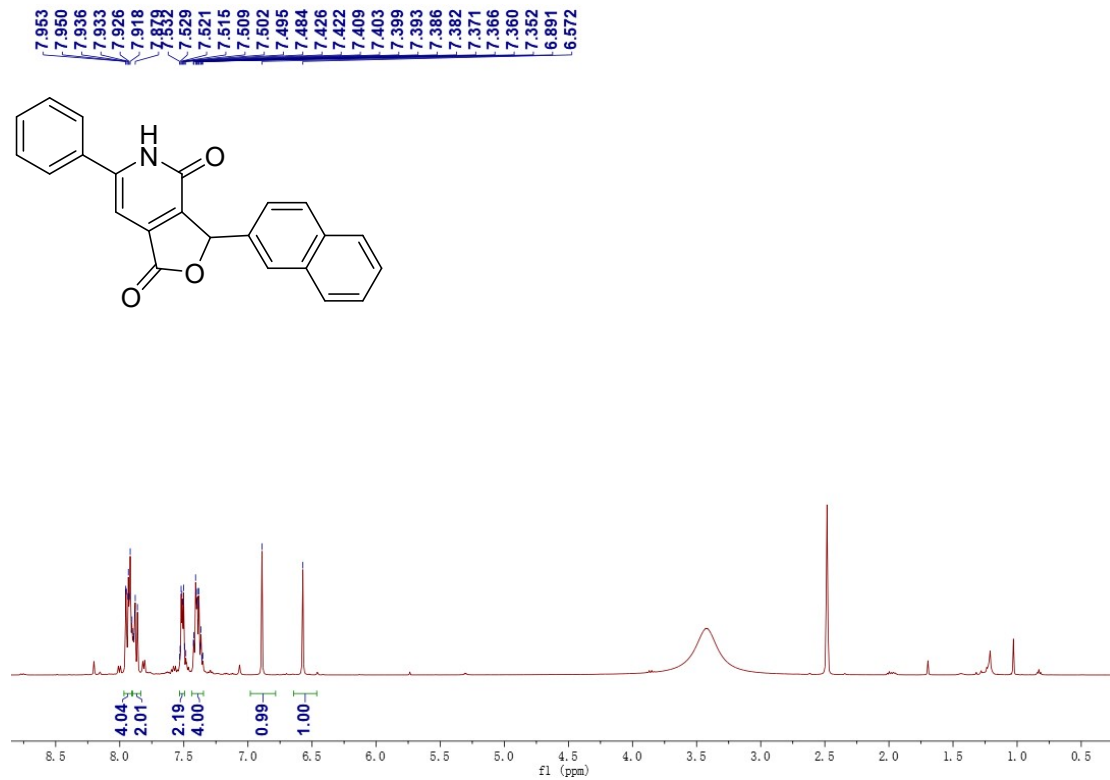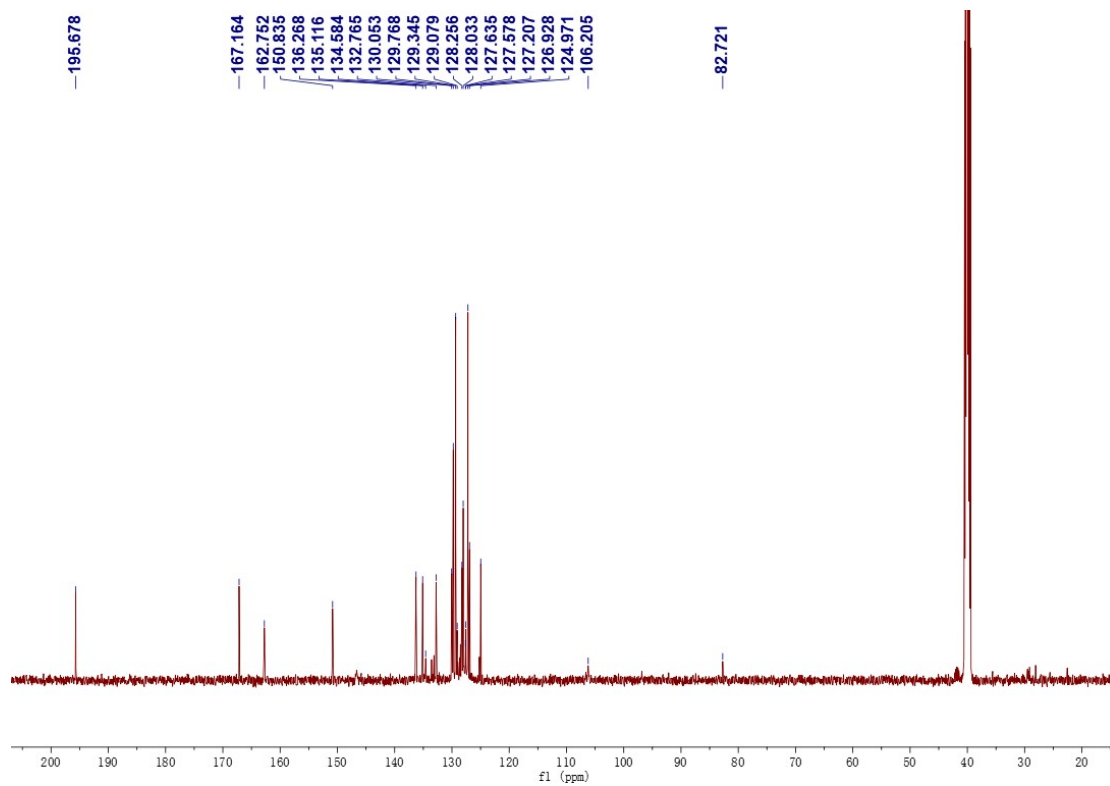

3-cyclopentyl-6-phenyl-3,5-dihydrofuro[3,4-c]pyridine-1,4-dione (3k)

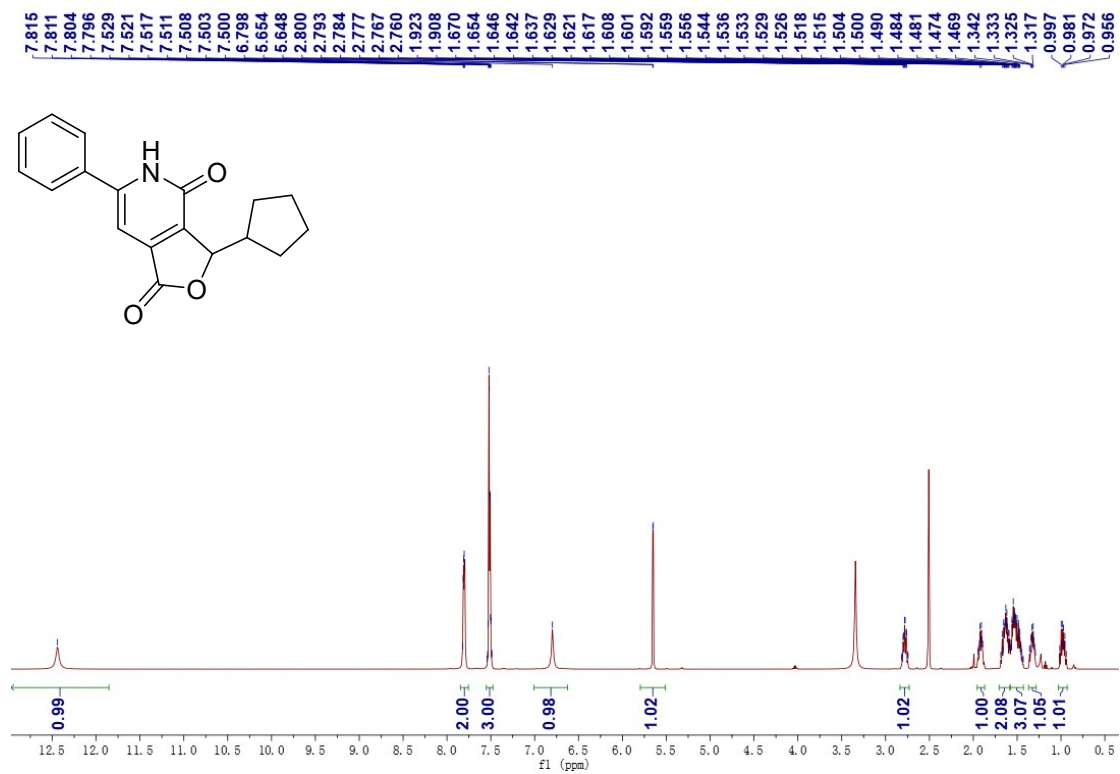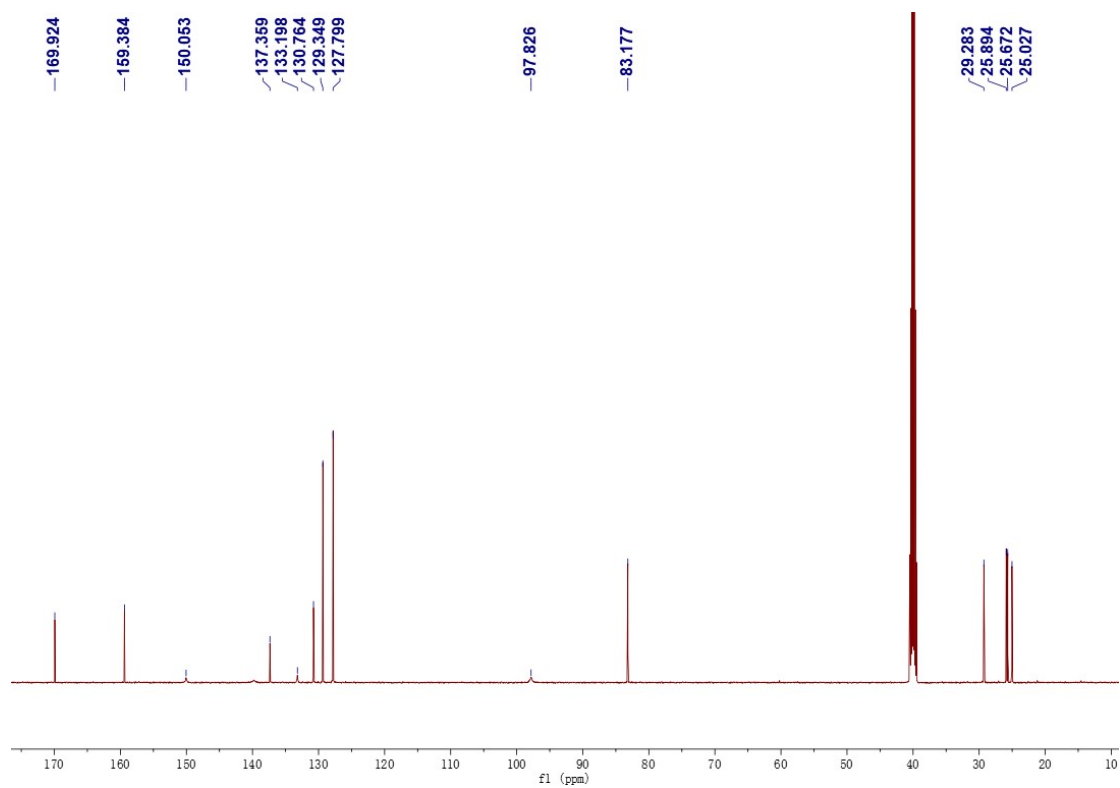

**3-(furan-3-yl)-6-phenyl-3,5-dihydrofuro[3,4-c]pyridine-1,4-dione (3l)**

7.917  
7.915  
7.913  
7.903  
7.899  
7.894  
7.890  
7.885  
7.876  
7.873  
7.870  
7.840  
7.831  
7.675  
7.671  
7.668  
7.651  
7.647  
7.644  
7.641  
7.638  
7.480  
7.476  
7.472  
7.468  
7.461  
7.458  
7.455  
7.451  
7.446  
7.442  
7.435  
7.432  
7.429  
6.832  
6.506  
6.502  
6.456  
6.451  
6.435  
6.429

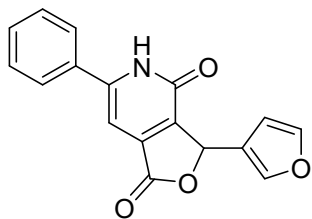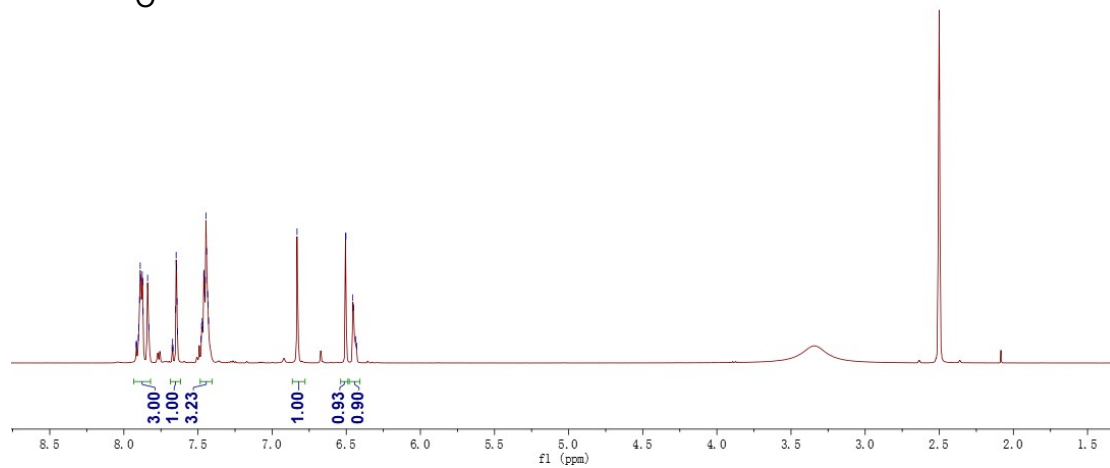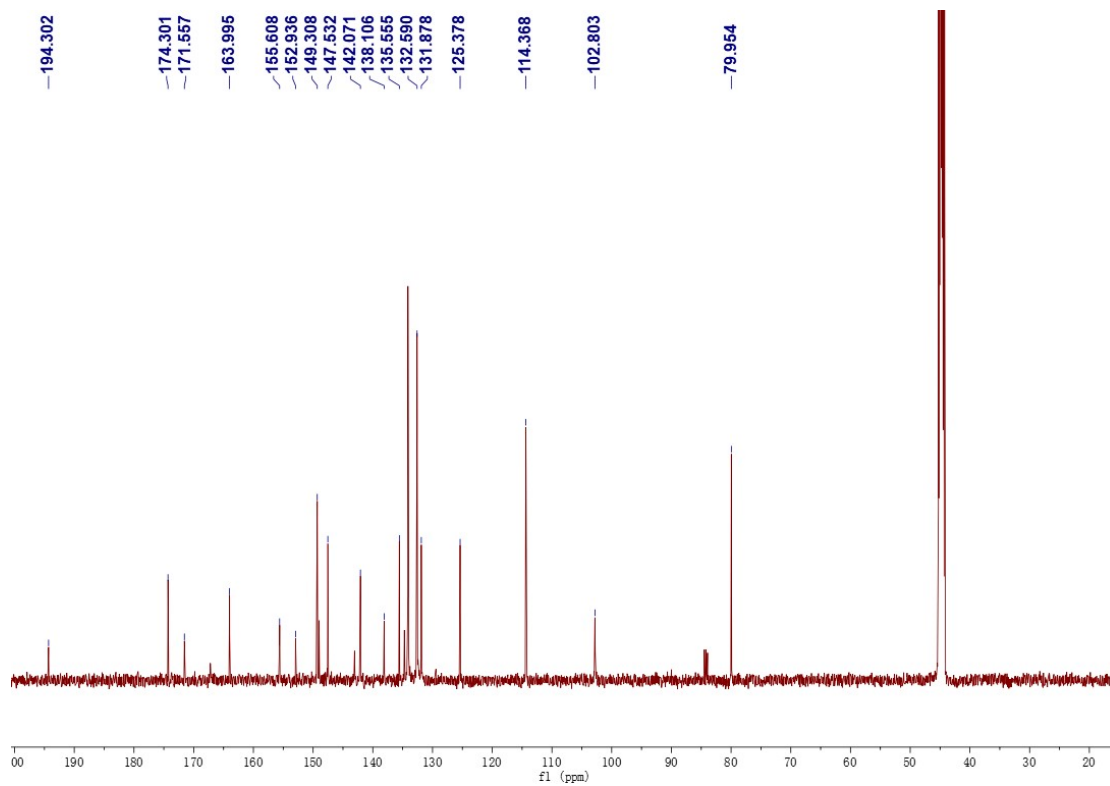

6-phenyl-3-(thiophen-3-yl)-3,5-dihydrofuro[3,4-c]pyridine-1,4-dione (3m)

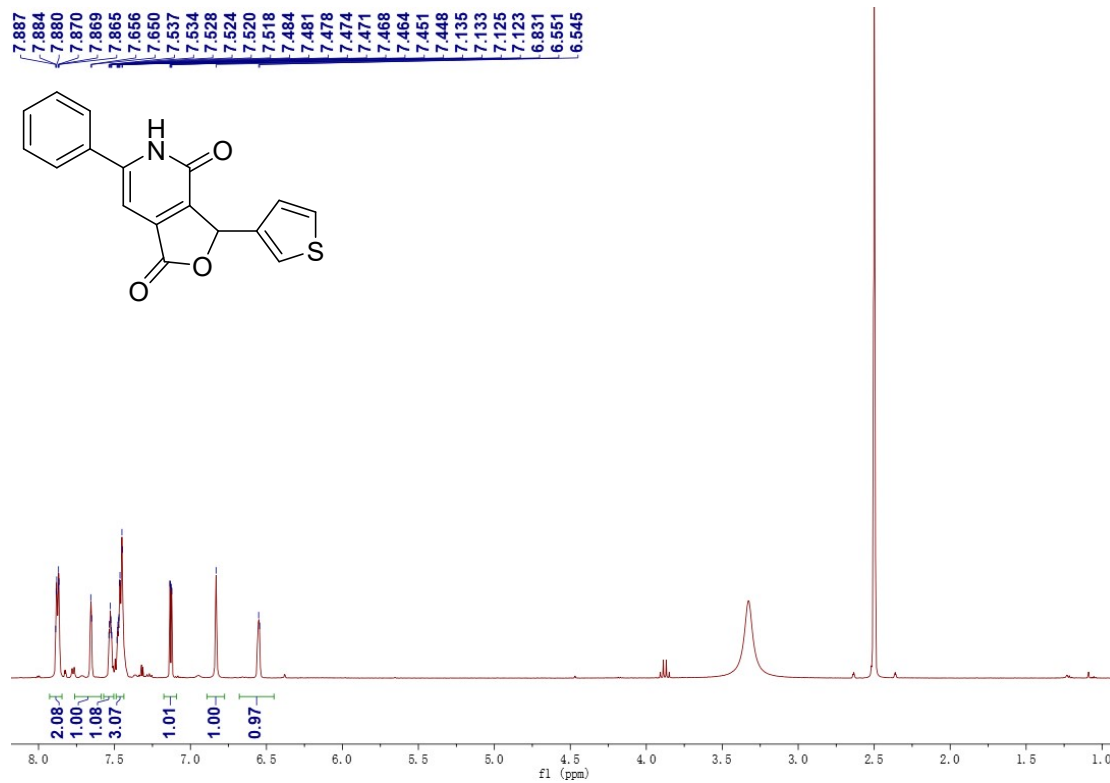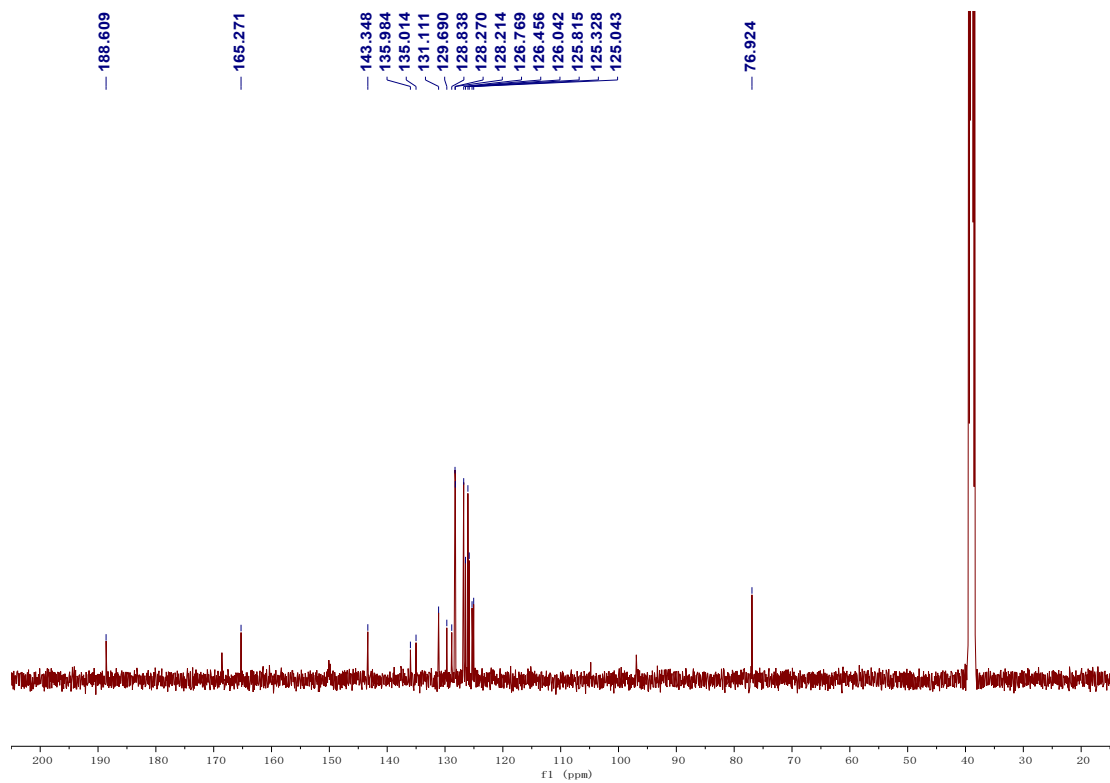

3,3-dimethyl-6-phenyl-3,5-dihydrofuro[3,4-c]pyridine-1,4-dione (3n)

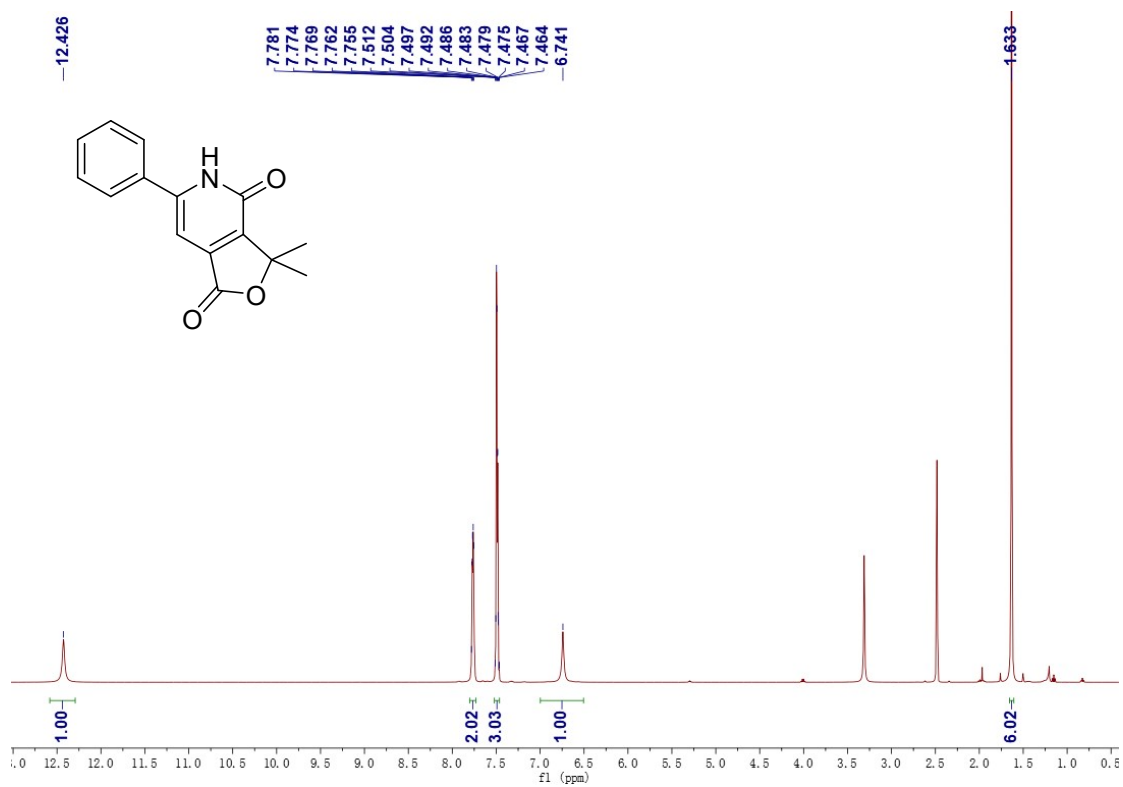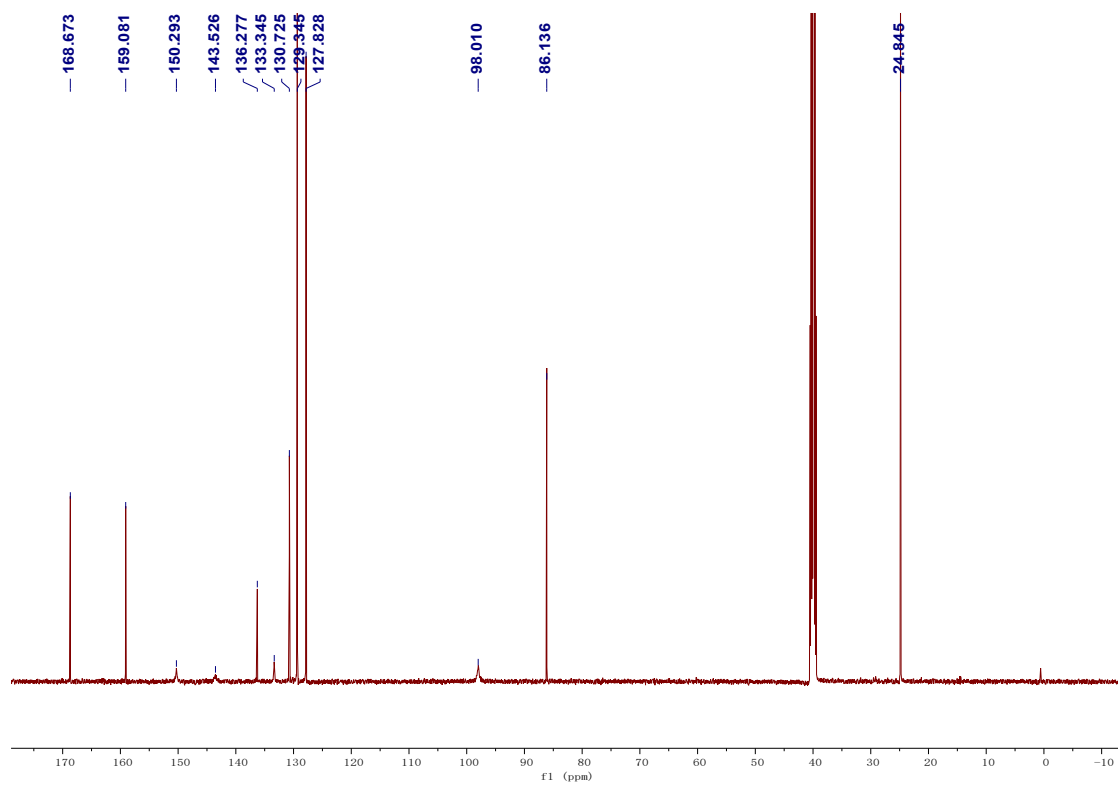

6-(4-methoxyphenyl)-3-phenyl-3,5-dihydrofuro[3,4-c]pyridine-1,4-dione (30)

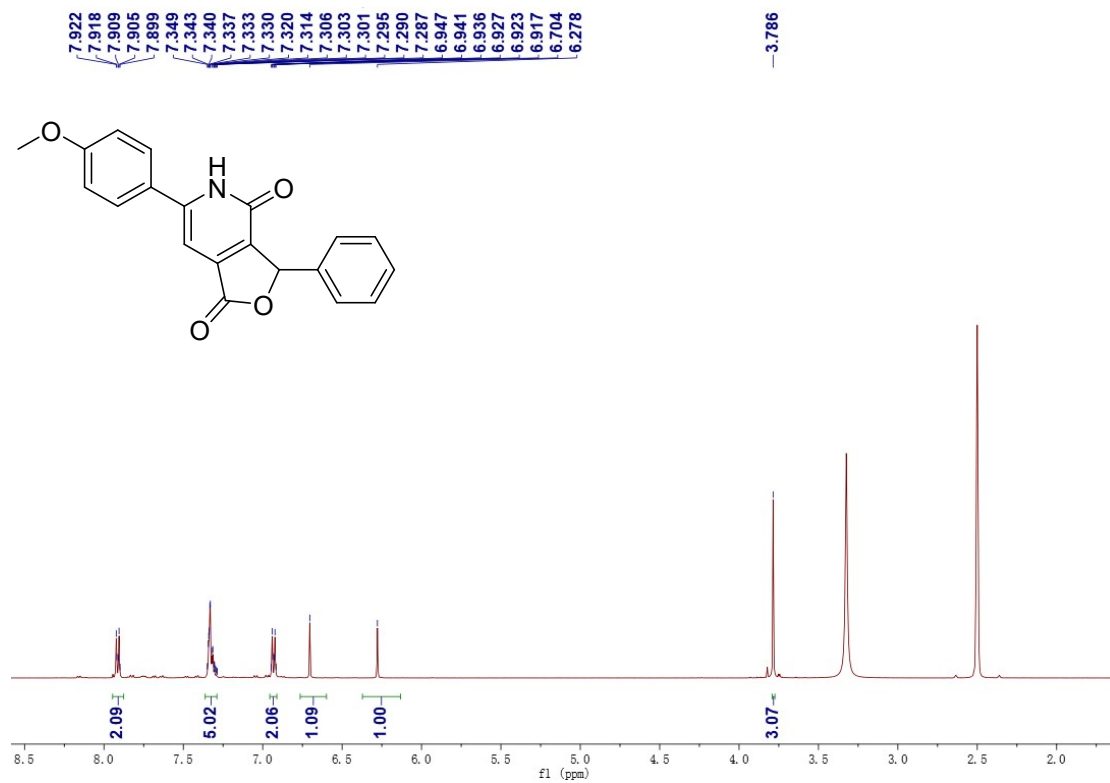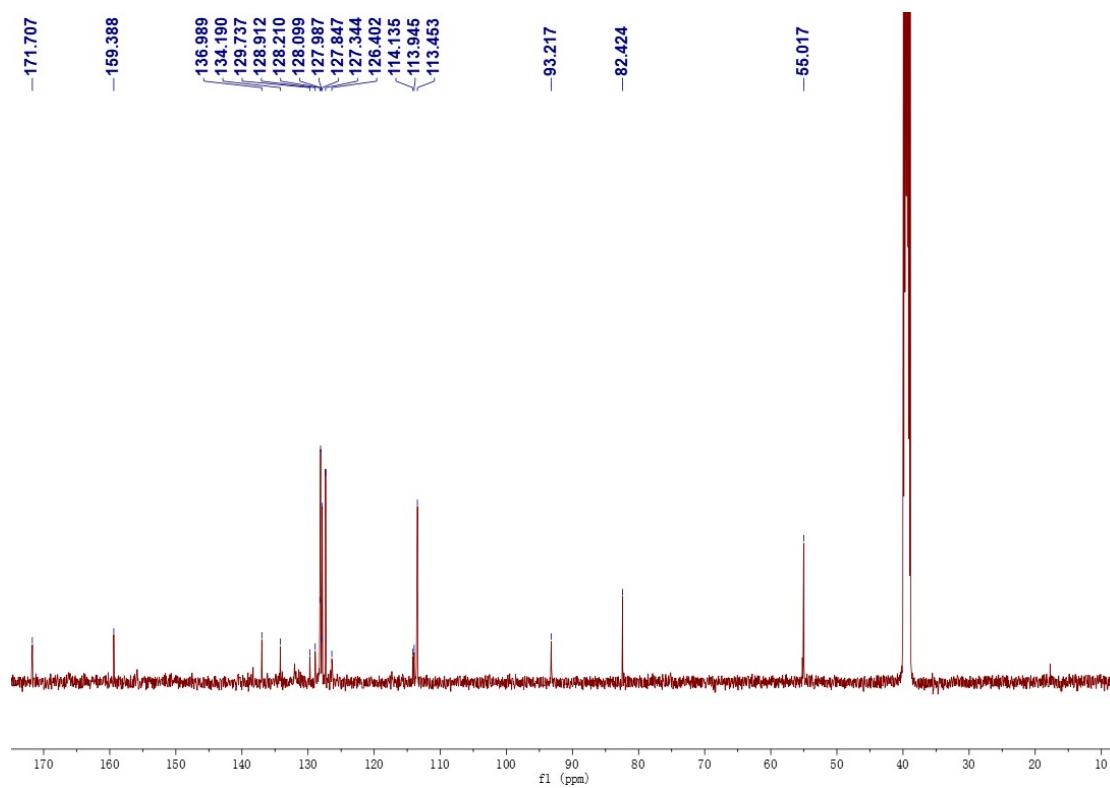

3-phenyl-6-(p-tolyl)-3,5-dihydrofuro[3,4-c]pyridine-1,4-dione (3p)

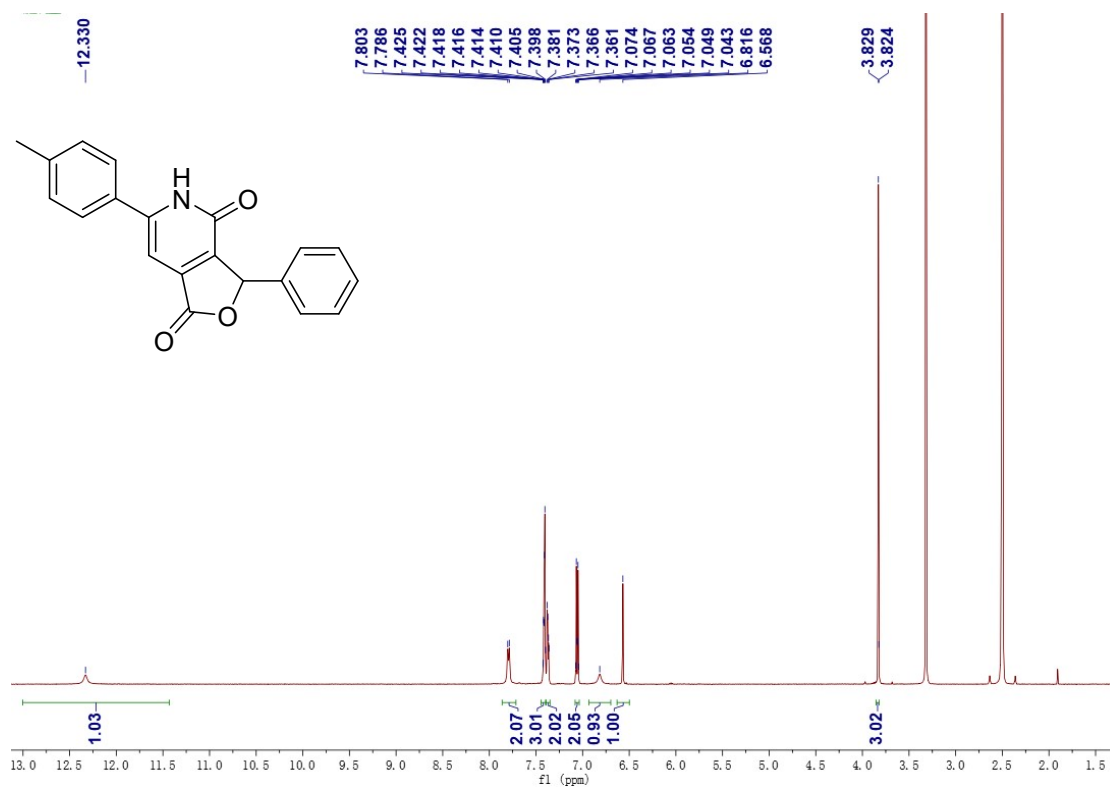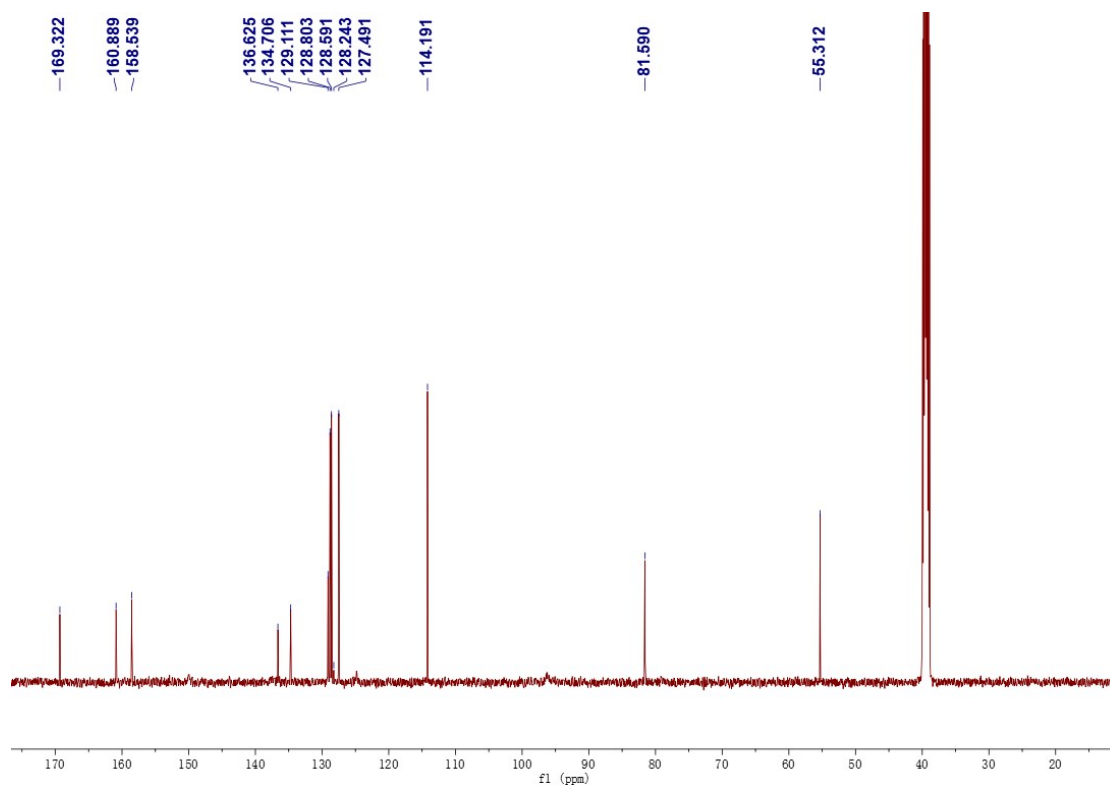



6-benzyl-3-phenyl-3,5-dihydrofuro[3,4-c]pyridine-1,4-dione (3q)

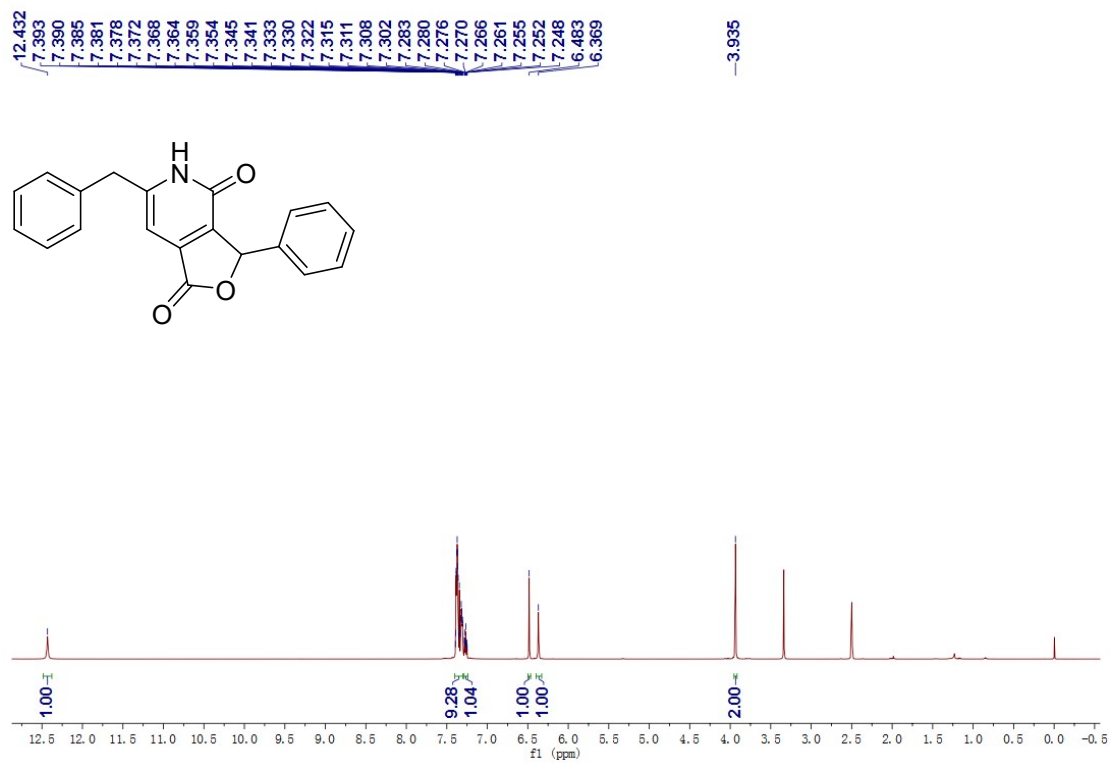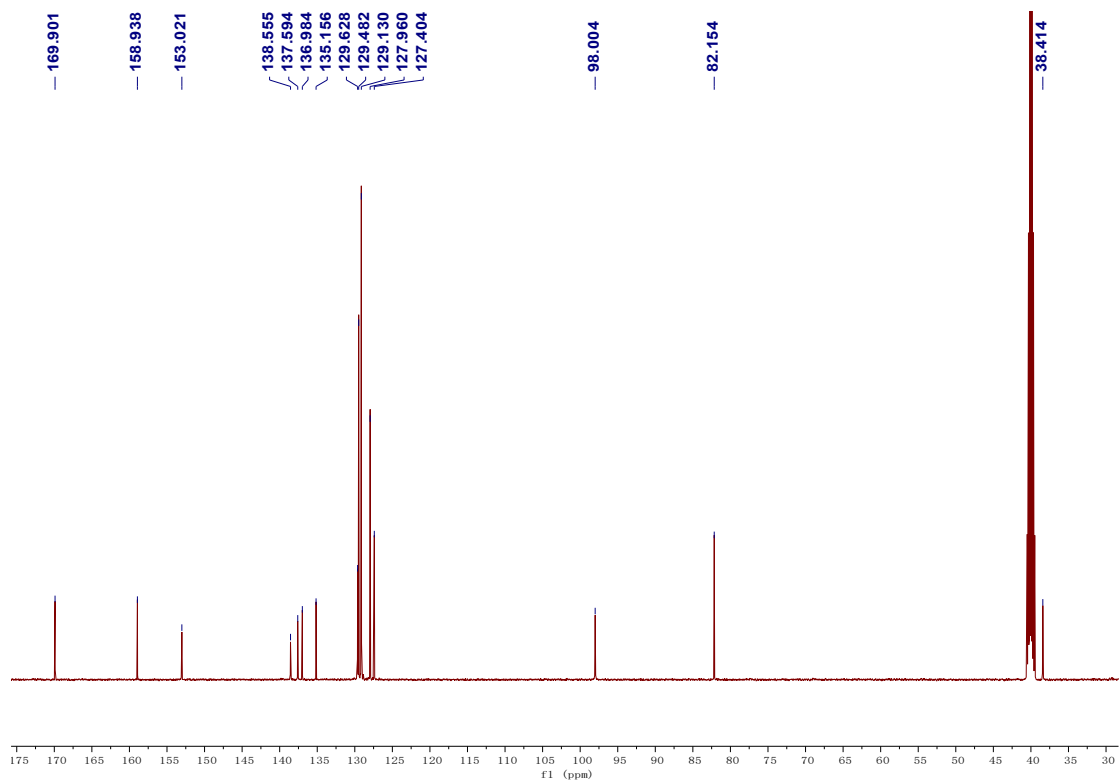

6-methyl-3-phenyl-3,5-dihydrofuro[3,4-c]pyridine-1,4-dione (3r)

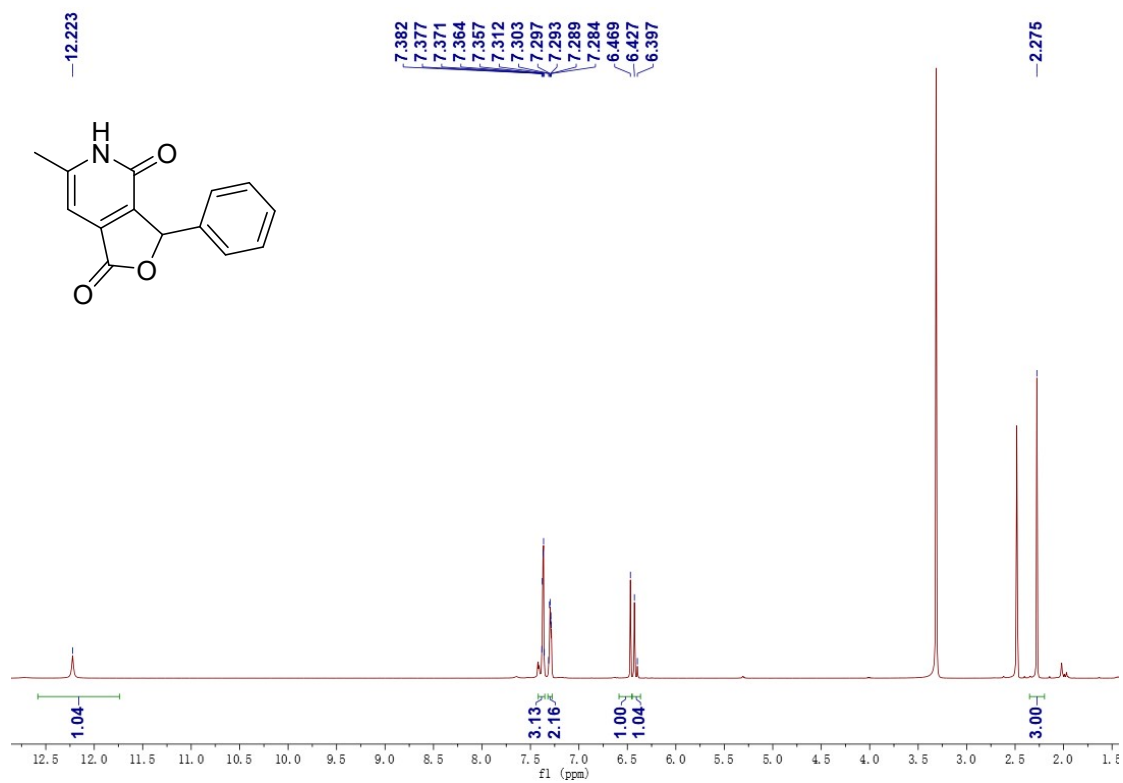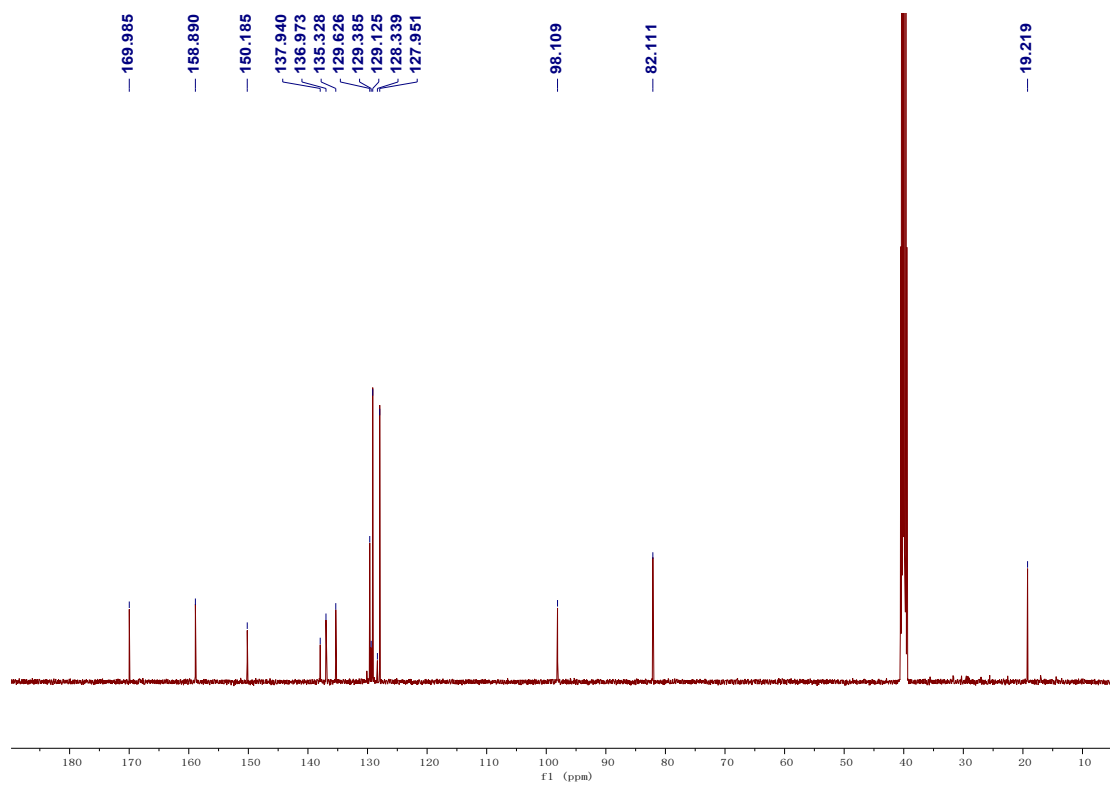

6-(4-chlorophenyl)-3-phenyl-3,5-dihydrofuro[3,4-c]pyridine-1,4-dione (3s)

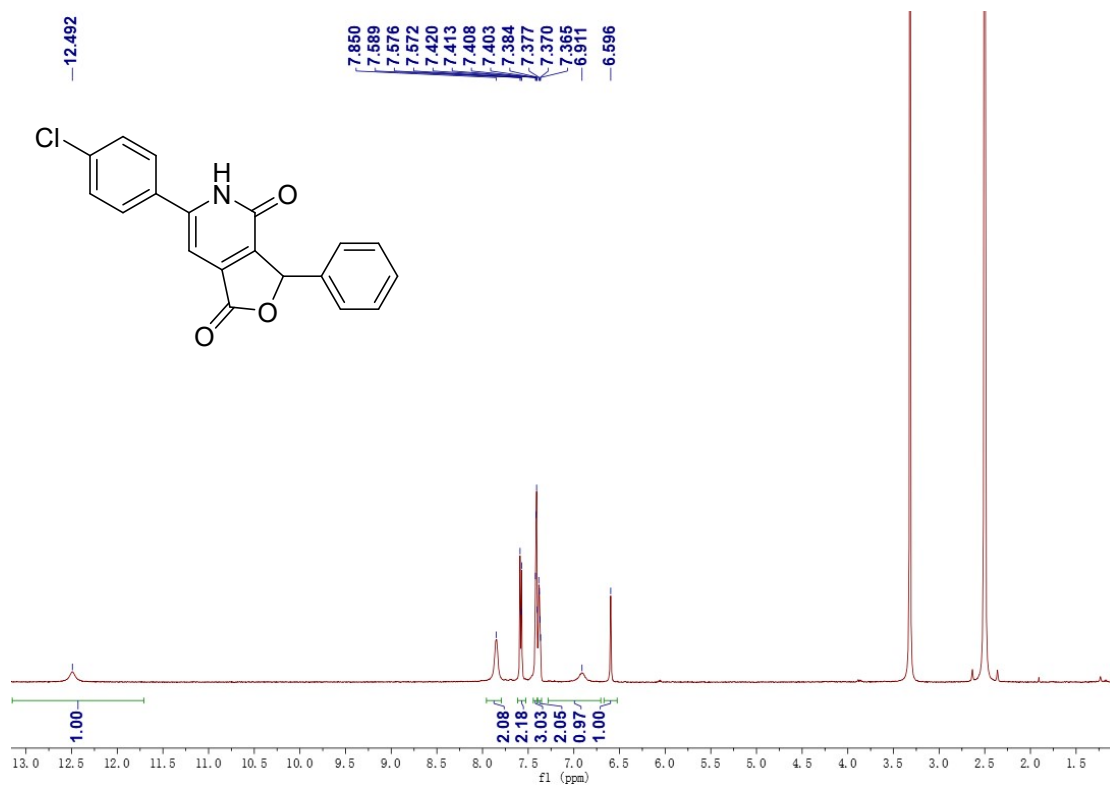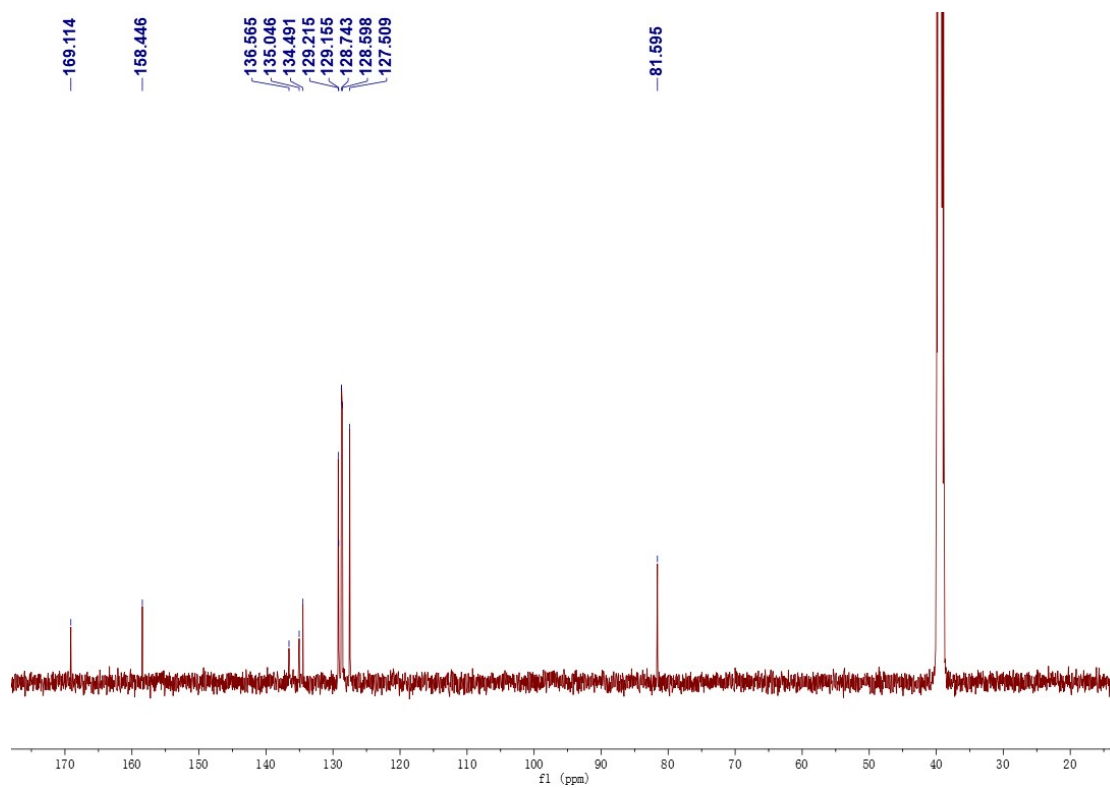

6-(4-bromophenyl)-3-phenyl-3,5-dihydrofuro[3,4-c]pyridine-1,4-dione (3t)

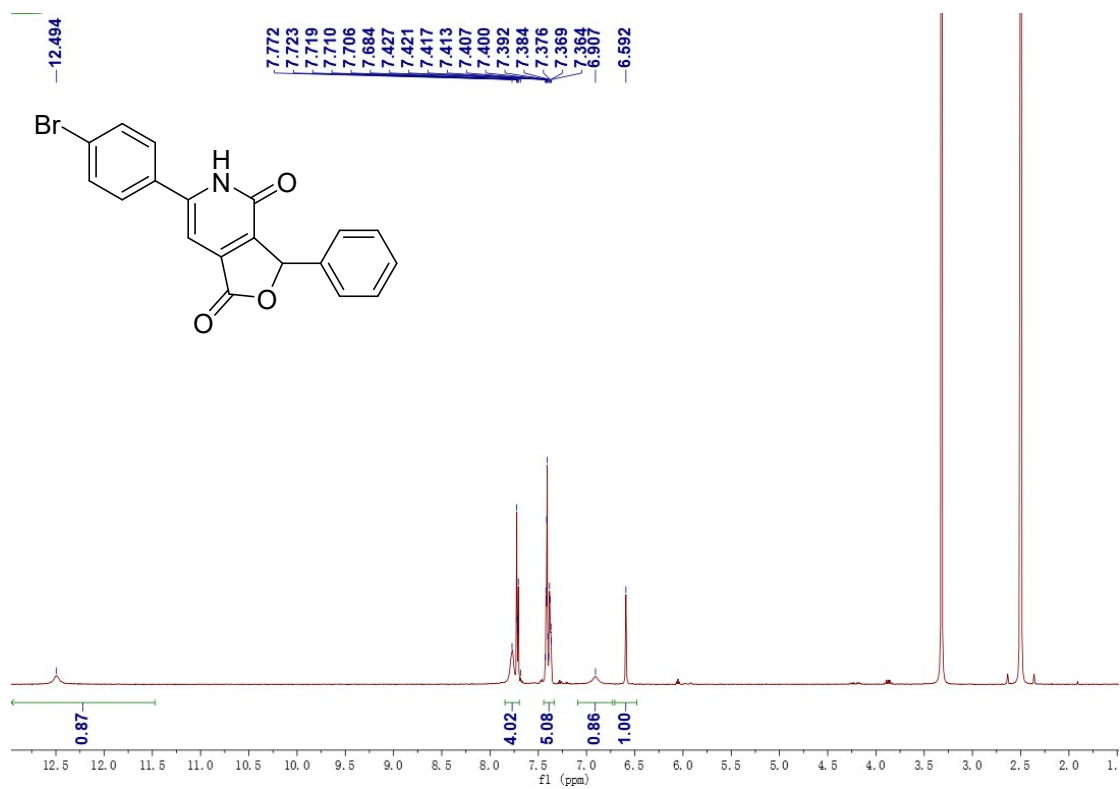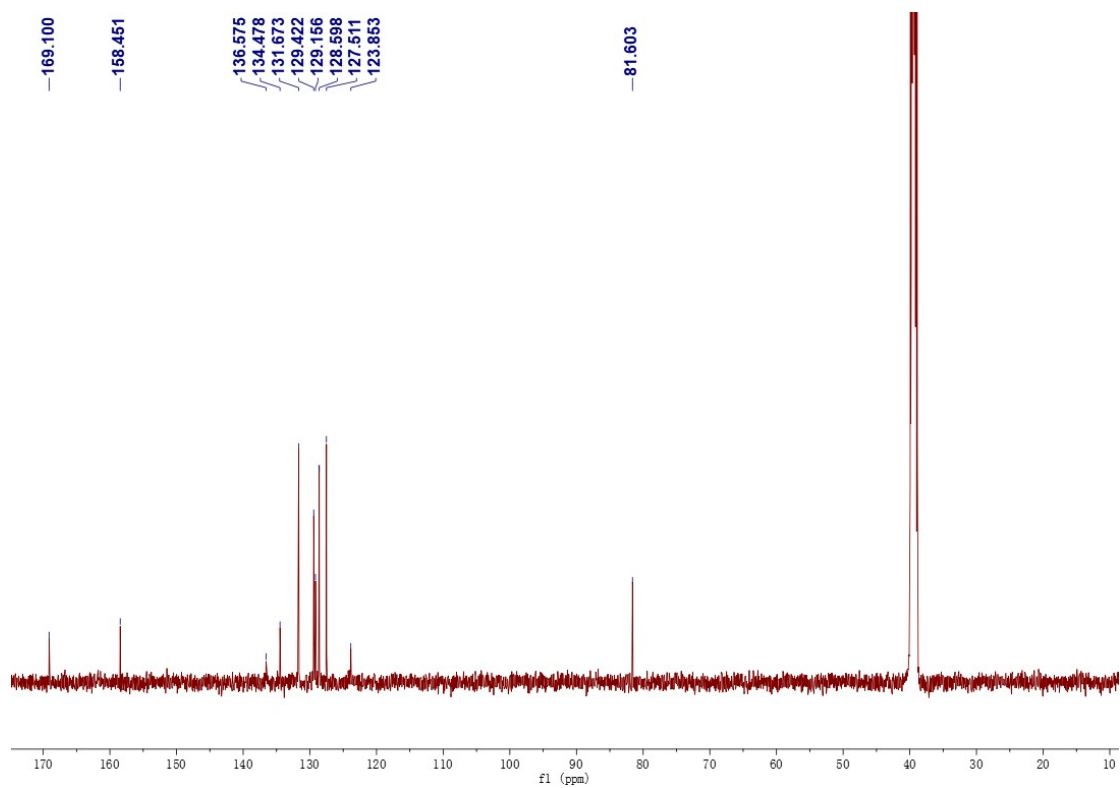

6-(4-iodophenyl)-3-phenyl-3,5-dihydrofuro[3,4-c]pyridine-1,4-dione (3u)

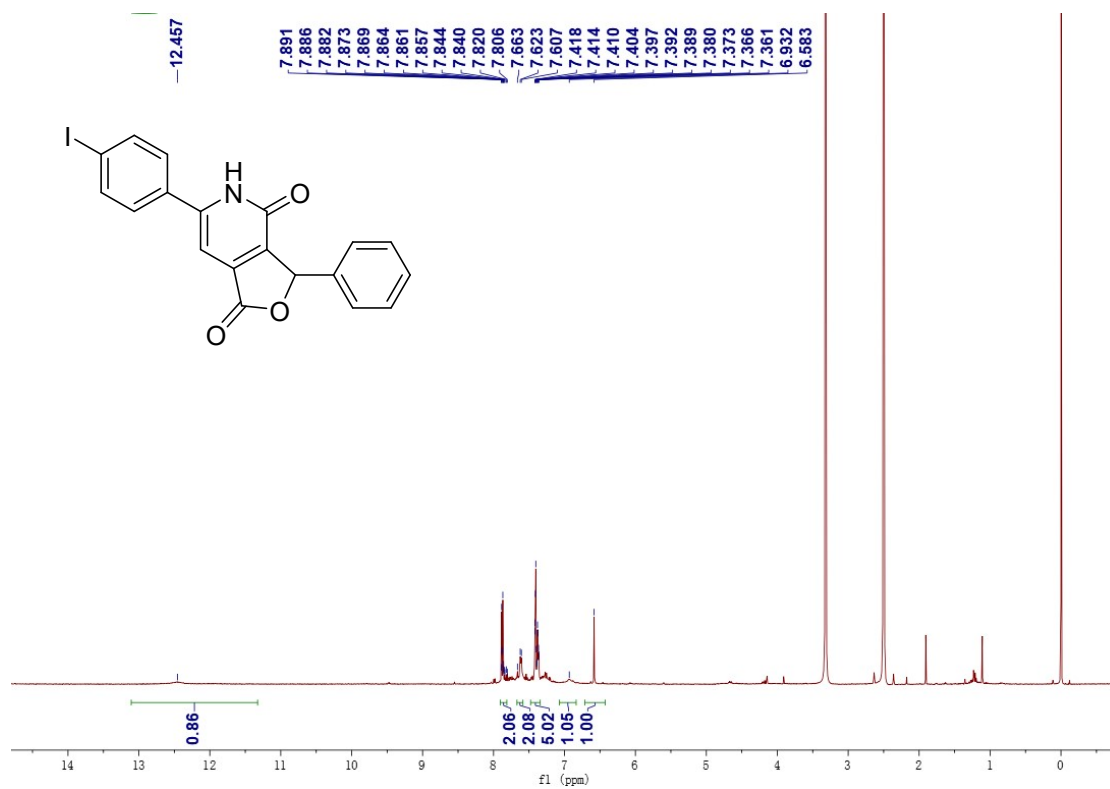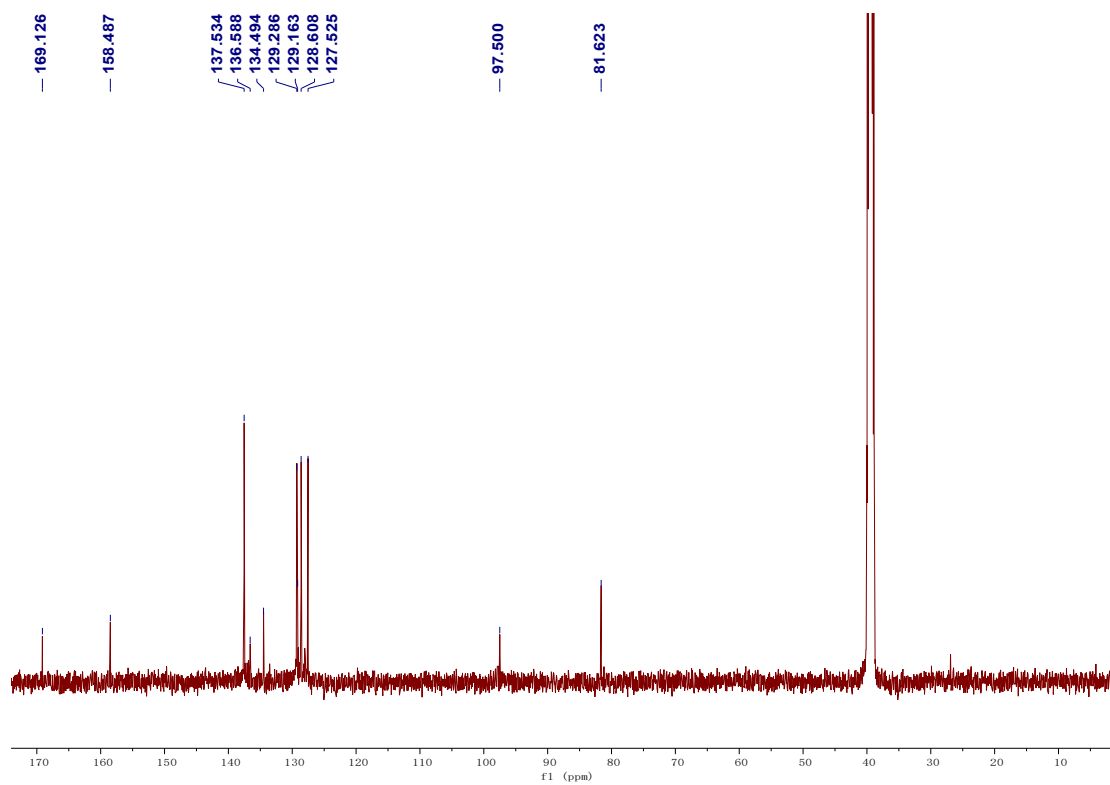

Supplement: d3qo00909b1.pdf [file d3qo00909b1.pdf]
